# Supplementary material for: Synthesis of trifluoromethyl-containing isoindolinones from tertiary enamides via a cascade radical addition and cyclization process
Source: Royal Society of Chemistry journal article supplement (doi:10.1039/c8ra03696a), 2018-01-01

COMMUNICATION

Supporting Information

*For*

Synthesis of trifluoromethyl-containing isoindolinones from tertiary enamides via cascade radical addition and cyclization process

Hui Yu,\* Mingdong Jiao, Xiaowei Fang, Pengfei Xuan

Department of Chemistry, Tongji University, 1239 Siping Road, Shanghai, 200092, China

Email: [yuhui@tongji.edu.cn](mailto:yuhui@tongji.edu.cn)

List of Contents

|                                                                       |        |
|-----------------------------------------------------------------------|--------|
| General Methods                                                       | S2     |
| Analytical data for compounds <b>2a-s</b> , <b>4a-i</b> , <b>6a-b</b> | S2-17  |
| Copies of <sup>1</sup> H and <sup>13</sup> C NMR spectra              | S18-46 |

## (A) General Methods

Commercially available reagents were used as received without further purification unless otherwise indicated. Reactions were magnetically stirred and monitored by thin layer chromatography (TLC) using Silica Gel 60 F254 plates and were visualized by fluorescence quenching at 254 nm. For chromatographic purifications, analytically pure solvents were used and the silica gel 300-400 mesh was used as the solid support.  $^1\text{H}$  NMR and  $^{13}\text{C}$  NMR chemical shifts were reported in  $\delta$  units, parts per million (ppm) relative to the chemical shift of residual solvent. Reference peaks for chloroform in  $^1\text{H}$  NMR and  $^{13}\text{C}$  NMR spectra were set at 7.26 ppm and 77.0 ppm, respectively.

## (B) Analytical data for the products

### Typical experimental procedure for the synthesis of trifluoromethyl-containing isoindolinones **2** and **4**

In a 25 mL sealed tube, a mixture of *N*-butyl-*N*-(prop-1-en-2-yl)benzamide **1a** (43.4mg, 0.2 mmol),  $\text{KHF}_2$  (12.4 mg, 1.0 equiv),  $\text{TMSCF}_3$  (113.8 mg, 4 equiv),  $\text{PhI}(\text{OAc})_2$  (257.7mg, 4 equiv), EtOAc (2mL) was stirred at  $80^\circ\text{C}$  under  $\text{N}_2$  for 12h. The reaction mixture was quenched with saturate brine, dried over anhydrous  $\text{Na}_2\text{SO}_4$ , and evaporated in vacuum. The residue was purified by flash chromatography on silica gel by gradient elution (ethyl acetate in petroleum ether, 4:1) to obtain the corresponding product **2a**.

### 2-butyl-3-methyl-3-(2, 2, 2-trifluoroethyl)isoindolin-1-one

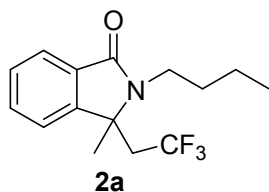

Yellow liquid, 75 % yield;  $^1\text{H}$  NMR (400 MHz,  $\text{CDCl}_3$ )  $\delta$  = 7.84 (d,  $J$  = 7.5 Hz, 1H), 7.56 (t,  $J$  = 7.4 Hz, 1H), 7.47 (t,  $J$  = 7.4 Hz, 1H), 7.42 (d,  $J$  = 7.6 Hz, 1H), 3.67-3.69 (m, 1H), 3.21-3.07 (m, 1H), 2.76 (q,  $J$  = 10.1 Hz, 2H), 1.96-1.79 (m, 1H), 1.59 (d,  $J$  = 10.9 Hz, 4H), 1.43 (dd,  $J$  = 13.4, 8.8 Hz, 2H), 0.98 (t,  $J$  = 7.3 Hz, 3H).

$^{13}\text{C}$  NMR (101 MHz,  $\text{CDCl}_3$ )  $\delta$  = 167.77, 147.62, 131.62, 131.35, 128.70, 124.23(q,  $J_{\text{CF}}$  = 278.4Hz), 123.72, 121.21, 61.87, 40.36 (q,  $J_{\text{CF}}$  = 27.3 Hz), 40.08, 31.18, 26.43, 20.71, 13.82.

$^{19}\text{F}$  NMR (377 MHz,  $\text{CDCl}_3$ )  $\delta = -61.60$  (s).

HRMS (ESI-TOF)  $m/z = 308.1233$   $[\text{M} + \text{Na}]^+$ , calcd for  $\text{C}_{15}\text{H}_{18}\text{F}_3\text{NNaO}$ : 308.1238

### 2-butyl-3, 7-dimethyl-3-(2, 2, 2-trifluoroethyl)isoindolin-1-one

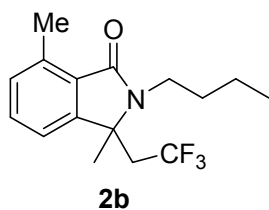

Yellow solid, 72 % yield;  $^1\text{H}$  NMR (600 MHz,  $\text{CDCl}_3$ )  $\delta = 7.40$  (t,  $J = 7.6$  Hz, 1H), 7.20 (t,  $J = 8.0$  Hz, 2H), 3.64-3.66 (m, 1H), 3.10-3.12 (m, 1H), 2.81-2.67 (m, 5H), 1.91-1.80 (m, 1H), 1.63-1.56 (m, 1H), 1.55 (d,  $J = 6.7$  Hz, 3H), 1.45-1.39 (m, 2H), 0.98 (t,  $J = 7.4$  Hz, 3H).

$^{13}\text{C}$  NMR (151 MHz,  $\text{CDCl}_3$ )  $\delta$  167.57, 147.20, 136.70, 129.97, 129.63, 127.26, 123.54 (q,  $J_{\text{CF}} = 278.4$  Hz), 117.54, 59.90, 39.60 (q,  $J_{\text{CF}} = 27.1$  Hz), 38.93, 30.18, 25.71, 19.75, 16.24, 12.79.

$^{19}\text{F}$  NMR (565 MHz,  $\text{CDCl}_3$ )  $\delta = -61.60$  (s).

HRMS (ESI-TOF)  $m/z = 322.1377$   $[\text{M} + \text{Na}]^+$ , calcd for  $\text{C}_{16}\text{H}_{20}\text{F}_3\text{NNaO}$ : 322.1395

### 2-butyl-3, 6-dimethyl-3-(2, 2, 2-trifluoroethyl)isoindolin-1-one

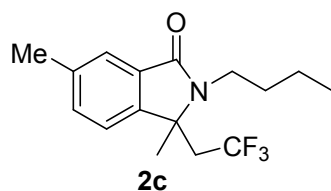

Yellow liquid, 66 % yield;  $^1\text{H}$  NMR (600 MHz,  $\text{CDCl}_3$ )  $\delta = 7.64$  (s, 1H), 7.36 (d,  $J = 7.7$  Hz, 1H), 7.29 (d,  $J = 7.7$  Hz, 1H), 3.72-3.61 (m, 1H), 3.20-3.08 (m, 1H), 2.73 (q,  $J = 10.1$  Hz, 2H), 2.43 (d,  $J = 13.7$  Hz, 3H), 1.90-1.79 (m, 1H), 1.65-1.53 (m, 4H), 1.46-1.38 (m, 2H), 0.97 (t,  $J = 7.2$  Hz, 3H).

$^{13}\text{C}$  NMR (151 MHz,  $\text{CDCl}_3$ )  $\delta$  167.89, 144.87, 138.77, 132.53, 131.43, 124.56 (q,  $J_{\text{CF}} = 278.4$  Hz), 123.92, 120.96, 61.68, 40.56 (q,  $J_{\text{CF}} = 27.2$  Hz), 40.05, 31.17, 26.49, 21.32, 20.70, 13.83.

$^{19}\text{F}$  NMR (565 MHz,  $\text{CDCl}_3$ )  $\delta = -61.59$  (s).

HRMS (ESI-TOF)  $m/z = 322.1389$   $[\text{M} + \text{Na}]^+$ , calcd for  $\text{C}_{16}\text{H}_{20}\text{F}_3\text{NNaO}$ : 322.1395

**2-butyl-3, 5-dimethyl-3-(2, 2, 2-trifluoroethyl)isoindolin-1-one**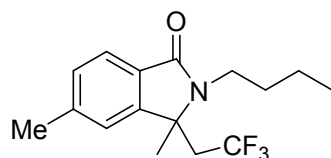**2d**

White solid , 73 % yield ;  $^1\text{H}$  NMR (400 MHz,  $\text{CDCl}_3$ )  $\delta$  = 7.71 (d,  $J$  = 7.7 Hz, 1H), 7.29-7.25 (m, 1H), 7.20 (s, 1H), 3.65-3.67 (m, 1H), 3.18-3.06 (m, 1H), 2.81-2.67 (m, 2H), 2.46 (s, 3H), 1.90-1.80 (m, 1H), 1.57 (d,  $J$  = 13.3 Hz, 4H), 1.46-1.38 (m, 2H), 0.97 (t,  $J$  = 7.3 Hz, 3H).

$^{13}\text{C}$  NMR (151 MHz,  $\text{CDCl}_3$ )  $\delta$  = 167.85, 148.01, 142.23, 129.65, 128.79, 124.53 (q,  $J_{\text{CF}}$  = 278.4 Hz), 123.47, 121.63, 61.64, 40.55 (q,  $J_{\text{CF}}$  = 27.3 Hz), 40.02, 31.22, 26.49, 21.99, 20.70, 13.84.

$^{19}\text{F}$  NMR (377 MHz,  $\text{CDCl}_3$ )  $\delta$  = -61.58 (s).

HRMS (ESI-TOF)  $m/z$  = 322.1389  $[\text{M} + \text{Na}]^+$ , calcd for  $\text{C}_{16}\text{H}_{20}\text{F}_3\text{NNaO}$ : 322.1395

**2-butyl-3, 5, 7-trimethyl-3-(2, 2, 2-trifluoroethyl)isoindolin-1-one**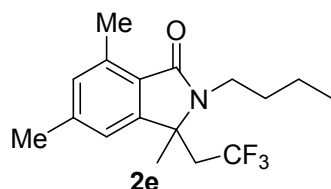**2e**

Yellow liquid , 68 % yield ;  $^1\text{H}$  NMR (600 MHz,  $\text{CDCl}_3$ )  $\delta$  = 7.50 (s, 1H), 7.12 (s, 1H), 3.61 (ddd,  $J$  = 14.3, 11.1, 5.3 Hz, 1H), 3.14-3.16 (m, 1H), 2.92-2.94 (m, 1H), 2.80-2.82 (m, 1H), 2.44 (s, 3H), 2.39 (s, 3H), 1.90-1.83 (m, 1H), 1.65-1.56 (m, 4H), 1.45-1.39 (m, 2H), 0.98 (t,  $J$  = 7.4 Hz, 3H).

$^{13}\text{C}$  NMR (151 MHz,  $\text{CDCl}_3$ )  $\delta$  = 167.92, 141.48, 138.77, 135.09, 132.19, 131.61, 124.46 (q,  $J_{\text{CF}}$  = 278.5 Hz), 121.75, 62.33, 39.68, 38.03 (q,  $J_{\text{CF}}$  = 27.1 Hz), 31.06, 24.48, 21.05, 20.75, 18.67, 13.82.

$^{19}\text{F}$  NMR (565 MHz,  $\text{CDCl}_3$ )  $\delta$  = -62.69 (s).

HRMS (ESI-TOF)  $m/z$  = 336.1546  $[\text{M} + \text{Na}]^+$ , calcd for  $\text{C}_{17}\text{H}_{22}\text{F}_3\text{NNaO}$ : 336.1551

**2-butyl-5-fluoro-3-methyl-3-(2, 2, 2-trifluoroethyl)isoindolin-1-one**

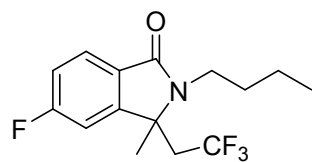**2f**

Yellow solid, 67 % yield;  $^1\text{H}$  NMR (600 MHz,  $\text{CDCl}_3$ )  $\delta$  = 7.82 (dd,  $J$  = 8.3, 5.0 Hz, 1H), 7.17 (td,  $J$  = 8.8, 2.0 Hz, 1H), 7.10 (dd,  $J$  = 8.1, 1.8 Hz, 1H), 3.65-3.67 (m, 1H), 3.16-3.09 (m, 1H), 2.82-2.67 (m, 2H), 1.89-1.80 (m, 1H), 1.64-1.55 (m, 4H), 1.46-1.38 (m, 2H), 0.98 (t,  $J$  = 7.4 Hz, 3H).

$^{13}\text{C}$  NMR (151 MHz,  $\text{CDCl}_3$ )  $\delta$  = 166.68, 165.95, 164.28, 150.04, 125.76, 124.36 (q,  $J_{\text{CF}}$  = 278.3 Hz), 116.53, 108.88, 61.55, 40.47 (q,  $J_{\text{CF}}$  = 27.5 Hz), 40.18, 31.17, 26.39, 20.67, 13.81.

$^{19}\text{F}$  NMR (565 MHz,  $\text{CDCl}_3$ )  $\delta$  = -61.65 (s), -106.97 (s).

HRMS (ESI-TOF)  $m/z$  = 326.1119  $[\text{M} + \text{Na}]^+$ , calcd for  $\text{C}_{15}\text{H}_{17}\text{F}_4\text{NNaO}$ : 326.1144

### 2-butyl-5-chloro-3-methyl-3-(2,2,2-trifluoroethyl)isoindolin-1-one

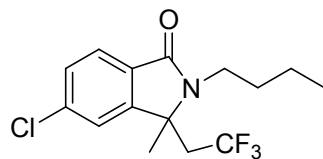**2g**

White solid, 60 % yield;  $^1\text{H}$  NMR (400 MHz,  $\text{CDCl}_3$ )  $\delta$  = 7.77 (d,  $J$  = 8.1 Hz, 1H), 7.48-7.37 (m, 2H), 3.66-3.68 (m, 1H), 3.10-3.12 (n, 1H), 2.87-2.65 (m, 2H), 1.91-1.78 (m, 1H), 1.59 (d,  $J$  = 11.5 Hz, 4H), 1.48-1.35 (m, 2H), 0.97 (t,  $J$  = 7.3 Hz, 3H).

$^{13}\text{C}$  NMR (151 MHz,  $\text{CDCl}_3$ )  $\delta$  = 166.71, 149.21, 137.97, 129.82, 129.36, 125.03,  $\delta$  124.33 (q,  $J_{\text{CF}}$  = 278.2 Hz), 121.76, 61.65, 40.43 (q,  $J_{\text{CF}}$  = 27.4 Hz), 40.20, 31.09, 26.37, 20.68, 13.81.

$^{19}\text{F}$  NMR (377 MHz,  $\text{CDCl}_3$ )  $\delta$  = -61.61 (s).

HRMS (ESI-TOF)  $m/z$  = 342.0877  $[\text{M} + \text{Na}]^+$ , calcd for  $\text{C}_{15}\text{H}_{17}\text{ClF}_3\text{NNaO}$ : 342.0848

### 5-bromo-2-butyl-3-methyl-3-(2,2,2-trifluoroethyl)isoindolin-1-one

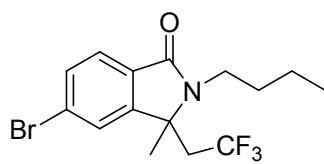**2h**

Yellow solid, 71 % yield;  $^1\text{H}$  NMR (600 MHz,  $\text{CDCl}_3$ )  $\delta$  = 7.70 (t,  $J$  = 6.7 Hz, 1H), 7.63-7.59 (m, 1H), 7.57 (s, 1H), 3.66-3.68 (m, 1H), 3.15-3.08 (m, 1H), 2.83-2.68 (m, 2H), 1.89-1.80 (m, 1H), 1.62-1.54 (m, 4H), 1.45-1.38 (m, 2H), 0.97 (t,  $J$  = 7.4 Hz, 3H).

$^{13}\text{C}$  NMR (151 MHz,  $\text{CDCl}_3$ )  $\delta$  = 166.77, 149.41, 132.20, 130.30, 126.24, 125.21, 124.70, 124.32 (q,  $J_{\text{CF}}$  = 278.4 Hz), 61.63, 40.41 (q,  $J_{\text{CF}}$  = 27.5 Hz), 40.18, 31.07, 26.37, 20.67, 13.81.

$^{19}\text{F}$  NMR (565 MHz,  $\text{CDCl}_3$ )  $\delta$  = -61.62 (s).

HRMS (ESI-TOF)  $m/z$  = 386.0336  $[\text{M} + \text{Na}]^+$ , calcd for  $\text{C}_{15}\text{H}_{17}\text{BrF}_3\text{NNaO}$ : 386.0343

### 2-butyl-7-chloro-3-methyl-3-(2,2,2-trifluoroethyl)isoindolin-1-one

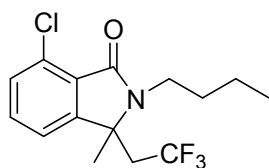**2i**

White solid, 70 % yield;  $^1\text{H}$  NMR (600 MHz,  $\text{CDCl}_3$ )  $\delta$  = 7.47 (t,  $J$  = 7.7 Hz, 1H), 7.40 (d,  $J$  = 7.9 Hz, 1H), 7.32 (d,  $J$  = 7.5 Hz, 1H), 3.73-3.61 (m, 1H), 3.21-3.05 (m, 1H), 2.88-2.68 (m, 2H), 1.92-1.81 (m, 1H), 1.64-1.54 (m, 4H), 1.46-1.38 (m, 2H), 0.97 (t,  $J$  = 7.4 Hz, 3H).

$^{13}\text{C}$  NMR (151 MHz,  $\text{CDCl}_3$ )  $\delta$  = 165.36, 150.12, 132.30, 131.48, 130.38, 127.33, 124.36 (q,  $J_{\text{CF}}$  = 278.4 Hz), 119.79, 60.79, 40.47 (q,  $J_{\text{CF}}$  = 27.4 Hz), 40.21, 30.95, 26.64, 20.70, 13.77.

$^{19}\text{F}$  NMR (565 MHz,  $\text{CDCl}_3$ )  $\delta$  = -61.58 (s).

HRMS (ESI-TOF)  $m/z$  = 342.0829  $[\text{M} + \text{Na}]^+$ , calcd for  $\text{C}_{15}\text{H}_{17}\text{ClF}_3\text{NNaO}$ : 342.0848

### 2-butyl-5,7-dichloro-3-methyl-3-(2,2,2-trifluoroethyl)isoindolin-1-one

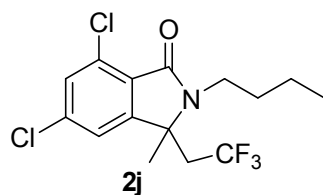

Yellow solid, 36 % yield;  $^1\text{H NMR}$  (600 MHz,  $\text{CDCl}_3$ )  $\delta$  = 7.43 (d,  $J$  = 1.5 Hz, 1H), 7.30 (d,  $J$  = 1.5 Hz, 1H), 3.64-3.66 (m, 1H), 3.08-3.10 (m, 1H), 2.81-2.68 (m, 2H), 1.90-1.82 (m, 1H), 1.58 (s, 1H), 1.56 (s, 3H), 1.40-1.42 (m, 2H), 0.97 (t,  $J$  = 7.4 Hz, 3H).

$^{13}\text{C NMR}$  (151 MHz,  $\text{CDCl}_3$ )  $\delta$  164.44, 151.20, 138.05, 132.43, 130.54, 126.04, 124.28 (q,  $J_{\text{CF}}$  = 278.7 Hz), 120.42, 60.73, 40.45 (q,  $J_{\text{CF}}$  = 27.6 Hz), 40.32, 30.92, 26.57, 20.69, 13.77.

$^{19}\text{F NMR}$  (565 MHz,  $\text{CDCl}_3$ )  $\delta$  = -61.55 (s).

HRMS (ESI-TOF)  $m/z$  = 376.0453 [ $\text{M} + \text{Na}$ ] $^+$ , calcd for  $\text{C}_{15}\text{H}_{16}\text{Cl}_2\text{F}_3\text{NNaO}$ : 376.0459

### 2-butyl-3-methyl-5-nitro-3-(2,2,2-trifluoroethyl)isoindolin-1-one

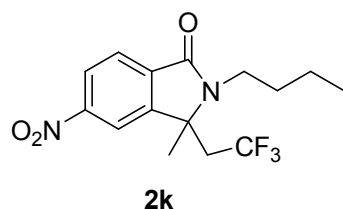

White solid, 67 % yield;  $^1\text{H NMR}$  (600 MHz,  $\text{CDCl}_3$ )  $\delta$  = 8.38 (dd,  $J$  = 8.3, 1.7 Hz, 1H), 8.31 (d,  $J$  = 1.0 Hz, 1H), 8.00 (d,  $J$  = 8.3 Hz, 1H), 3.71-3.73 (m, 1H), 3.22-3.13 (m, 1H), 2.92-2.82 (m, 2H), 1.94-1.81 (m, 1H), 1.65 (d,  $J$  = 13.3 Hz, 3H), 1.63-1.57 (m, 1H), 1.49-1.39 (m, 2H), 0.99 (t,  $J$  = 7.4 Hz, 3H).

$^{13}\text{C NMR}$  (151 MHz,  $\text{CDCl}_3$ )  $\delta$  = 165.38, 150.20, 148.59, 136.68, 124.91, 124.57, 124.17 (q,  $J_{\text{CF}}$  = 278.5 Hz), 117.03, 62.10, 40.55, 40.27 (d,  $J_{\text{CF}}$  = 27.6 Hz), 30.90, 26.34, 20.66, 13.76.

$^{19}\text{F NMR}$  (565 MHz,  $\text{CDCl}_3$ )  $\delta$  = -61.65 (s).

### 2-butyl-3-methyl-3-(2,2,2-trifluoroethyl)-2,3-dihydro-1H-benzo[e]isoindol-1-one

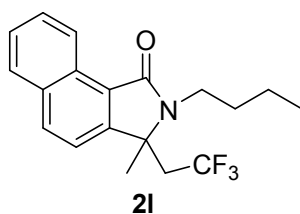

Yellow liquid, 60 % yield;  $^1\text{H}$  NMR (600 MHz,  $\text{CDCl}_3$ )  $\delta$  = 9.25 (d,  $J$  = 8.4 Hz, 1H), 8.03 (d,  $J$  = 8.4 Hz, 1H), 7.92 (d,  $J$  = 8.2 Hz, 1H), 7.67 (t,  $J$  = 8.0 Hz, 1H), 7.58 (t,  $J$  = 7.9 Hz, 1H), 7.48 (d,  $J$  = 8.4 Hz, 1H), 3.74-3.76 (m, 1H), 3.20-3.22 (m, 1H), 2.84 (q,  $J$  = 10.1 Hz, 2H), 1.94-1.90 (m, 1H), 1.69-1.64 (m, 1H), 1.62 (d,  $J$  = 9.8 Hz, 3H), 1.49-1.42 (m, 2H), 1.00 (t,  $J$  = 7.4 Hz, 3H).

$^{13}\text{C}$  NMR (151 MHz,  $\text{CDCl}_3$ )  $\delta$  = 168.73, 147.72, 133.31, 132.54, 129.27, 128.14, 128.11, 126.81, 125.80 (q,  $J_{\text{CF}}$  = 278.4 Hz), 125.25, 124.22, 118.20, 61.22, 40.17 (q,  $J_{\text{CF}}$  = 27.2 Hz), 40.08, 31.25, 26.28, 20.80, 13.87.

$^{19}\text{F}$  NMR (565 MHz,  $\text{CDCl}_3$ )  $\delta$  = -61.69 (s).

HRMS (ESI-TOF)  $m/z$  = 358.1392  $[\text{M} + \text{Na}]^+$ , calcd for  $\text{C}_{19}\text{H}_{20}\text{F}_3\text{NNaO}$ : 358.1395

### 3-methyl-2-propyl-3-(2, 2, 2-trifluoroethyl)isoindolin-1-one

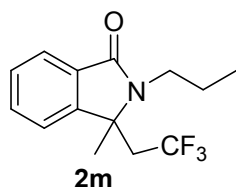

White solid, 64 % yield;  $^1\text{H}$  NMR (600 MHz,  $\text{CDCl}_3$ )  $\delta$  = 7.84 (d,  $J$  = 7.5 Hz, 1H), 7.56 (td,  $J$  = 7.5, 1.1 Hz, 1H), 7.47 (td,  $J$  = 7.5, 0.9 Hz, 1H), 7.42 (d,  $J$  = 7.6 Hz, 1H), 3.64-3.66 (m, 1H), 3.09-3.11 (m, 1H), 2.82-2.70 (m, 2H), 1.94-1.85 (m, 1H), 1.71-1.63 (m, 1H), 1.58 (s, 3H), 1.00 (t,  $J$  = 7.4 Hz, 3H).

$^{13}\text{C}$  NMR (151 MHz,  $\text{CDCl}_3$ )  $\delta$  = 167.76, 147.57, 131.61, 131.31, 128.68, 124.50 (q,  $J_{\text{CF}}$  = 278.4 Hz), 123.70, 121.20, 41.91, 40.52 (q,  $J_{\text{CF}}$  = 27.3 Hz), 26.45, 22.31, 11.81.

$^{19}\text{F}$  NMR (565 MHz,  $\text{CDCl}_3$ )  $\delta$  = -61.64 (s).

HRMS (ESI-TOF)  $m/z$  = 294.1067  $[\text{M} + \text{Na}]^+$ , calcd for  $\text{C}_{14}\text{H}_{16}\text{F}_3\text{NNaO}$ : 294.1082

### 2-hexyl-3-methyl-3-(2, 2, 2-trifluoroethyl)isoindolin-1-one

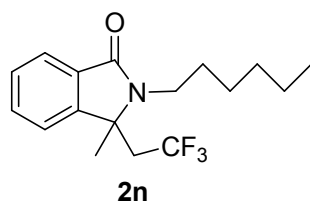



Yellow liquid, 55 % yield;  $^1\text{H}$  NMR (600 MHz,  $\text{CDCl}_3$ )  $\delta$  = 7.84 (d,  $J$  = 7.5 Hz, 1H), 7.56 (t,  $J$  = 7.5 Hz, 1H), 7.47 (t,  $J$  = 7.8 Hz, 1H), 7.42 (d,  $J$  = 7.6 Hz, 1H), 3.66-3.68 (m, 1H), 3.12-3.14 (m, 1H), 2.83-2.69 (m, 2H), 1.94-1.82 (m, 1H), 1.67-1.54 (m, 4H), 1.39 (dd,  $J$  = 14.1, 7.9 Hz, 2H), 1.33 (d,  $J$  = 3.4 Hz, 4H), 0.90 (t,  $J$  = 7.0 Hz, 3H).

$^{13}\text{C}$  NMR (151 MHz,  $\text{CDCl}_3$ )  $\delta$  = 167.71, 147.57, 131.59, 131.33, 128.67, 124.39 (q,  $J_{\text{CF}}$  = 277.8 Hz), 123.69, 121.18, 61.83, 40.51 (q,  $J_{\text{CF}}$  = 27.2 Hz), 40.30, 31.52, 29.00, 27.14, 26.45, 22.61, 14.05.

$^{19}\text{F}$  NMR (565 MHz,  $\text{CDCl}_3$ )  $\delta$  = -61.62 (s).

HRMS (ESI-TOF)  $m/z$  = 336.1537 [ $\text{M} + \text{Na}$ ] $^+$ , calcd for  $\text{C}_{17}\text{H}_{22}\text{F}_3\text{NNaO}$ : 336.1551

### 2-cyclopropyl-3-methyl-3-(2, 2, 2-trifluoroethyl)isoindolin-1-one

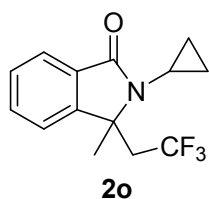

White solid, 65 % yield;  $^1\text{H}$  NMR (600 MHz,  $\text{CDCl}_3$ )  $\delta$  = 7.82 (d,  $J$  = 7.5 Hz, 1H), 7.57 (t,  $J$  = 7.5 Hz, 1H), 7.47 (t,  $J$  = 7.4 Hz, 1H), 7.41 (d,  $J$  = 7.7 Hz, 1H), 3.00 (dq,  $J$  = 15.7, 10.1 Hz, 1H), 2.79 (dq,  $J$  = 15.7, 10.0 Hz, 1H), 2.50-2.43 (m, 1H), 1.63 (s, 3H), 1.16-1.11 (m, 1H), 1.07-1.03 (m, 1H), 1.00-0.92 (m, 2H).

$^{13}\text{C}$  NMR (101 MHz,  $\text{CDCl}_3$ )  $\delta$  = 168.90, 147.14, 131.83, 131.28, 128.68, 124.63 (q,  $J_{\text{CF}}$  = 278.4 Hz), 123.88, 121.35, 63.15, 40.52 (q,  $J_{\text{CF}}$  = 27.1 Hz), 26.90, 21.99, 5.07, 4.70.

$^{19}\text{F}$  NMR (565 MHz,  $\text{CDCl}_3$ )  $\delta$  = -61.24 (s).

HRMS (ESI-TOF)  $m/z$  = 292.0902 [ $\text{M} + \text{Na}$ ] $^+$ , calcd for  $\text{C}_{14}\text{H}_{14}\text{F}_3\text{NNaO}$ : 292.0925

### 2-butyl-3-propyl-3-(2, 2, 2-trifluoroethyl)isoindolin-1-one

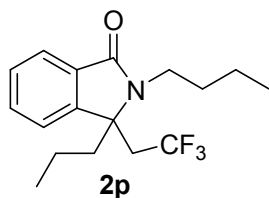

Yellow liquid, 57 % yield;  $^1\text{H}$  NMR (600 MHz,  $\text{CDCl}_3$ )  $\delta$  = 7.83 (d,  $J$  = 7.4 Hz, 1H), 7.55 (t,  $J$  = 7.4 Hz, 1H), 7.46 (t,  $J$  = 7.3 Hz, 1H), 7.35 (d,  $J$  = 7.5 Hz, 1H), 3.52-3.43 (m, 1H), 3.27-3.18 (m, 1H), 2.83-2.70

(m, 2H), 1.96-1.85 (m, 2H), 1.83-1.76 (m, 1H), 1.60-1.62 (m, 1H), 1.43-1.45 (m, 2H), 0.99 (t,  $J = 7.2$  Hz, 3H), 0.94-0.86 (m, 1H), 0.76 (t,  $J = 7.2$  Hz, 3H), 0.54 (dd,  $J = 14.6, 7.9$  Hz, 1H).

$^{13}\text{C}$  NMR (151 MHz,  $\text{CDCl}_3$ )  $\delta = 168.57, 145.63, 132.26, 131.52, 128.57, 124.52$  (q,  $J_{\text{CF}} = 278.2$  Hz), 123.59, 121.25, 65.07, 40.47 (q,  $J_{\text{CF}} = 27.2$  Hz), 40.16, 39.93, 30.71, 20.84, 15.48, 13.85, 13.57.

$^{19}\text{F}$  NMR (565 MHz,  $\text{CDCl}_3$ )  $\delta = -60.85$  (s).

HRMS (ESI-TOF)  $m/z = 336.1556$  [ $\text{M} + \text{Na}$ ] $^+$ , calcd for  $\text{C}_{17}\text{H}_{22}\text{F}_3\text{NNaO}$ : 336.1551

### (2-butyl-3-oxo-1-(2, 2, 2-trifluoroethyl)isoindolin-1-yl)methyl benzoate

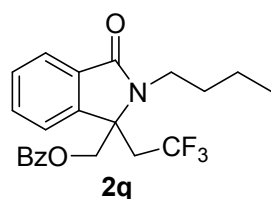

Yellow liquid, 42 % yield;  $^1\text{H}$  NMR (600 MHz,  $\text{CDCl}_3$ )  $\delta = 7.88$  (t,  $J = 6.4$  Hz, 3H), 7.59 (dd,  $J = 16.3, 7.2$  Hz, 2H), 7.55-7.48 (m, 2H), 7.45 (t,  $J = 7.8$  Hz, 2H), 4.53 (s, 2H), 3.77-3.79 (m, 1H), 3.24-3.26 (m, 1H), 2.95-2.97 (m, 2H), 1.95-1.85 (m, 1H), 1.60-1.53 (m, 1H), 1.46-1.35 (m, 2H), 0.91 (t,  $J = 7.4$  Hz, 3H).

$^{13}\text{C}$  NMR (101 MHz,  $\text{CDCl}_3$ )  $\delta = 168.24, 165.60, 143.35, 133.72, 132.08, 131.78, 129.51, 129.46, 128.80, 128.69, 124.51$  (q,  $J_{\text{CF}} = 278.8$  Hz), 123.89, 121.94, 67.66, 63.86, 40.94, 36.17 (q,  $J_{\text{CF}} = 24.2$  Hz), 31.01, 20.67, 13.72.

$^{19}\text{F}$  NMR (565 MHz,  $\text{CDCl}_3$ )  $\delta = -60.71$  (s).

HRMS (ESI-TOF)  $m/z = 428.1444$  [ $\text{M} + \text{Na}$ ] $^+$ , calcd for  $\text{C}_{22}\text{H}_{22}\text{F}_3\text{NNaO}_3$ : 428.1449

### 2'-butyl-2-(trifluoromethyl)spiro[cyclohexane-1,1'-isoindolin]-3'-one

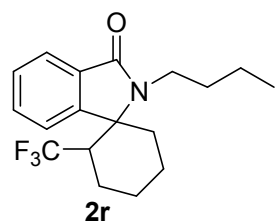

Yellow liquid, 57 % yield; The major isomer:  $^1\text{H}$  NMR (600 MHz,  $\text{CDCl}_3$ )  $\delta$  = 7.88 (dd,  $J$  = 6.0, 2.6 Hz, 1H), 7.73 (dd,  $J$  = 6.1, 2.0 Hz, 1H), 7.55-7.46 (m, 2H), 3.62-3.64 (m, 1H), 3.11-3.13 (m, 1H), 2.71-2.73 (m, 1H), 2.23-1.83 (m, 8H), 1.60-1.54 (m, 2H), 1.46-1.39 (m, 2H), 0.98 (t,  $J$  = 7.4 Hz, 3H).

$^{13}\text{C}$  NMR (101 MHz,  $\text{CDCl}_3$ )  $\delta$  = 167.65, 145.96, 132.28, 130.55, 128.46, 125.77 (q,  $J_{\text{CF}}$  = 281.9 Hz), 124.09, 123.82, 64.44, 45.48 (q,  $J_{\text{CF}}$  = 24.2 Hz), 40.12, 36.36, 31.14, 24.05, 22.83, 22.04, 20.80, 13.81.

$^{19}\text{F}$  NMR (565 MHz,  $\text{CDCl}_3$ )  $\delta$  = -67.20 (s).

HRMS (ESI-TOF)  $m/z$  = 348.1546  $[\text{M} + \text{Na}]^+$ , calcd for  $\text{C}_{18}\text{H}_{22}\text{F}_3\text{NNaO}$ : 348.1551

### (E)-N-butyl-N-(3,3,3-trifluoro-1-phenylprop-1-enyl)benzamide

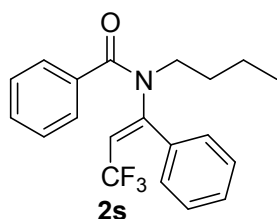

Yellow liquid, 66 % yield;  $^1\text{H}$  NMR (600 MHz,  $\text{CDCl}_3$ )  $\delta$  = 7.45 (d,  $J$  = 7.3 Hz, 2H), 7.39 (dd,  $J$  = 10.5, 4.2 Hz, 2H), 7.35 (d,  $J$  = 5.9 Hz, 4H), 7.28 (t,  $J$  = 7.6 Hz, 2H), 5.33 (q,  $J$  = 8.3 Hz, 1H), 3.66-3.54 (m, 2H), 1.64 (dd,  $J$  = 15.5, 7.5 Hz, 2H), 1.31 (dd,  $J$  = 15.1, 7.5 Hz, 2H), 0.90 (t,  $J$  = 7.4 Hz, 3H).

$^{13}\text{C}$  NMR (151 MHz,  $\text{CDCl}_3$ )  $\delta$  = 171.45, 151.21 (q,  $J_{\text{CF}}$  = 6.0 Hz), 135.89, 133.76, 130.44, 130.31, 129.05, 129.04, 128.47, 128.20, 127.71, 113.75 (q,  $J_{\text{CF}}$  = 35.2 Hz), 48.24, 30.06, 20.11, 13.75.

$^{19}\text{F}$  NMR (565 MHz,  $\text{CDCl}_3$ )  $\delta$  = -55.30 (s).

HRMS (ESI-TOF)  $m/z$  = 370.1384  $[\text{M} + \text{Na}]^+$ , calcd for  $\text{C}_{20}\text{H}_{20}\text{F}_3\text{NNaO}$ : 370.1395

### (E)-N-butyl-N-(3,3,3-trifluoroprop-1-enyl)benzamide

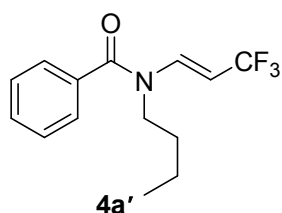

Yellow liquid, 64 % yield;  $^1\text{H}$  NMR (400 MHz,  $\text{CDCl}_3$ )  $\delta$  = 7.56-7.43 (m, 5H), 7.39 (d,  $J$  = 13.5 Hz, 1H), 5.09 (dd,  $J$  = 14.2, 6.2 Hz, 1H), 3.82-3.69 (m, 2H), 1.72-1.61 (m, 2H), 1.40 (dd,  $J$  = 15.0, 7.4 Hz, 2H), 0.97 (t,  $J$  = 7.3 Hz, 3H).

$^{13}\text{C}$  NMR (101 MHz,  $\text{CDCl}_3$ )  $\delta$  = 171.10, 136.86, 133.89, 131.21, 128.79, 128.01, 124.36 (q,  $J_{\text{CF}}$  = 267.4 Hz), 96.52 (d,  $J_{\text{CF}}$  = 34.3 Hz), 43.81, 28.46, 20.20, 13.76.

$^{19}\text{F}$  NMR (377 MHz,  $\text{CDCl}_3$ )  $\delta$  = -59.97 (s).

HRMS (ESI-TOF)  $m/z$  = 294.1082  $[\text{M} + \text{Na}]^+$ , calcd for  $\text{C}_{14}\text{H}_{16}\text{F}_3\text{NNaO}$ : 294.1082

### (E)-N-propyl-N-(3,3,3-trifluoroprop-1-enyl)benzamide

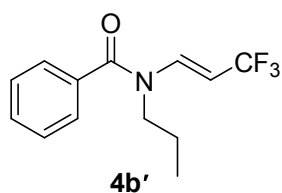

Yellow liquid, 72 % yield;  $^1\text{H}$  NMR (600 MHz,  $\text{CDCl}_3$ )  $\delta$  = 7.52 (dd,  $J$  = 10.8, 4.2 Hz, 1H), 7.50-7.44 (m, 4H), 7.39 (d,  $J$  = 7.5 Hz, 1H), 5.08-5.10 (m, 1H), 3.76-3.69 (m, 2H), 1.74-1.67 (m, 2H), 0.98 (t,  $J$  = 7.4 Hz, 3H).

$^{13}\text{C}$  NMR (151 MHz,  $\text{CDCl}_3$ )  $\delta$  = 171.12, 136.84, 133.86, 131.20, 128.78, 128.00, 124.33 (q,  $J_{\text{CF}}$  = 267.4 Hz), 96.54 (q,  $J_{\text{CF}}$  = 34.7 Hz), 45.49, 19.69, 11.29.

$^{19}\text{F}$  NMR (565 MHz,  $\text{CDCl}_3$ )  $\delta$  = -60.03 (s).

HRMS (ESI-TOF)  $m/z$  = 280.0922  $[\text{M} + \text{Na}]^+$ , calcd for  $\text{C}_{13}\text{H}_{14}\text{F}_3\text{NNaO}$ : 280.0925

### (E)-N-cyclohexyl-N-(3,3,3-trifluoroprop-1-enyl)benzamide

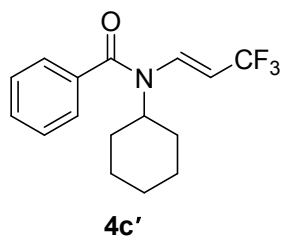

Yellow liquid, 47 % yield;  $^1\text{H}$  NMR (400 MHz,  $\text{CDCl}_3$ )  $\delta$  = 7.55-7.40 (m, 5H), 7.10 (d,  $J$  = 14.5 Hz, 1H), 5.40 (m, 1H), 3.97 (m, 1H), 2.06 (m, 2H), 1.88 (d,  $J$  = 13.3 Hz, 2H), 1.81 (d,  $J$  = 11.1 Hz, 2H), 1.39-1.19 (m, 4H).

$^{13}\text{C}$  NMR (101 MHz,  $\text{CDCl}_3$ )  $\delta$  = 171.92, 136.10, 135.09, 131.11, 128.71, 127.92, 124.40 (q,  $J_{\text{CF}}$  = 267.8 Hz), 99.48 (q,  $J_{\text{CF}}$  = 34.3 Hz), 57.66, 29.42, 26.19, 25.27.

$^{19}\text{F}$  NMR (377 MHz,  $\text{CDCl}_3$ )  $\delta$  = -60.50 (s).

HRMS (ESI-TOF)  $m/z$  = 320.1221  $[\text{M} + \text{Na}]^+$ , calcd for  $\text{C}_{16}\text{H}_{18}\text{F}_3\text{NNaO}$ : 320.1238

### (E)-N-butyl-4-methoxy-N-(3,3,3-trifluoroprop-1-enyl)benzamide

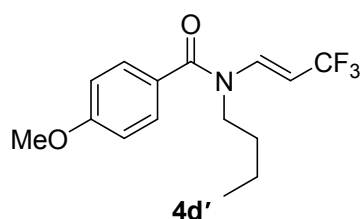

Colorless liquid, 68 % yield;  $^1\text{H}$  NMR (400 MHz,  $\text{CDCl}_3$ )  $\delta$  = 7.44 (t,  $J$  = 9.0 Hz, 3H), 6.96 (d,  $J$  = 8.7 Hz, 2H), 5.06 (m, 1H), 3.87 (s, 3H), 3.80-3.71 (m, 2H), 1.64 (dd,  $J$  = 14.5, 7.0 Hz, 2H), 1.39 (m, 2H), 0.97 (t,  $J$  = 7.3 Hz, 3H).

$^{13}\text{C}$  NMR (101 MHz,  $\text{CDCl}_3$ )  $\delta$  = 170.85, 162.02, 137.42, 130.45, 125.79, 124.50 (q,  $J_{\text{CF}}$  = 267.3 Hz), 114.04, 95.85 (q,  $J_{\text{CF}}$  = 34.3 Hz), 55.46, 43.99, 28.46, 20.23, 13.76.

$^{19}\text{F}$  NMR (377 MHz,  $\text{CDCl}_3$ )  $\delta$  = -59.75 (s).

HRMS (ESI-TOF)  $m/z$  = 324.1155  $[\text{M} + \text{Na}]^+$ , calcd for  $\text{C}_{15}\text{H}_{18}\text{F}_3\text{NNaO}_2$ : 324.1187

### 2-butyl-5-methyl-3-(2,2,2-trifluoroethyl)isoindolin-1-one

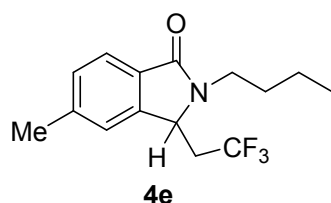

Yellow liquid, 33 % yield;  $^1\text{H}$  NMR (600 MHz,  $\text{CDCl}_3$ )  $\delta$  = 7.73 (d,  $J$  = 8.3 Hz, 1H), 7.30 (d,  $J$  = 7.1 Hz, 2H), 4.70 (dd,  $J$  = 6.6, 3.4 Hz, 1H), 4.07-4.09 (m, 1H), 3.11-3.13 (m, 1H), 2.78-2.68 (m, 1H), 2.54-2.56 (m, 1H), 2.47 (s, 3H), 1.64-1.57 (m, 2H), 1.35 (dd,  $J$  = 15.0, 7.5 Hz, 2H), 0.95 (t,  $J$  = 7.4 Hz, 3H).

$^{13}\text{C}$  NMR (151 MHz,  $\text{CDCl}_3$ )  $\delta$  = 168.13, 144.37, 142.58, 129.81, 129.37, 125.74 (q,  $J_{\text{CF}}$  = 277.8 Hz), 123.60, 123.07, 53.42, 39.57, 36.66 (q,  $J_{\text{CF}}$  = 28.1 Hz), 30.09, 21.99, 20.07, 13.75.

$^{19}\text{F}$  NMR (565 MHz,  $\text{CDCl}_3$ )  $\delta$  = -62.59 (s).

HRMS (ESI-TOF)  $m/z$  = 308.1241  $[\text{M} + \text{Na}]^+$ , calcd for  $\text{C}_{15}\text{H}_{18}\text{F}_3\text{NNaO}$ : 308.1238

### (E)-N-butyl-4-methyl-N-(3,3,3-trifluoroprop-1-enyl)benzamide

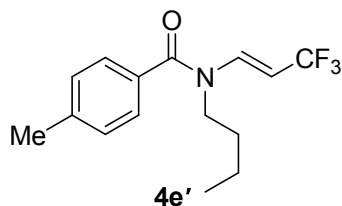

Yellow liquid, 36 % yield;  $^1\text{H}$  NMR (400 MHz,  $\text{CDCl}_3$ )  $\delta$  = 7.41 (d,  $J$  = 13.9 Hz, 1H), 7.36 (d,  $J$  = 8.0 Hz, 2H), 7.26 (d,  $J$  = 7.9 Hz, 2H), 5.06-5.08 (m, 1H), 3.80-3.69 (m, 2H), 2.41 (s, 3H), 1.67-1.61 (m, 2H), 1.39 (dd,  $J$  = 15.1, 7.5 Hz, 2H), 0.97 (t,  $J$  = 7.3 Hz, 3H).

$^{13}\text{C}$  NMR (101 MHz,  $\text{CDCl}_3$ )  $\delta$  = 171.21, 141.75, 137.17, 130.89, 129.38, 128.23, 124.44 (q,  $J_{\text{CF}}$  = 267.4 Hz), 96.09 (q,  $J_{\text{CF}}$  = 35.3 Hz), 43.81, 28.45, 21.51, 20.22, 13.76.

$^{19}\text{F}$  NMR (376 MHz,  $\text{CDCl}_3$ )  $\delta$  = -59.84 (s).

HRMS (ESI-TOF)  $m/z$  = 308.1203  $[\text{M} + \text{Na}]^+$ , calcd for  $\text{C}_{15}\text{H}_{18}\text{F}_3\text{NNaO}$ : 308.1238

### 2-butyl-7-methyl-3-(2,2,2-trifluoroethyl)isoindolin-1-one

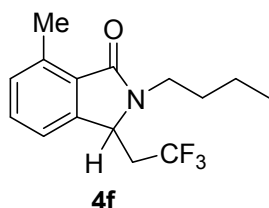

Yellow liquid, 70 % yield;  $^1\text{H}$  NMR (600 MHz,  $\text{CDCl}_3$ )  $\delta$  = 7.43 (t,  $J$  = 7.6 Hz, 1H), 7.32 (d,  $J$  = 7.6 Hz, 1H), 7.23 (d,  $J$  = 7.5 Hz, 1H), 4.69 (dd,  $J$  = 6.3, 3.5 Hz, 1H), 4.04-4.06 (m, 1H), 3.10-3.12 (m, 1H), 2.77-2.65 (m, 4H), 2.63-2.50 (m, 1H), 1.66-1.60 (m, 1H), 1.56-1.58 (m, 1H), 1.40-1.33 (m, 2H), 0.95 (t,  $J$  = 7.4 Hz, 3H).

$^{13}\text{C}$  NMR (101 MHz,  $\text{CDCl}_3$ )  $\delta$  = 168.83, 144.54, 137.85, 131.28, 130.81, 128.89, 125.70 (q,  $J_{\text{CF}}$  = 277.8 Hz), 119.89, 53.02, 39.54, 36.91 (q,  $J_{\text{CF}}$  = 28.1 Hz), 30.09, 20.14, 17.25, 13.73.

$^{19}\text{F}$  NMR (565 MHz,  $\text{CDCl}_3$ )  $\delta = -62.55$  (s).

HRMS (ESI-TOF)  $m/z = 308.1218$   $[\text{M} + \text{Na}]^+$ , calcd for  $\text{C}_{15}\text{H}_{18}\text{F}_3\text{NNaO}$ : 308.1238

### 2-butyl-5-chloro-3-(2, 2, 2-trifluoroethyl)isoindolin-1-one

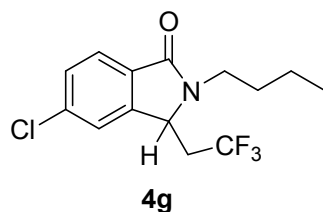

Yellow liquid, 63 % yield;  $^1\text{H}$  NMR (600 MHz,  $\text{CDCl}_3$ )  $\delta = 7.78$  (d,  $J = 8.1$  Hz, 1H), 7.52 (s, 1H), 7.49 (dd,  $J = 8.1, 1.6$  Hz, 1H), 4.73 (dd,  $J = 6.9, 3.2$  Hz, 1H), 4.07-4.09 (m, 1H), 3.17-3.08 (m, 1H), 2.76 (dq,  $J = 19.0, 11.2, 3.3$  Hz, 1H), 2.63-2.52 (m, 1H), 1.66-1.61 (m, 1H), 1.61-1.56 (m, 1H), 1.35 (dd,  $J = 15.0, 7.5$  Hz, 2H), 0.95 (t,  $J = 7.4$  Hz, 3H).

$^{13}\text{C}$  NMR (101 MHz,  $\text{CDCl}_3$ )  $\delta = 166.95, 145.38, 138.26, 130.46, 129.52, 125.42$  (d,  $J_{\text{CF}} = 277.3$  Hz), 125.05, 123.19, 53.37, 39.75, 36.27 (q,  $J_{\text{CF}} = 28.4$  Hz), 30.01, 20.04, 13.68.

$^{19}\text{F}$  NMR (565 MHz,  $\text{CDCl}_3$ )  $\delta = -62.51$  (s).

HRMS (ESI-TOF)  $m/z = 328.0697$   $[\text{M} + \text{Na}]^+$ , calcd for  $\text{C}_{14}\text{H}_{15}\text{ClF}_3\text{NNaO}$ : 328.0692

### 5-bromo-2-butyl-3-(2, 2, 2-trifluoroethyl)isoindolin-1-one

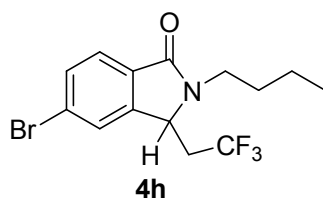

Yellow liquid, 54 % yield;  $^1\text{H}$  NMR (600 MHz,  $\text{CDCl}_3$ )  $\delta = 7.72$  (d,  $J = 8.0$  Hz, 1H), 7.68 (s, 1H), 7.65 (dd,  $J = 8.0, 1.5$  Hz, 1H), 4.73 (dd,  $J = 6.8, 3.2$  Hz, 1H), 4.12-4.03 (m, 1H), 3.15-3.07 (m, 1H), 2.82-2.70 (m, 1H), 2.57-2.59 (m, 1H), 1.66-1.56 (m, 2H), 1.35 (dd,  $J = 15.0, 7.5$  Hz, 2H), 0.95 (t,  $J = 7.4$  Hz, 3H).

$^{13}\text{C}$  NMR (151 MHz,  $\text{CDCl}_3$ )  $\delta = 167.08, 145.57, 132.41, 130.88, 126.56, 126.14, 125.42$  (q,  $J_{\text{CF}} = 277.4$  Hz), 125.27, 77.26, 77.05, 76.84, 53.29, 39.71, 36.21 (q,  $J_{\text{CF}} = 28.4$  Hz), 29.99, 20.04, 13.72.

$^{19}\text{F}$  NMR (565 MHz,  $\text{CDCl}_3$ )  $\delta = -62.51$  (s).

HRMS (ESI-TOF)  $m/z = 372.0169$   $[M + Na]^+$ , calcd for  $C_{14}H_{15}BrF_3NNaO$ : 372.0187

**(E)-N-butyl-N-(3,3,3-trifluoroprop-1-enyl)furan-2-carboxamide**

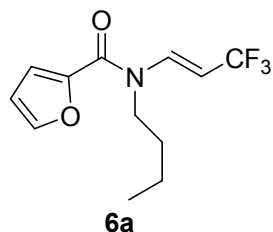

Yellow liquid, 60 % yield;  $^1H$  NMR (400 MHz,  $CDCl_3$ )  $\delta = 7.96$  (d,  $J = 14.2$  Hz, 1H), 7.60 (s, 1H), 7.16 (d,  $J = 3.3$  Hz, 1H), 6.62-6.50 (m, 1H), 5.17-5.19 (m, 1H), 3.85-3.63 (m, 2H), 1.73-1.61 (m, 2H), 1.46-1.33 (m, 2H), 0.98 (t,  $J = 7.3$  Hz, 3H).

$^{13}C$  NMR (101 MHz,  $CDCl_3$ )  $\delta = 159.17, 146.49, 145.57, 136.19, 124.54$  (q,  $J_{CF} = 268.7$  Hz), 119.47, 111.96, 97.35 (q,  $J_{CF} = 34.4$  Hz), 44.38, 28.67, 20.16, 13.71.

$^{19}F$  NMR (377 MHz,  $CDCl_3$ )  $\delta = -59.93$  (s).

HRMS (ESI-TOF)  $m/z = 284.0877$   $[M + Na]^+$ , calcd for  $C_{12}H_{14}F_3NNaO_2$ : 284.0874

**(E)-N-butyl-N-(4,4,4-trifluorobut-2-en-2-yl)furan-2-carboxamide**

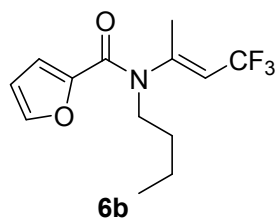

Yellow liquid, 60 % yield;  $^1H$  NMR (600 MHz,  $CDCl_3$ )  $\delta = 7.44$  (s, 1H), 7.05 (d,  $J = 3.5$  Hz, 1H), 6.46 (dd,  $J = 3.4, 1.7$  Hz, 1H), 5.40 (q,  $J = 7.9$  Hz, 1H), 3.63-3.56 (m, 2H), 2.16 (s, 3H), 1.59 (dd,  $J = 15.5, 7.8$  Hz, 2H), 1.38 (dd,  $J = 15.1, 7.5$  Hz, 2H), 0.96 (t,  $J = 7.4$  Hz, 3H).

$^{13}C$  NMR (151 MHz,  $CDCl_3$ )  $\delta = 158.57, 149.51$  (q,  $J_{CF} = 6.0$  Hz), 147.52, 144.26, 122.87 (q,  $J_{CF} = 270.1$  Hz), 117.05 (q,  $J_{CF} = 34.7$  Hz), 117.10, 111.60, 46.77, 29.87, 20.08, 18.24, 13.77.

$^{19}F$  NMR (565 MHz,  $CDCl_3$ )  $\delta = -58.22$  (s).

HRMS (ESI-TOF)  $m/z = 298.1055$   $[M + Na]^+$ , calcd for  $C_{13}H_{16}F_3NNaO_2$ : 298.1031



## (C) Spectra

2a.  $^1\text{H}$  NMR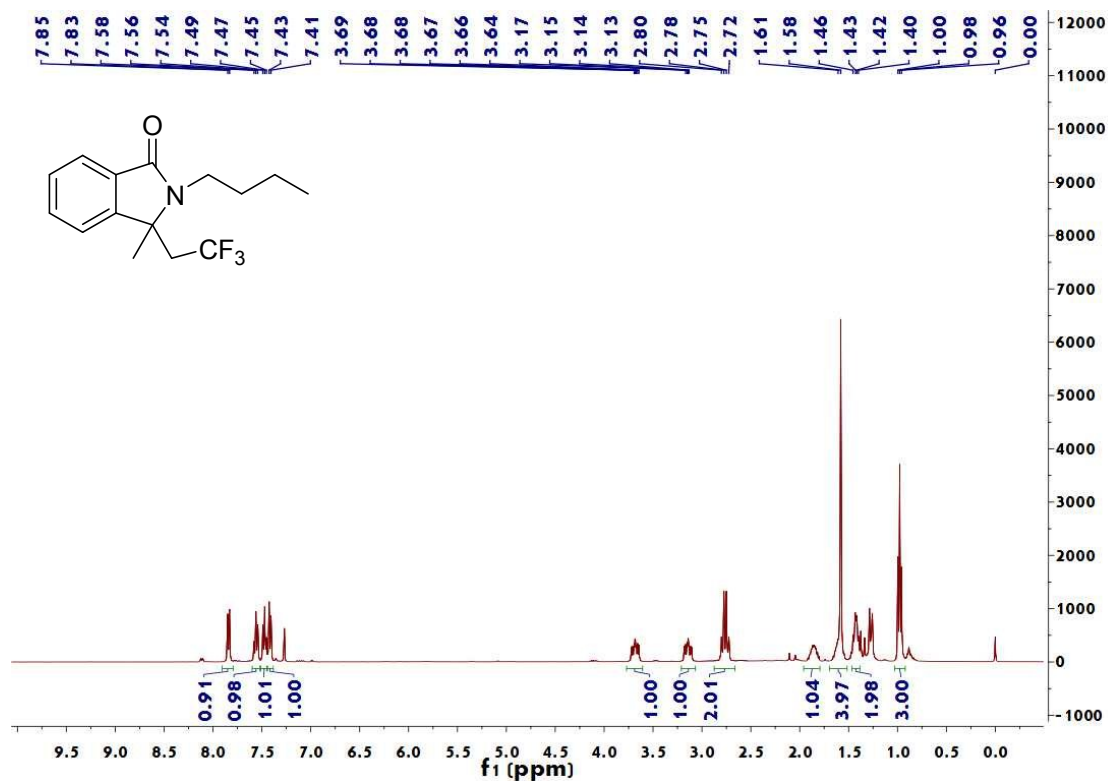2a.  $^{13}\text{C}$  NMR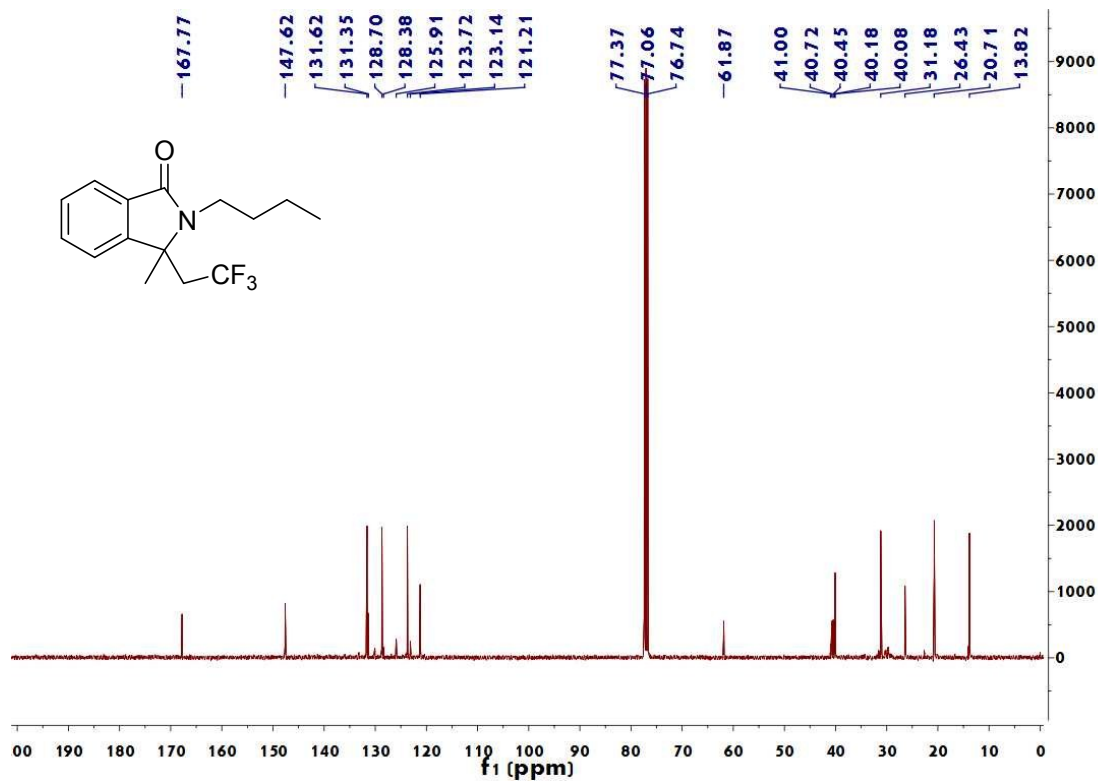

2b.  $^1\text{H}$  NMR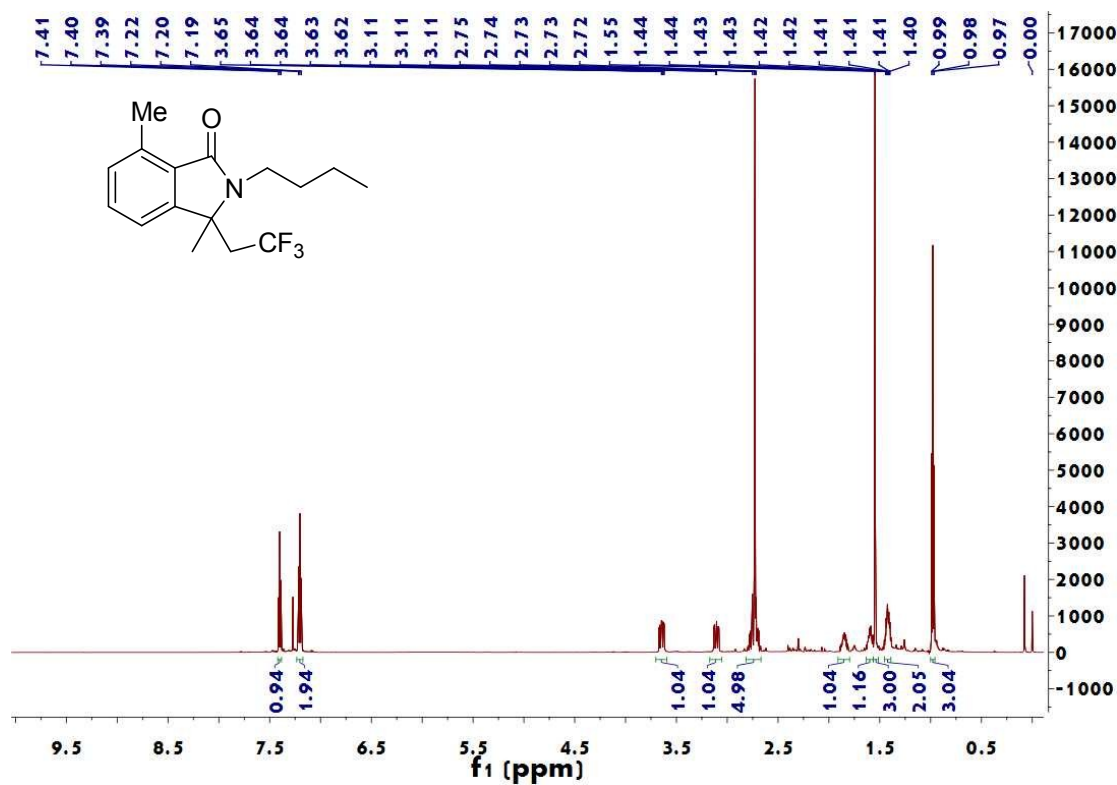2b.  $^{13}\text{C}$  NMR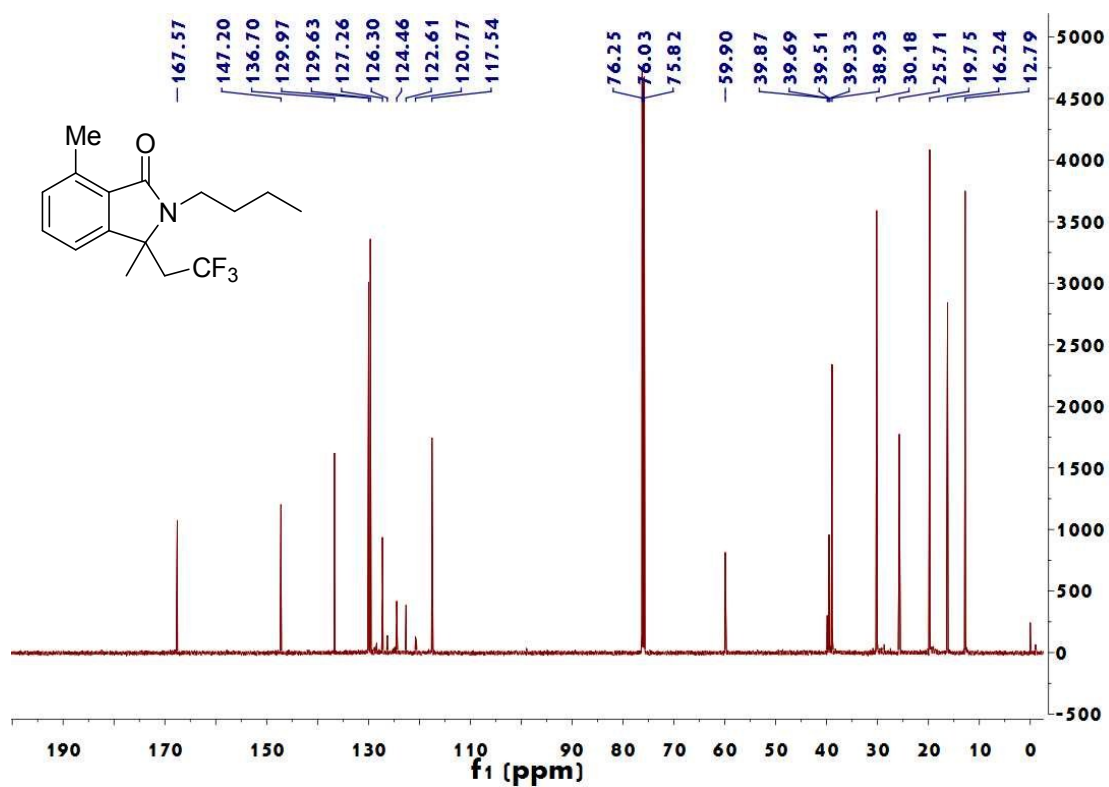

2c.  $^1\text{H}$  NMR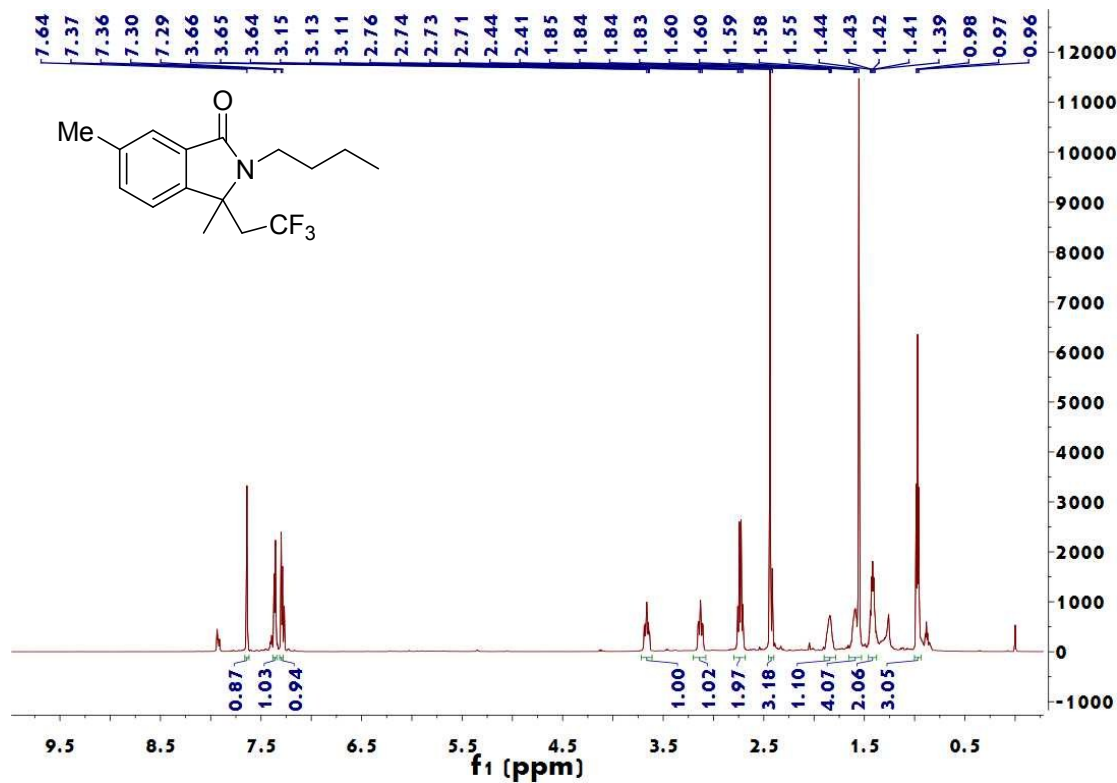2c.  $^{13}\text{C}$  NMR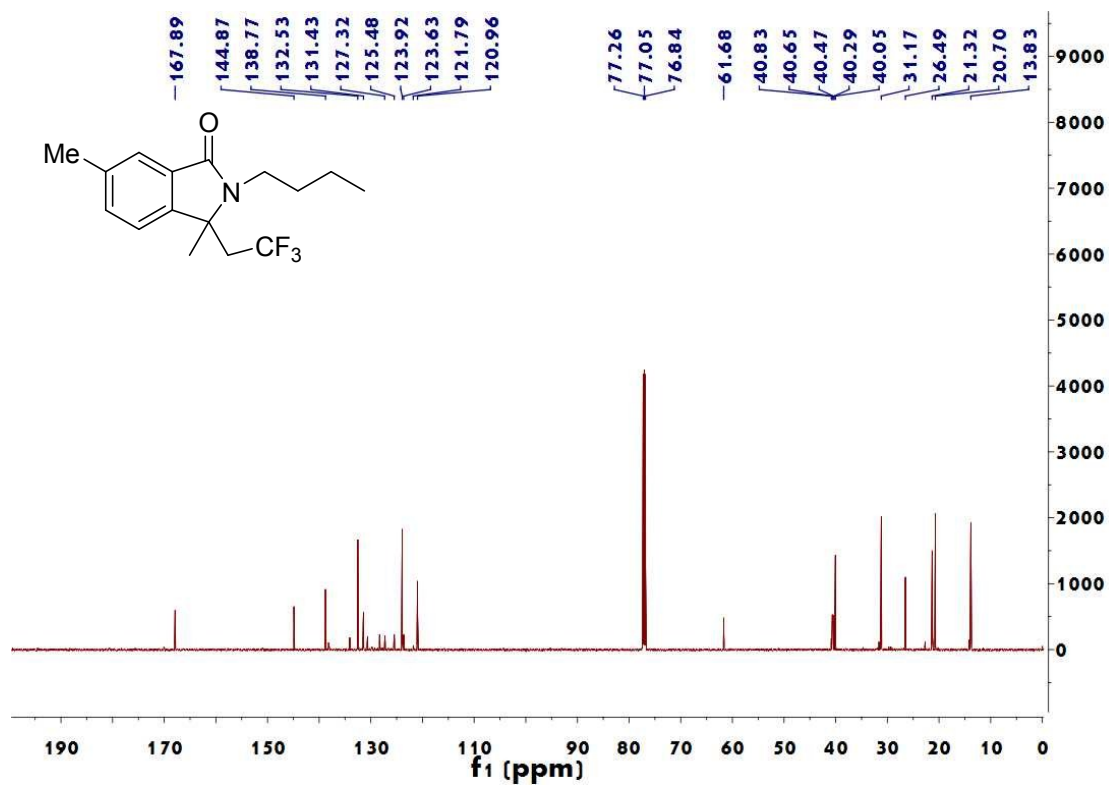

2d.  $^1\text{H}$  NMR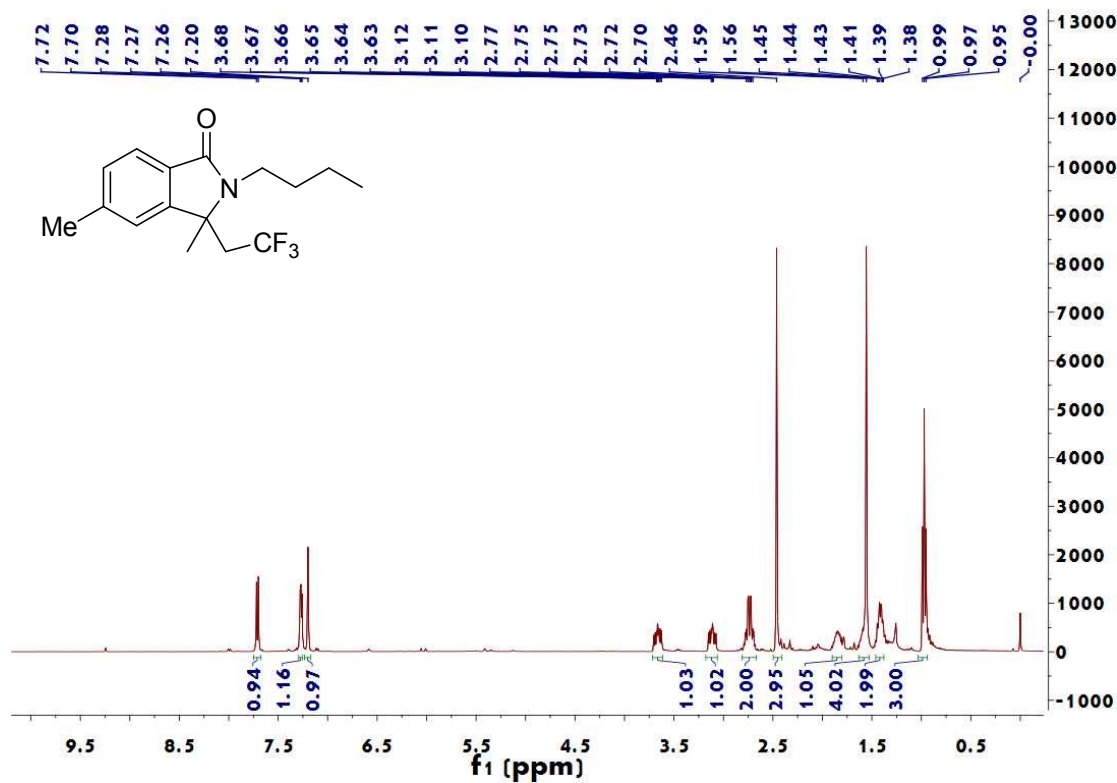2d.  $^{13}\text{C}$  NMR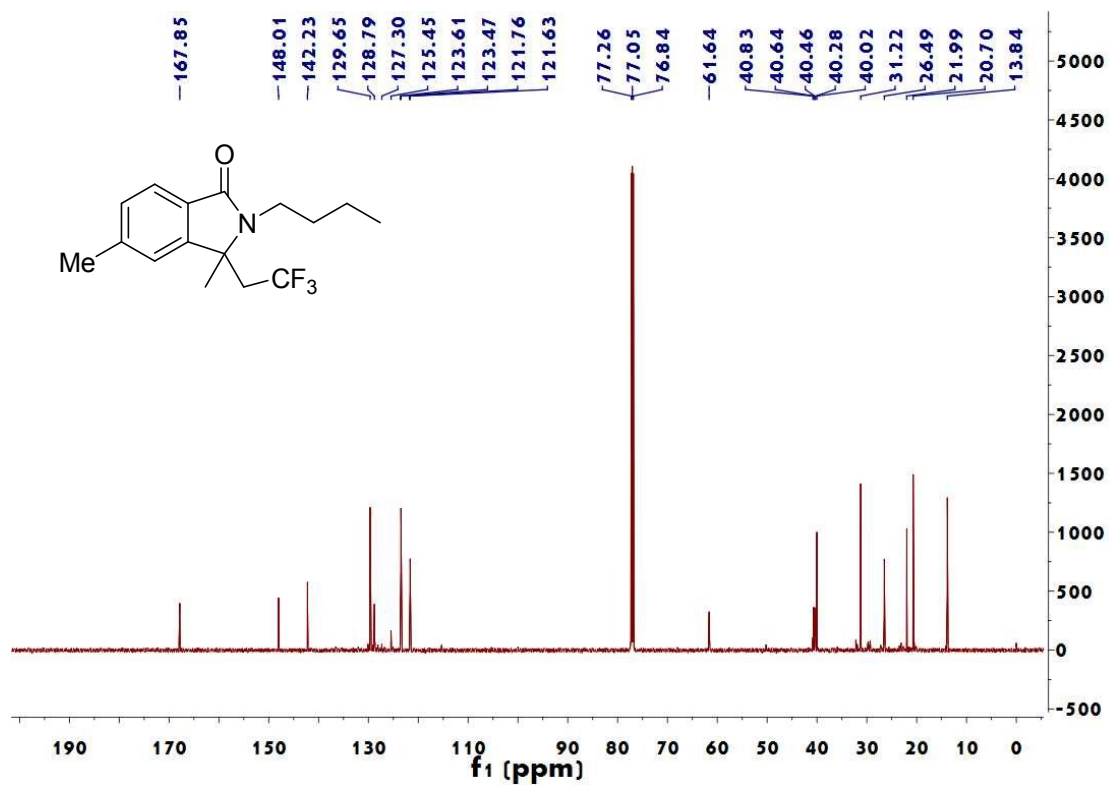

2e.  $^1\text{H}$  NMR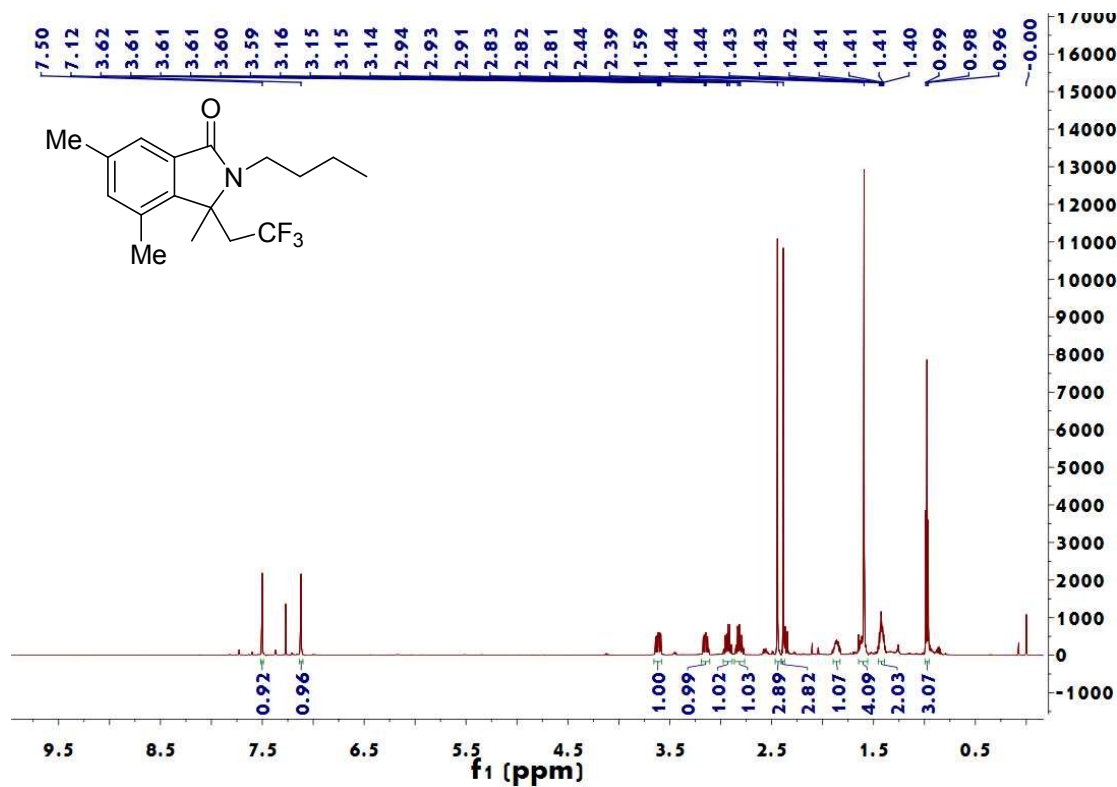2e.  $^{13}\text{C}$  NMR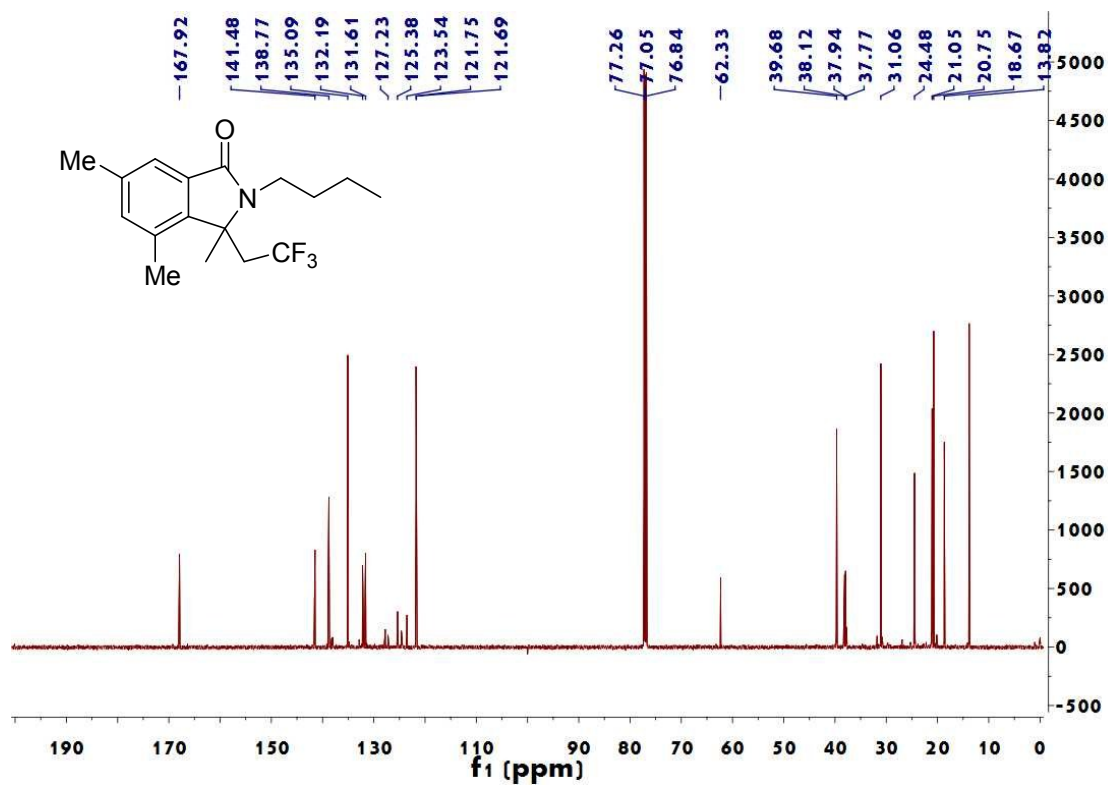

2f.  $^1\text{H}$  NMR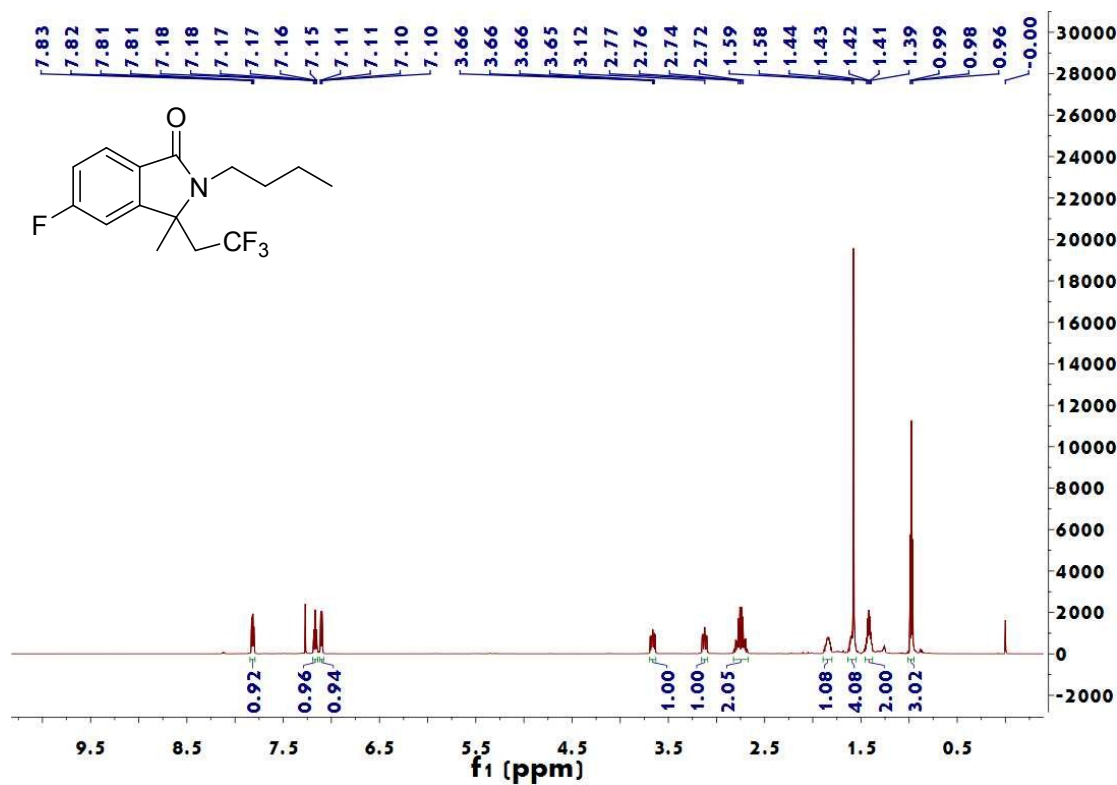2f.  $^{13}\text{C}$  NMR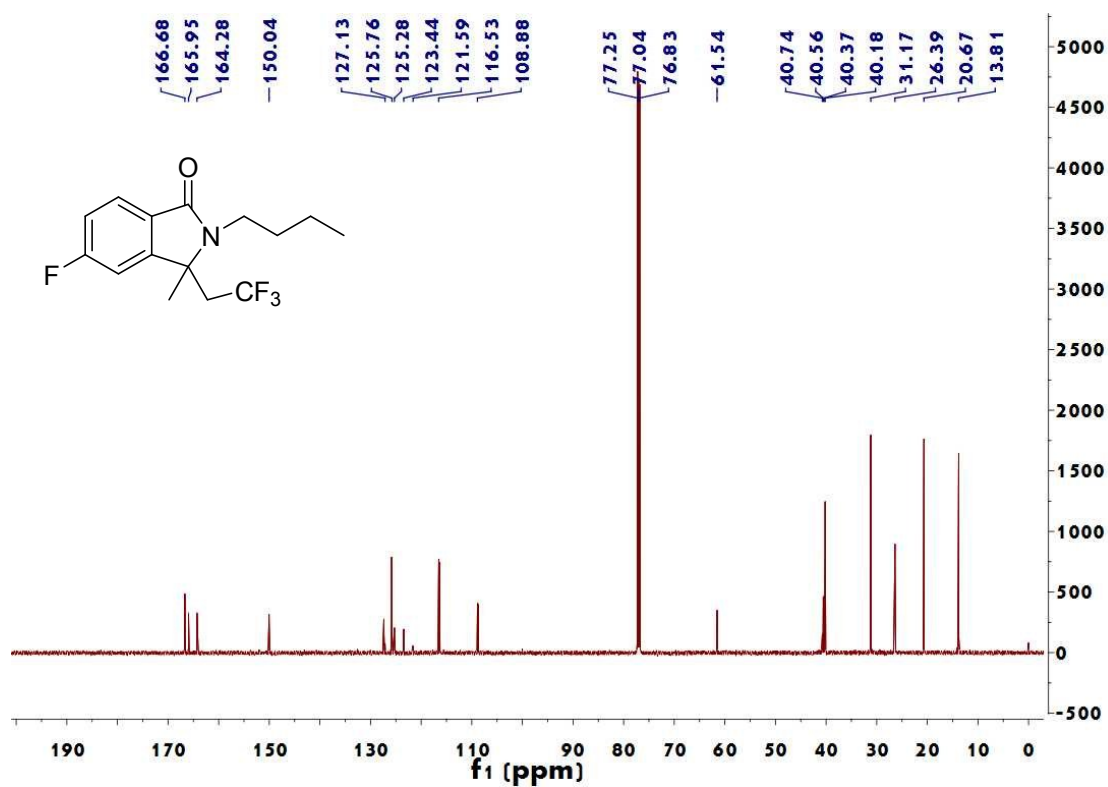

2g.  $^1\text{H}$  NMR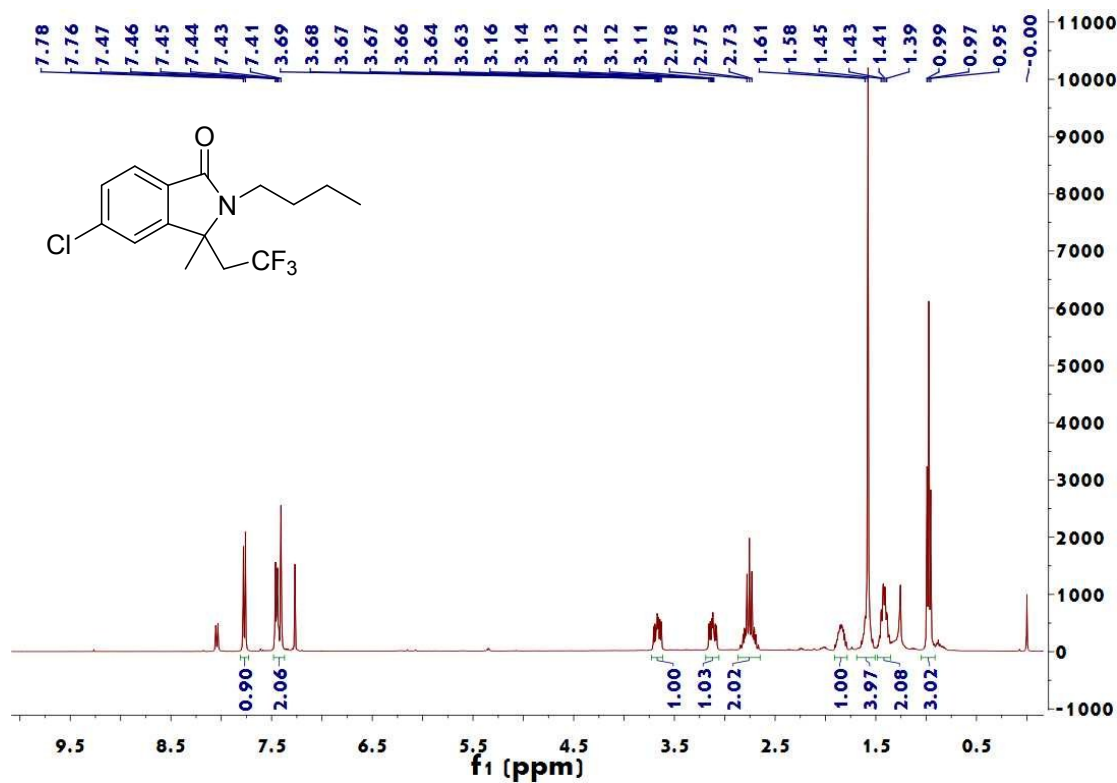2g.  $^{13}\text{C}$  NMR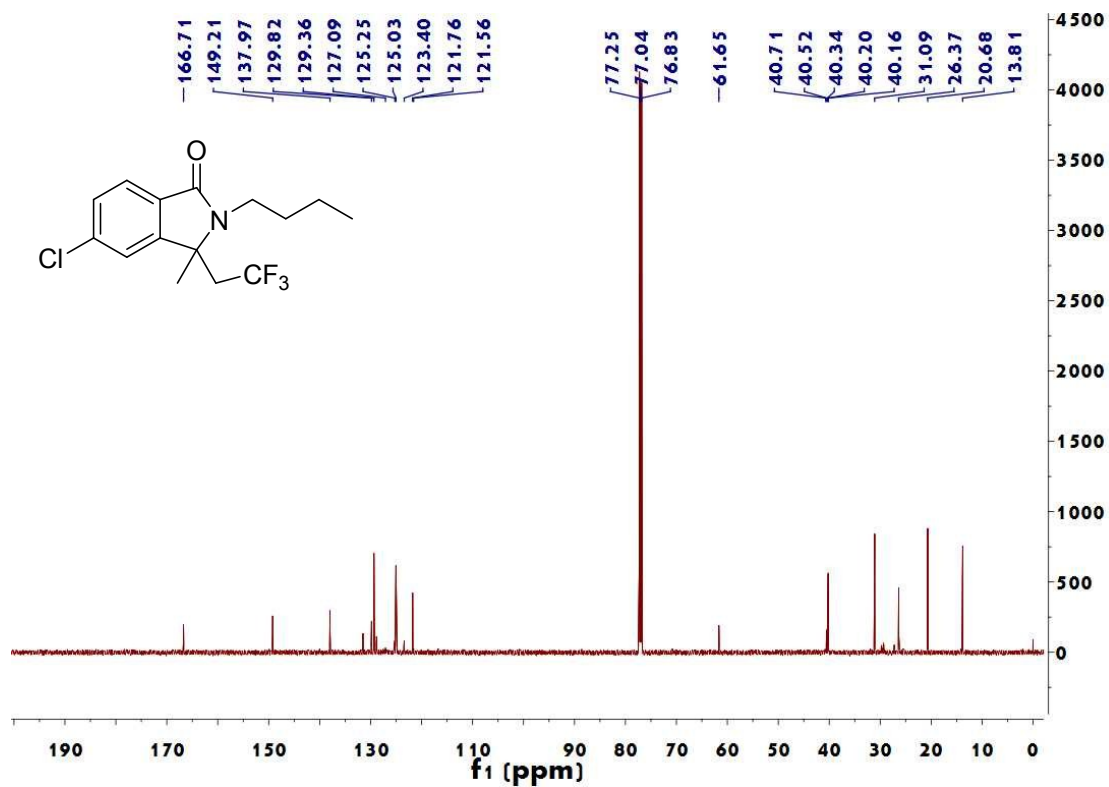

2h.  $^1\text{H}$  NMR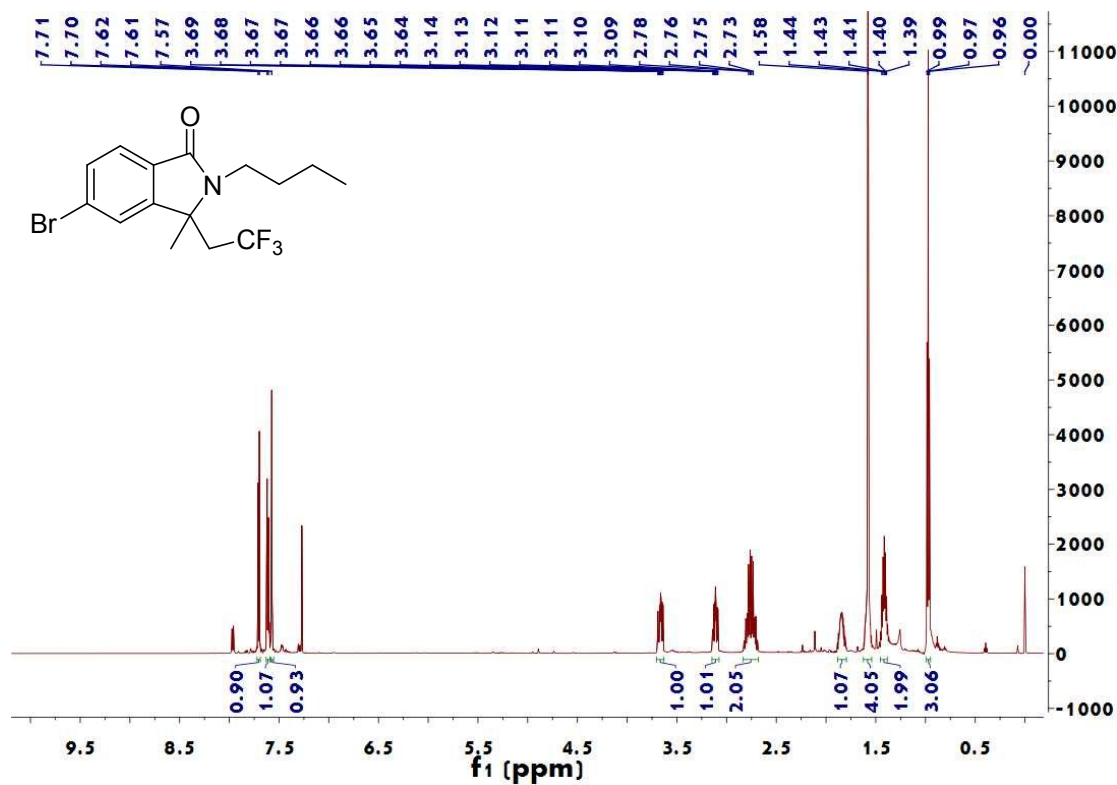2h.  $^{13}\text{C}$  NMR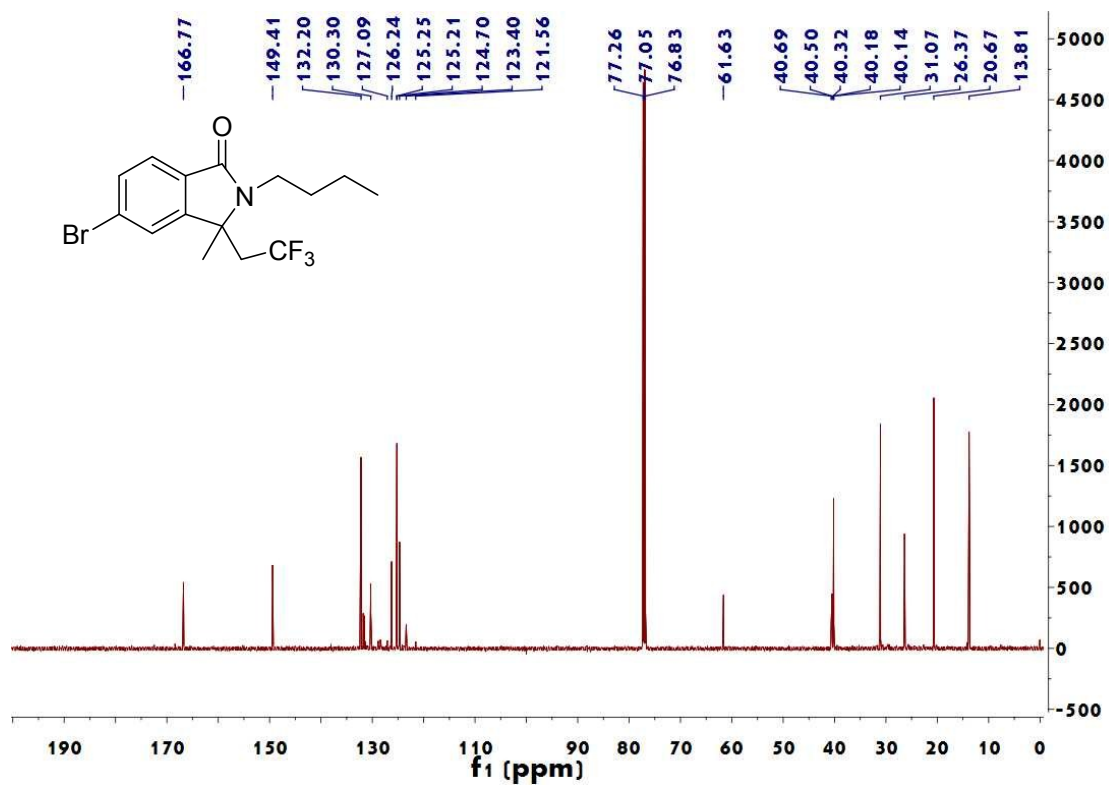



2i.  $^1\text{H}$  NMR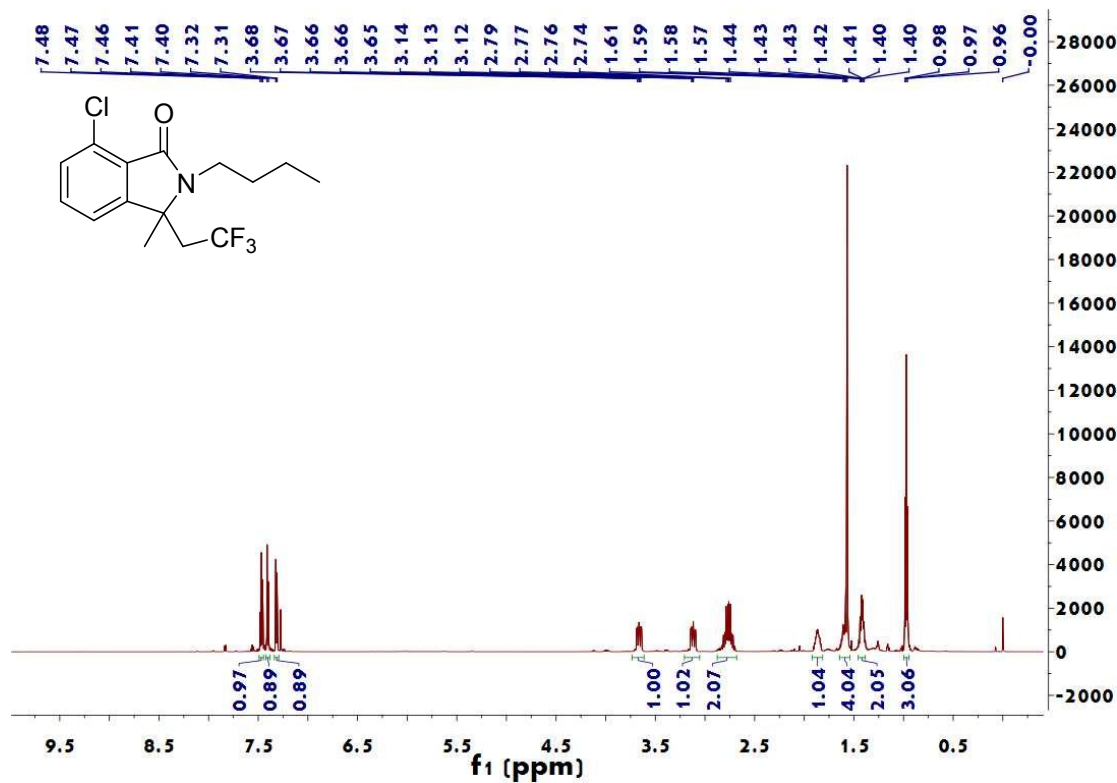2i.  $^{13}\text{C}$  NMR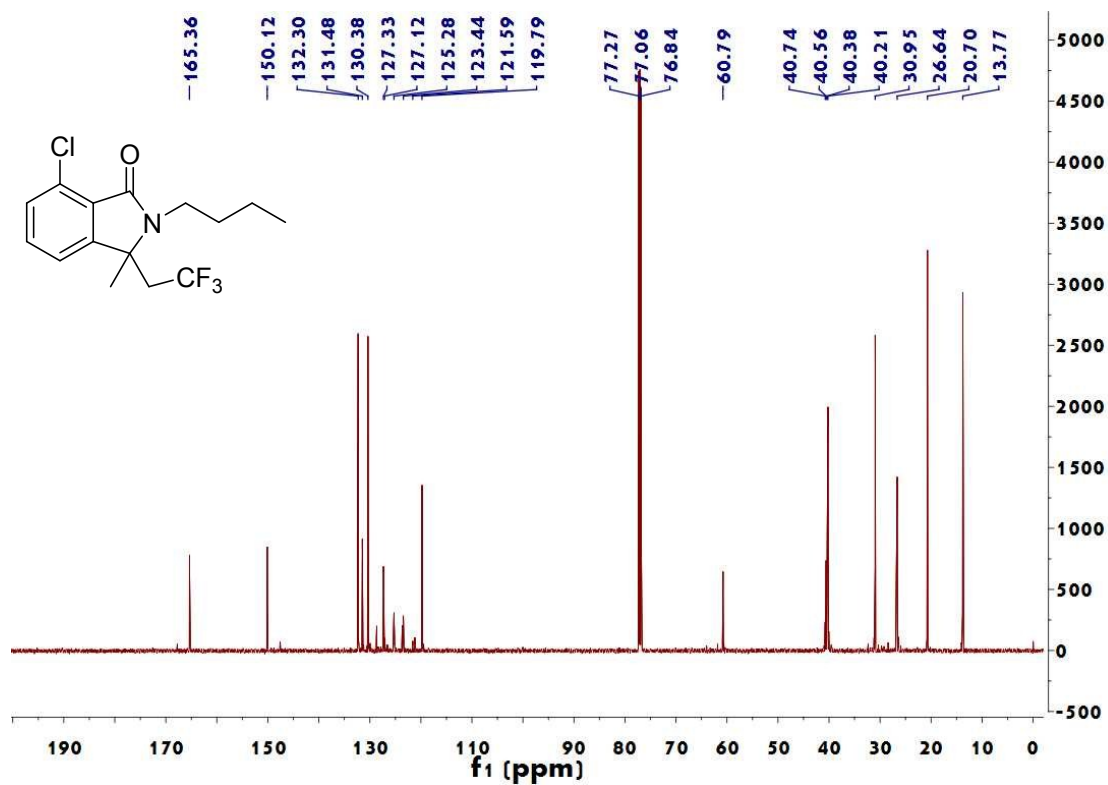

2j.  $^1\text{H}$  NMR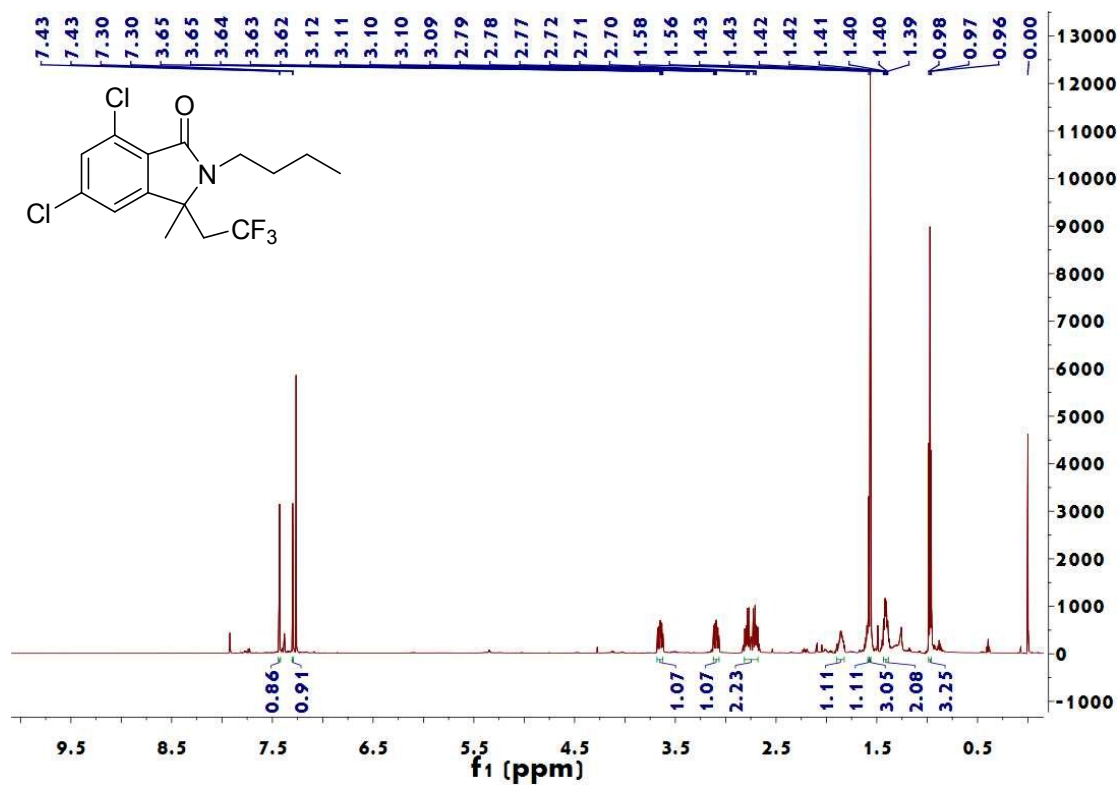2j.  $^{13}\text{C}$  NMR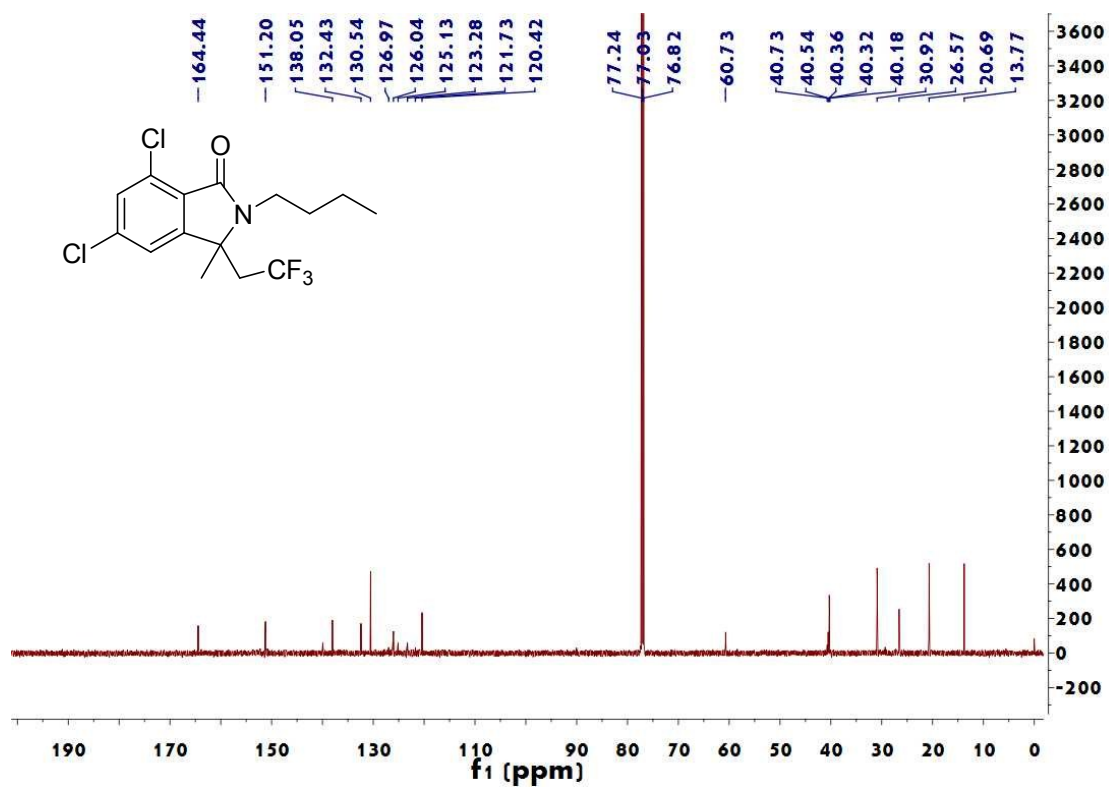

2k.  $^1\text{H}$  NMR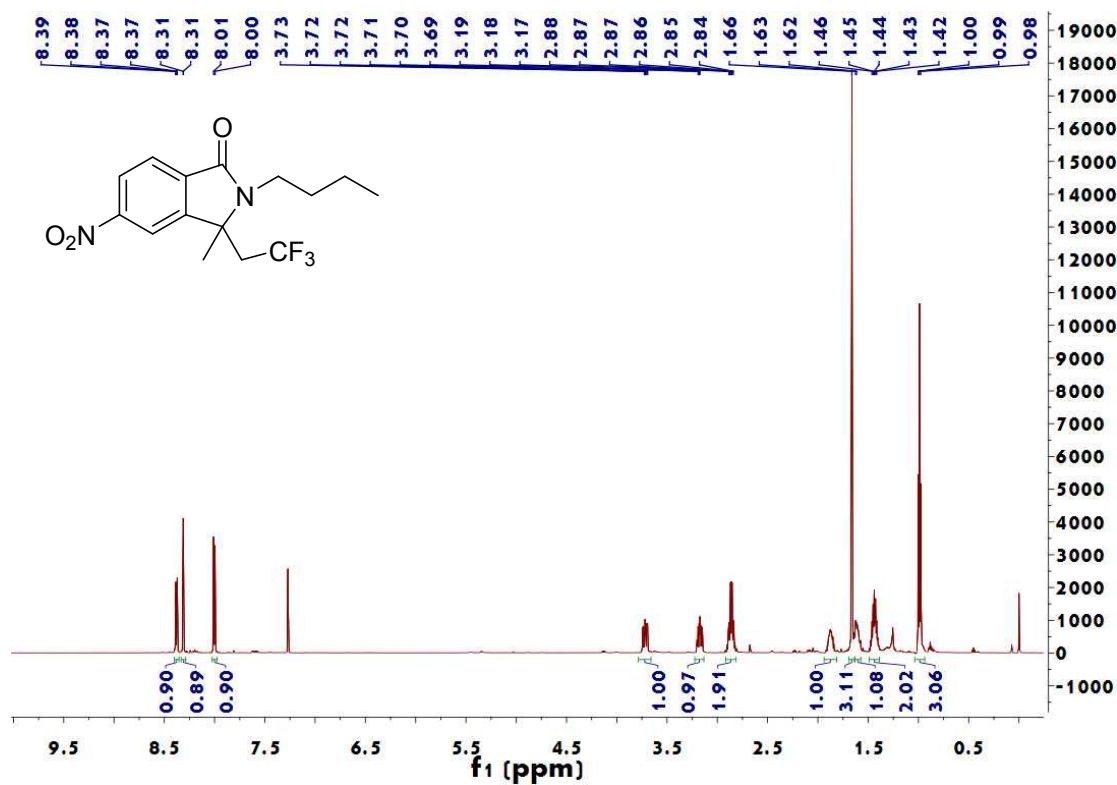2k.  $^{13}\text{C}$  NMR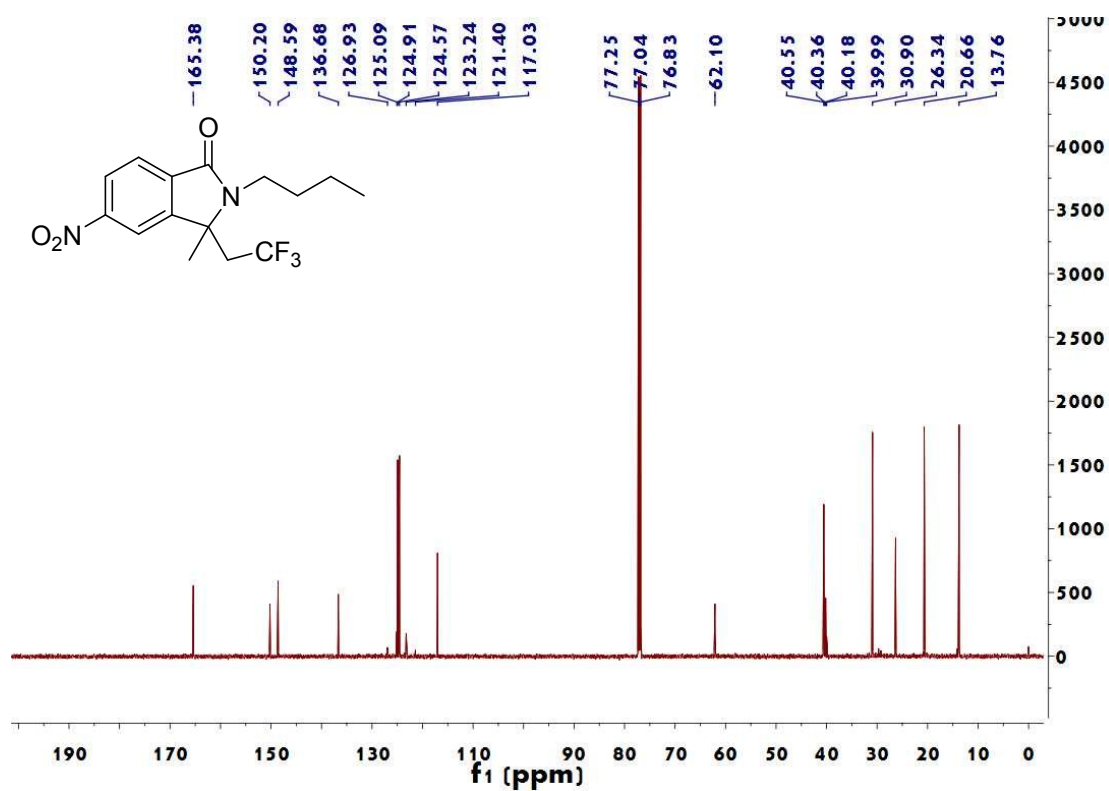

2I.  $^1\text{H}$  NMR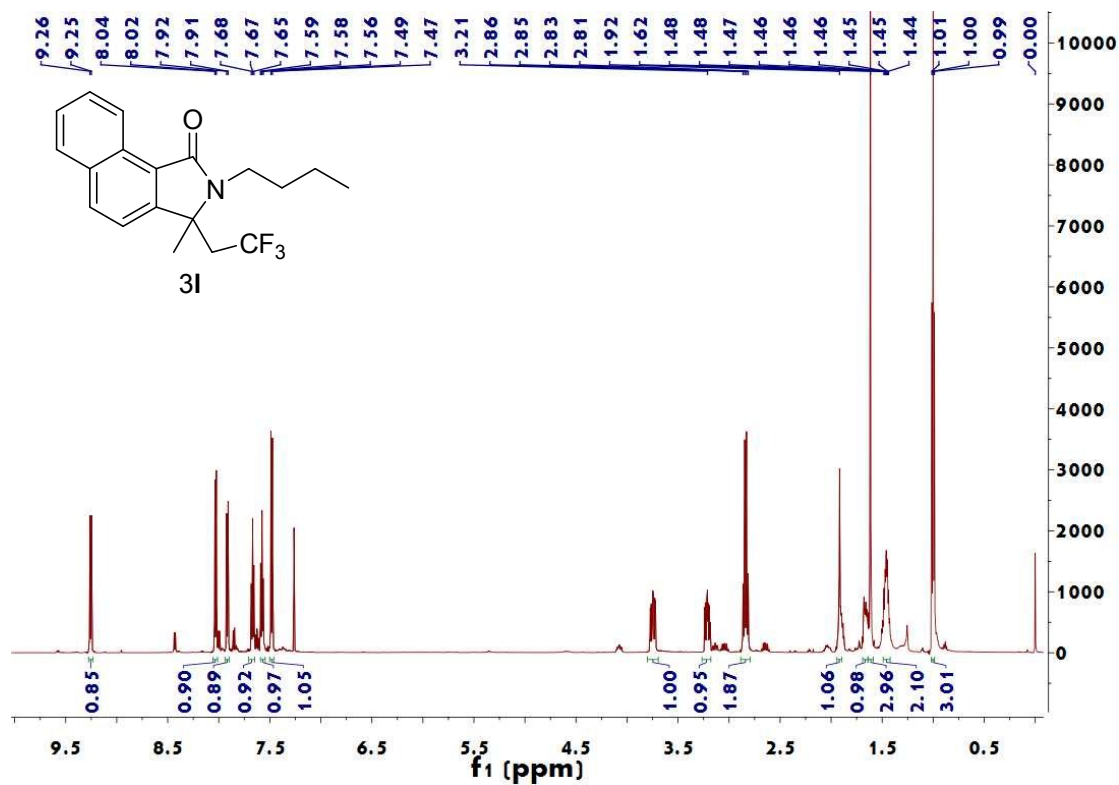2I.  $^{13}\text{C}$  NMR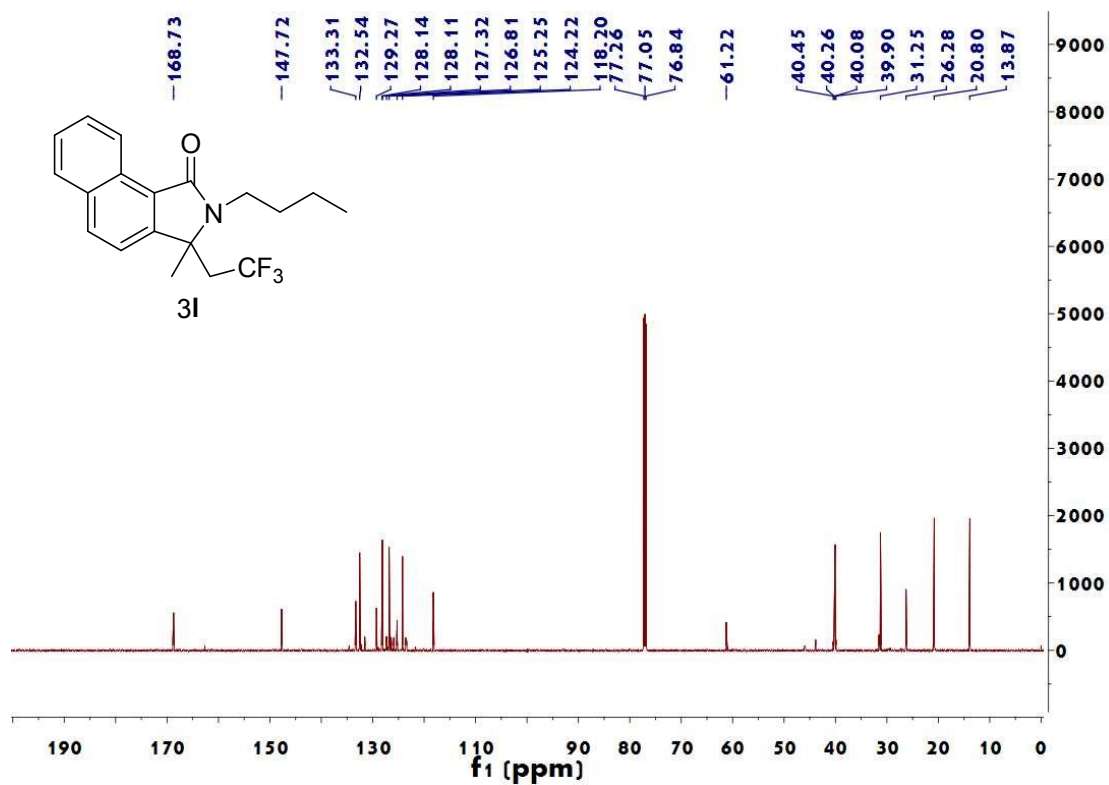

2m.  $^1\text{H}$  NMR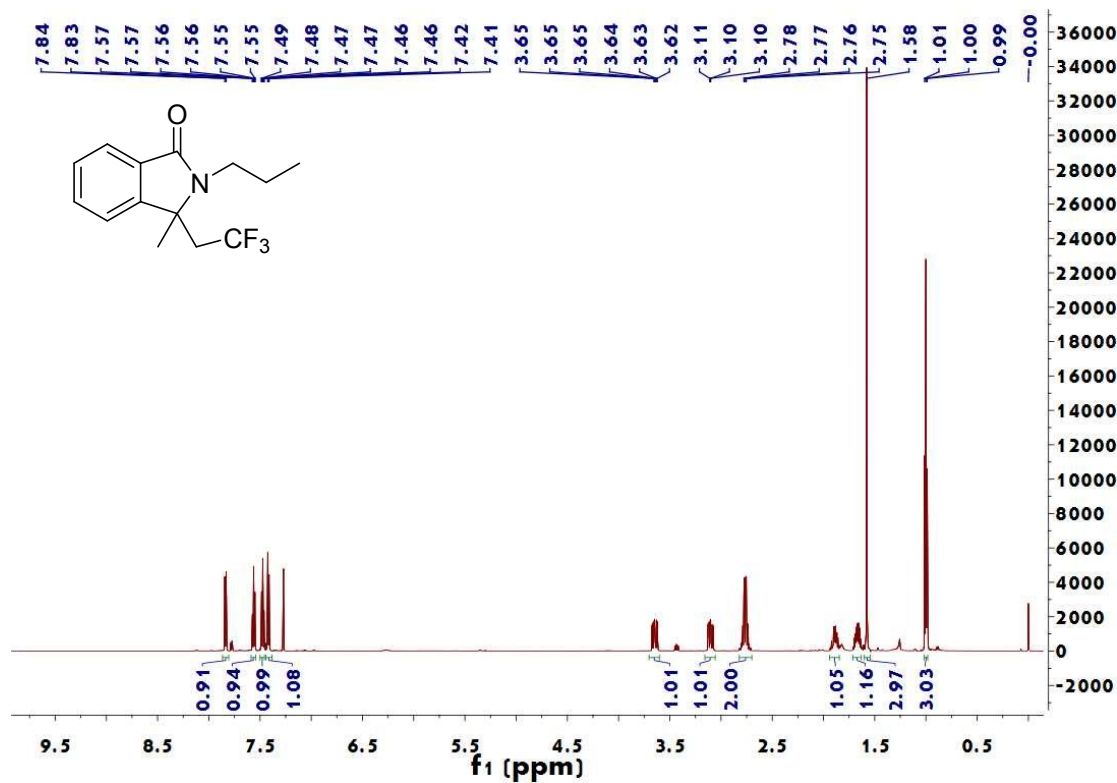2m.  $^{13}\text{C}$  NMR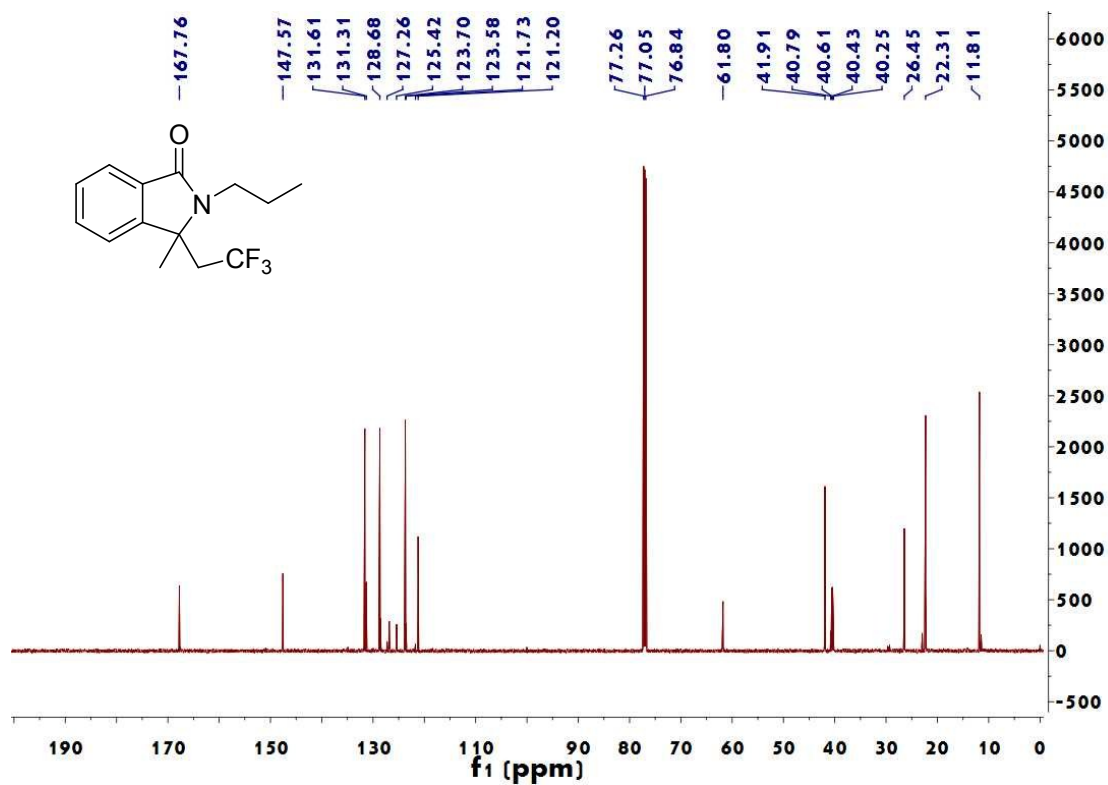

2n.  $^1\text{H}$  NMR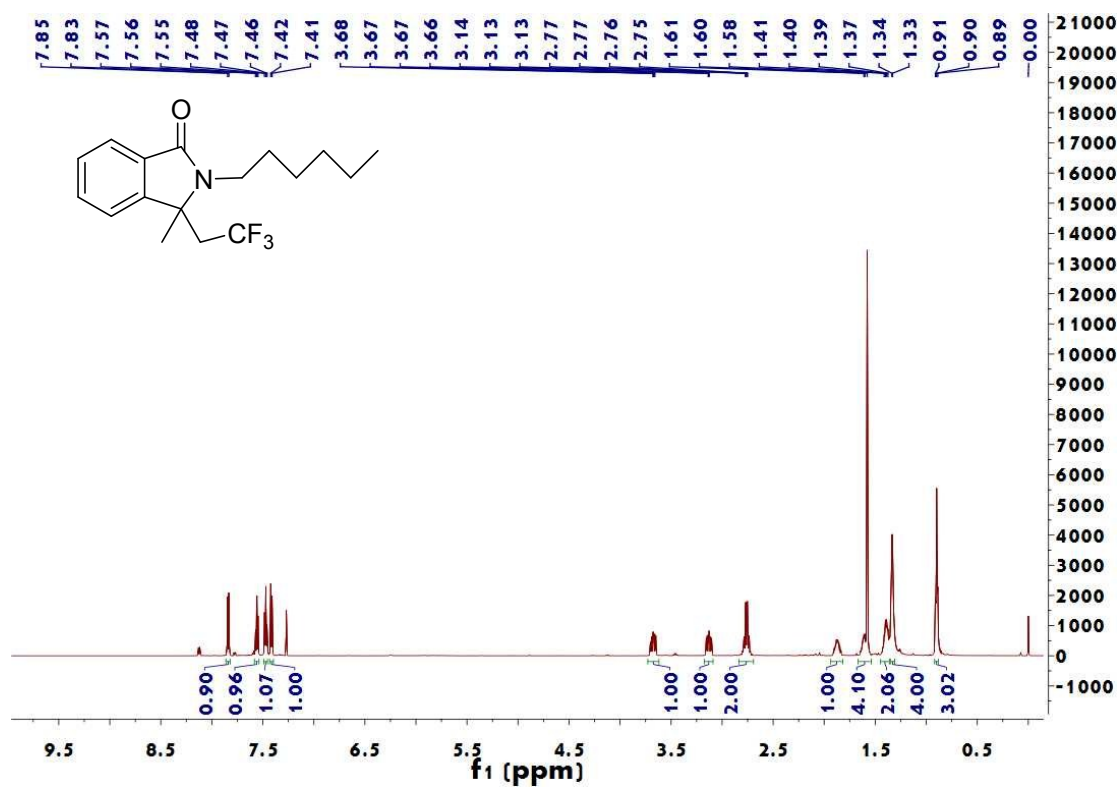2n.  $^{13}\text{C}$  NMR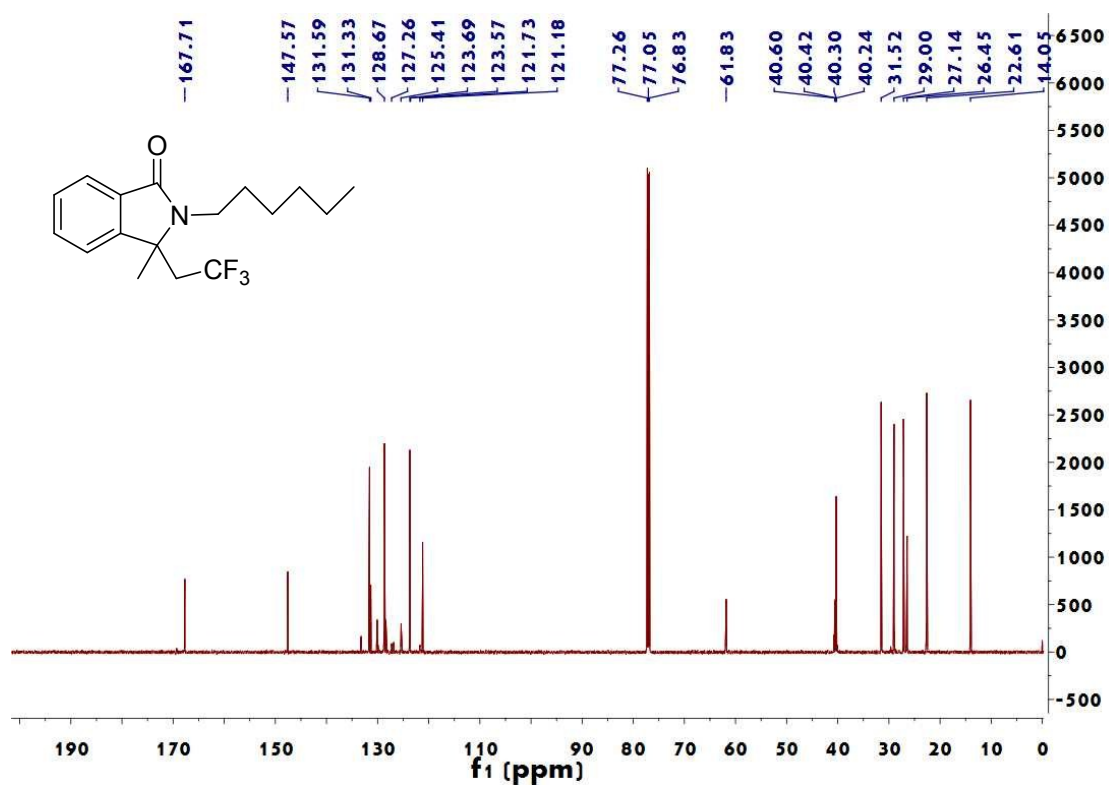

2o.  $^1\text{H}$  NMR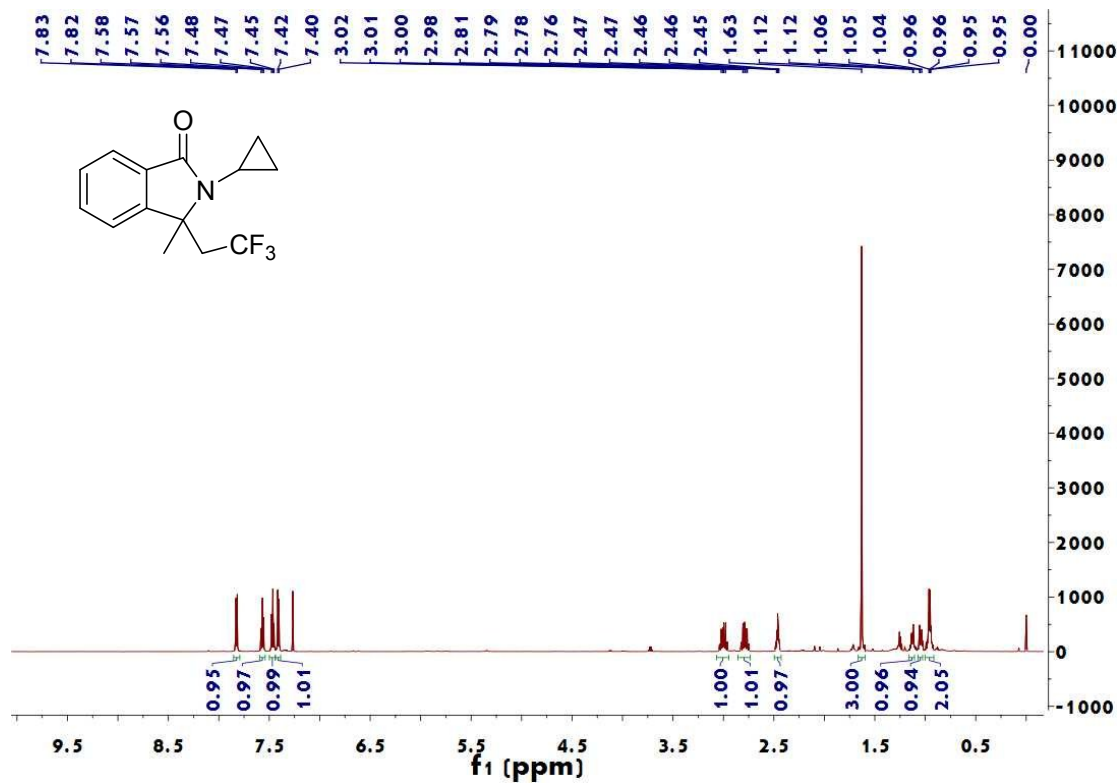2o.  $^{13}\text{C}$  NMR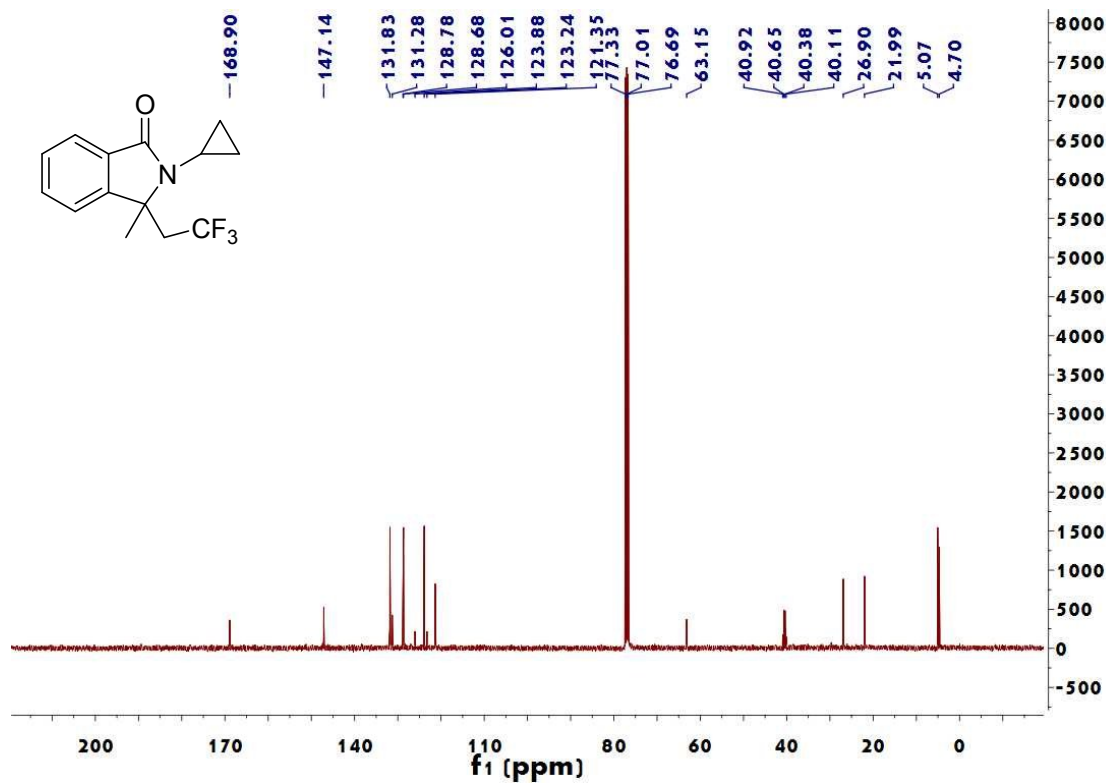

2p.  $^1\text{H}$  NMR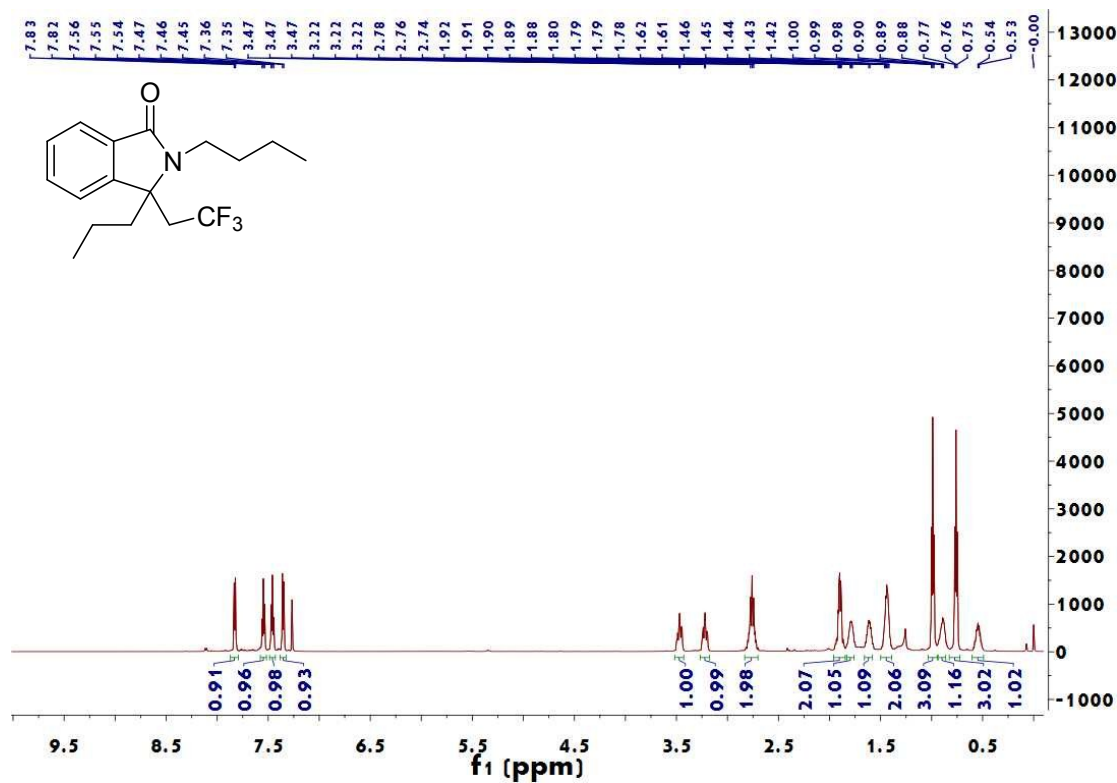2p.  $^{13}\text{C}$  NMR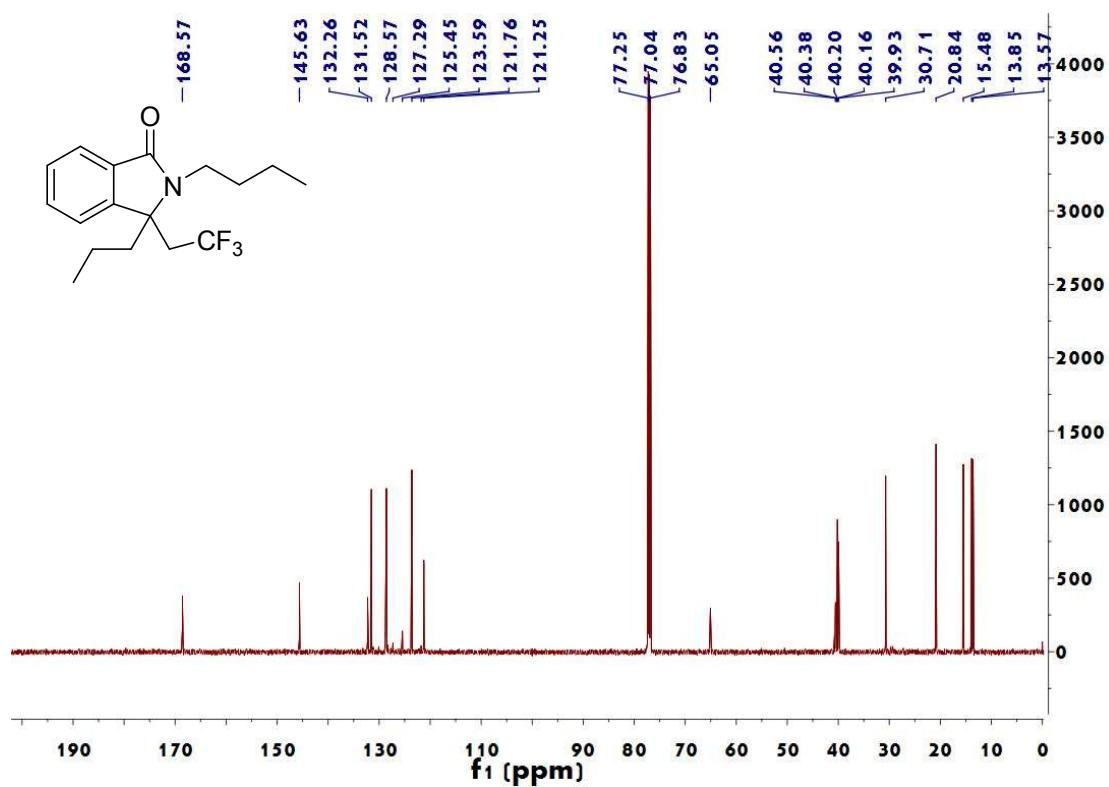



2q.  $^1\text{H}$  NMR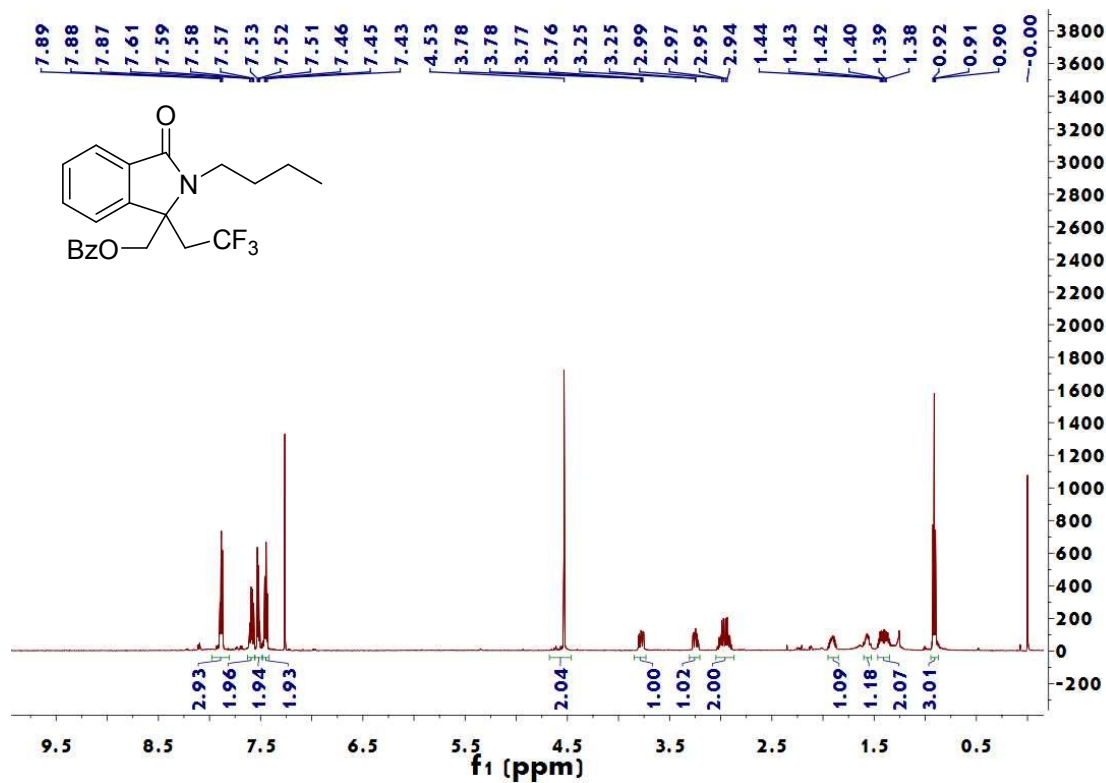2q.  $^{13}\text{C}$  NMR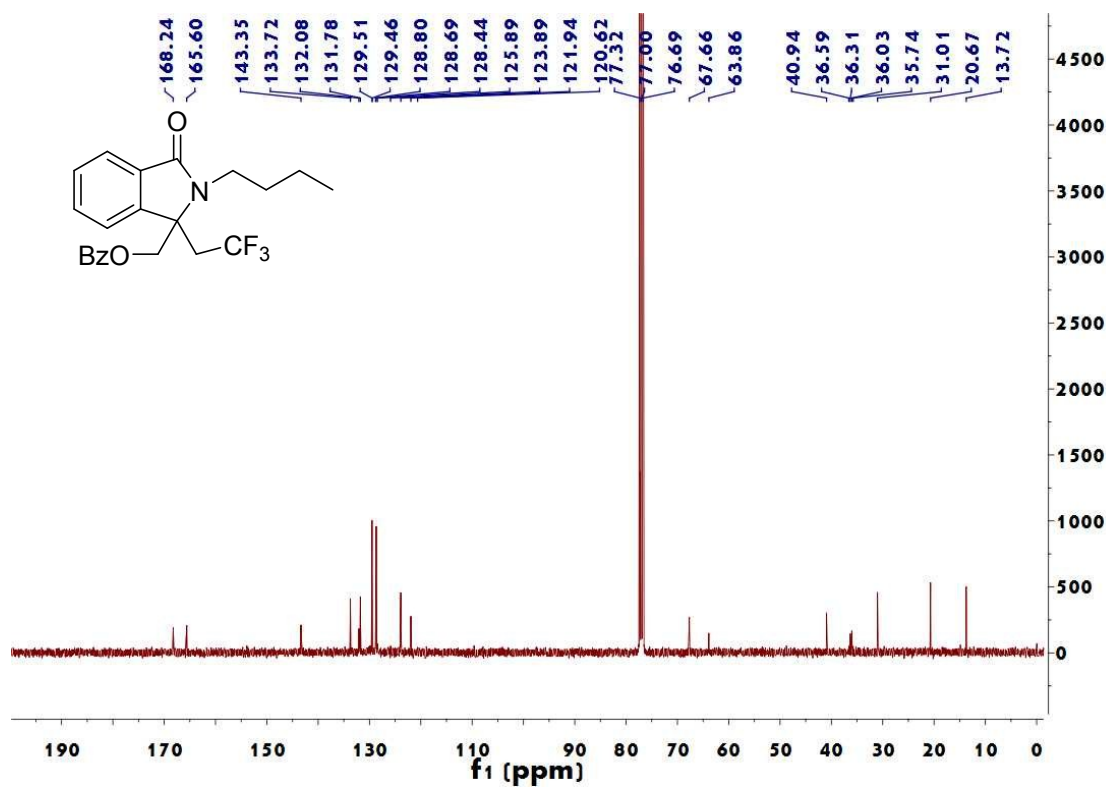

2r.  $^1\text{H}$  NMR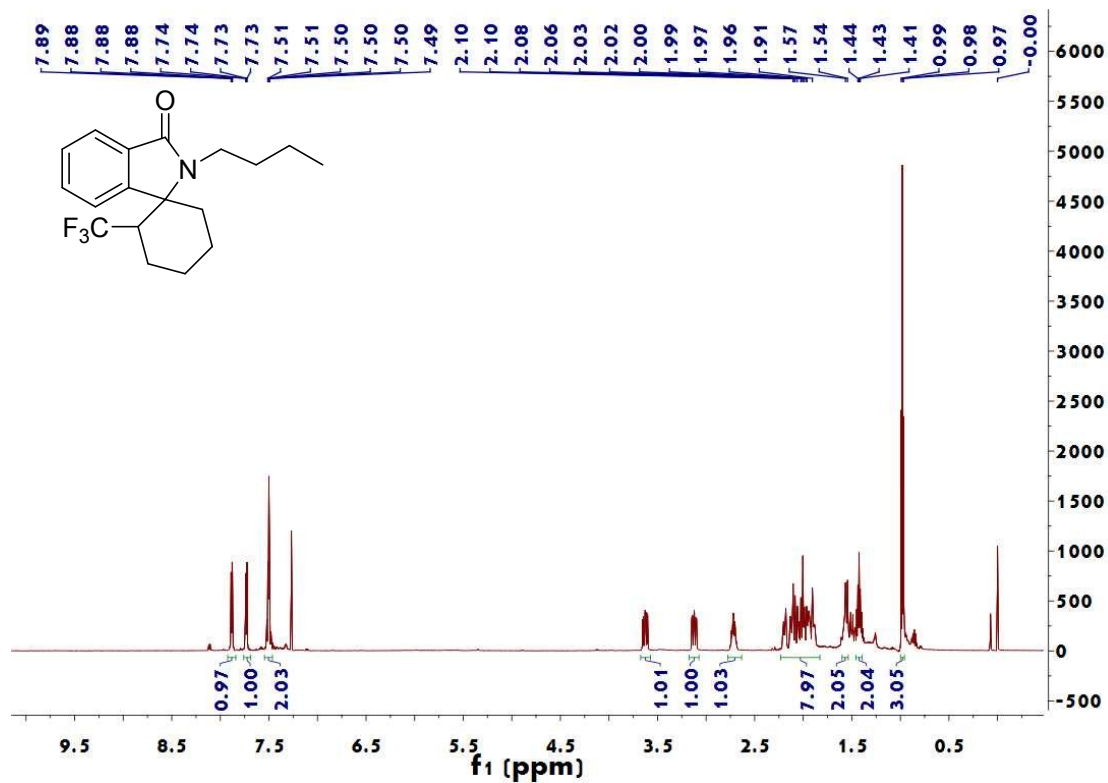2r.  $^{13}\text{C}$  NMR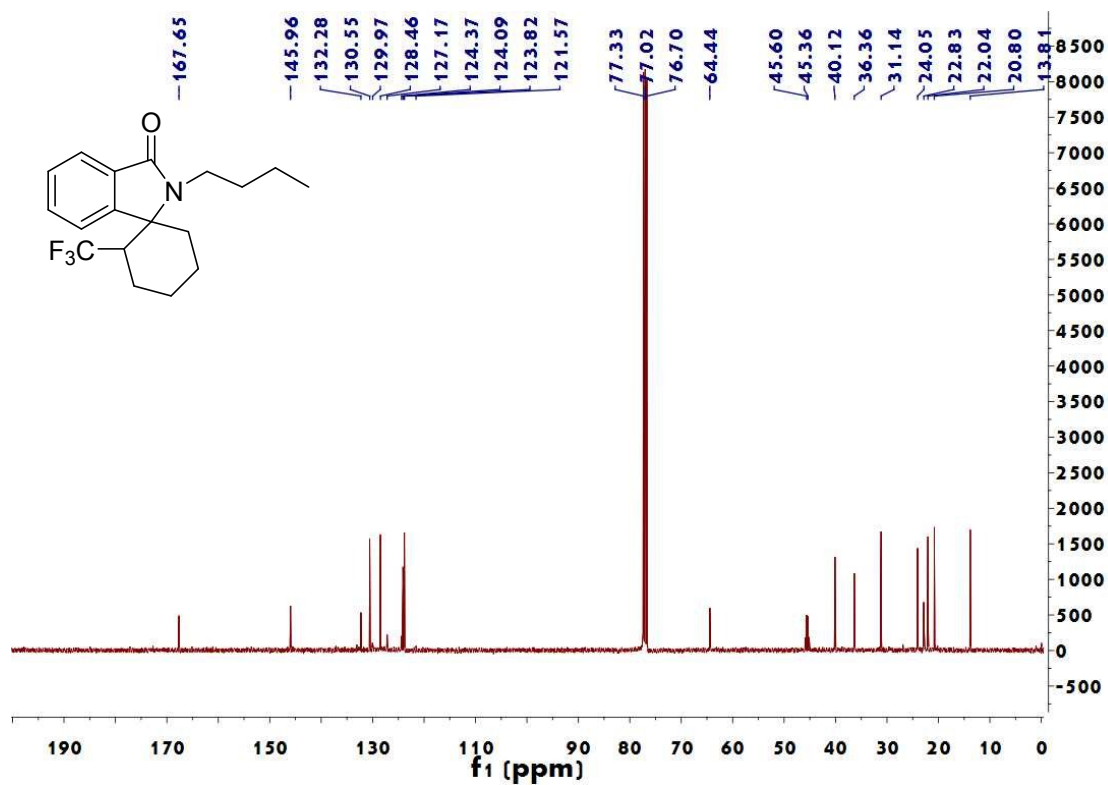

2s.  $^1\text{H}$  NMR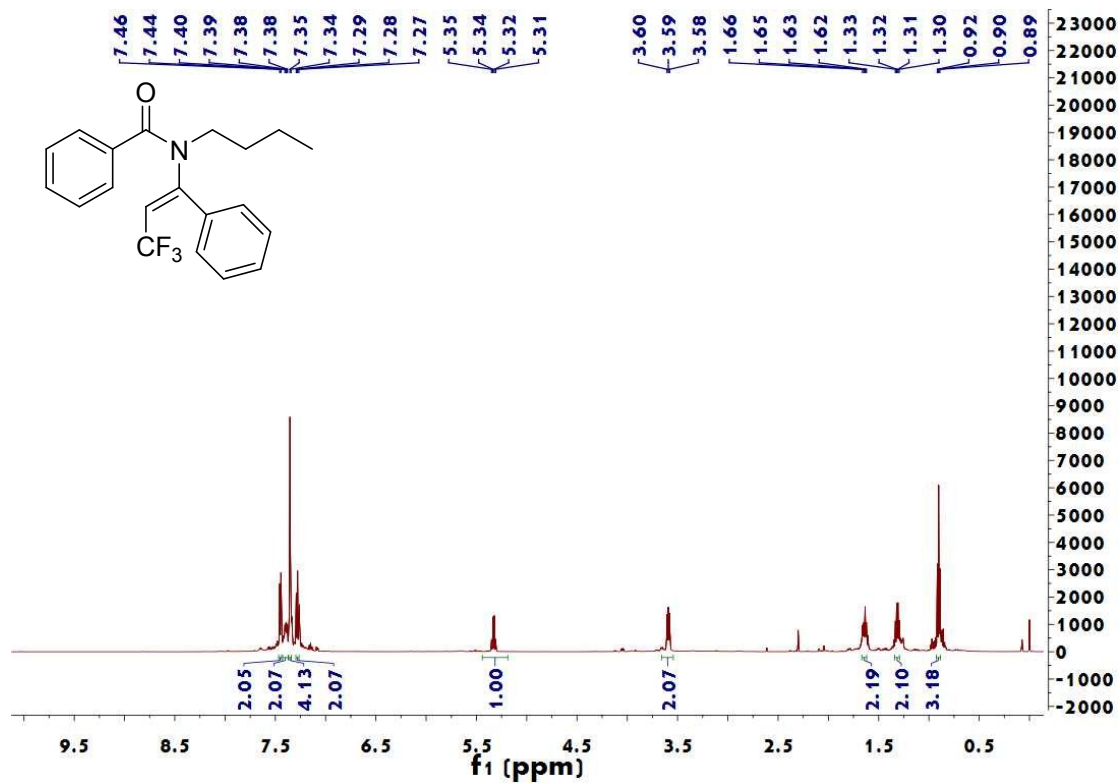2s.  $^{13}\text{C}$  NMR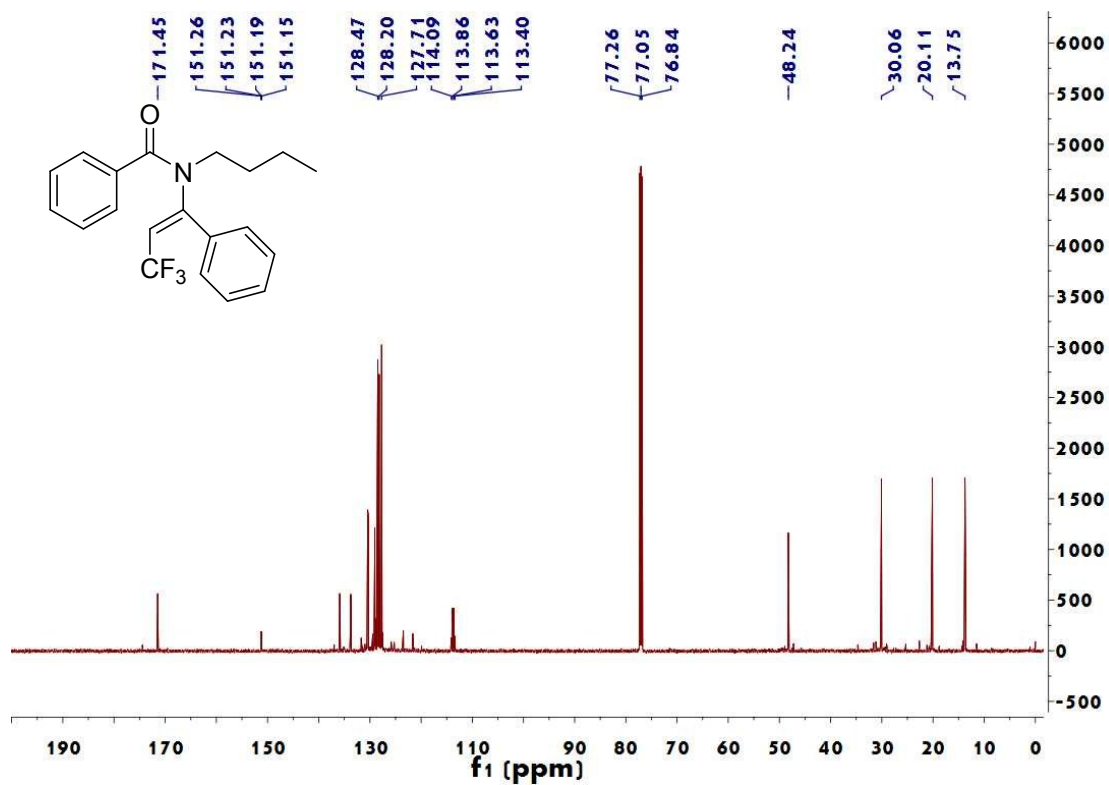

4a'.  $^1\text{H}$  NMR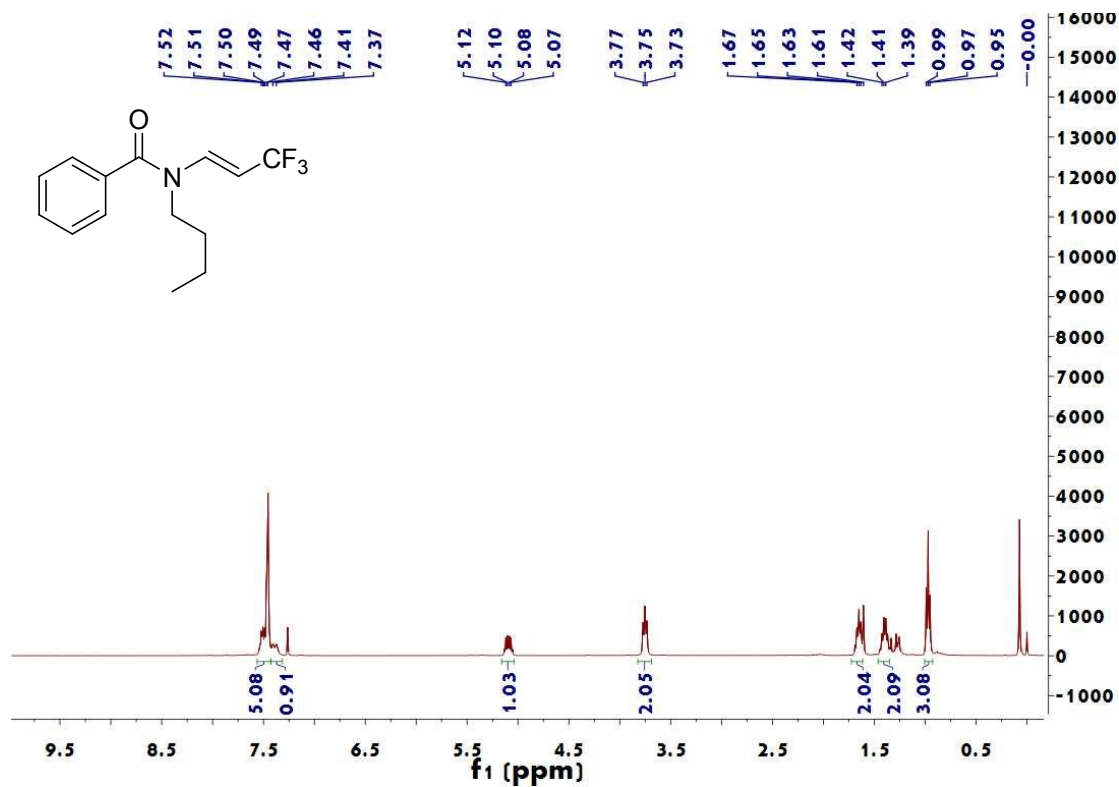4a'.  $^{13}\text{C}$  NMR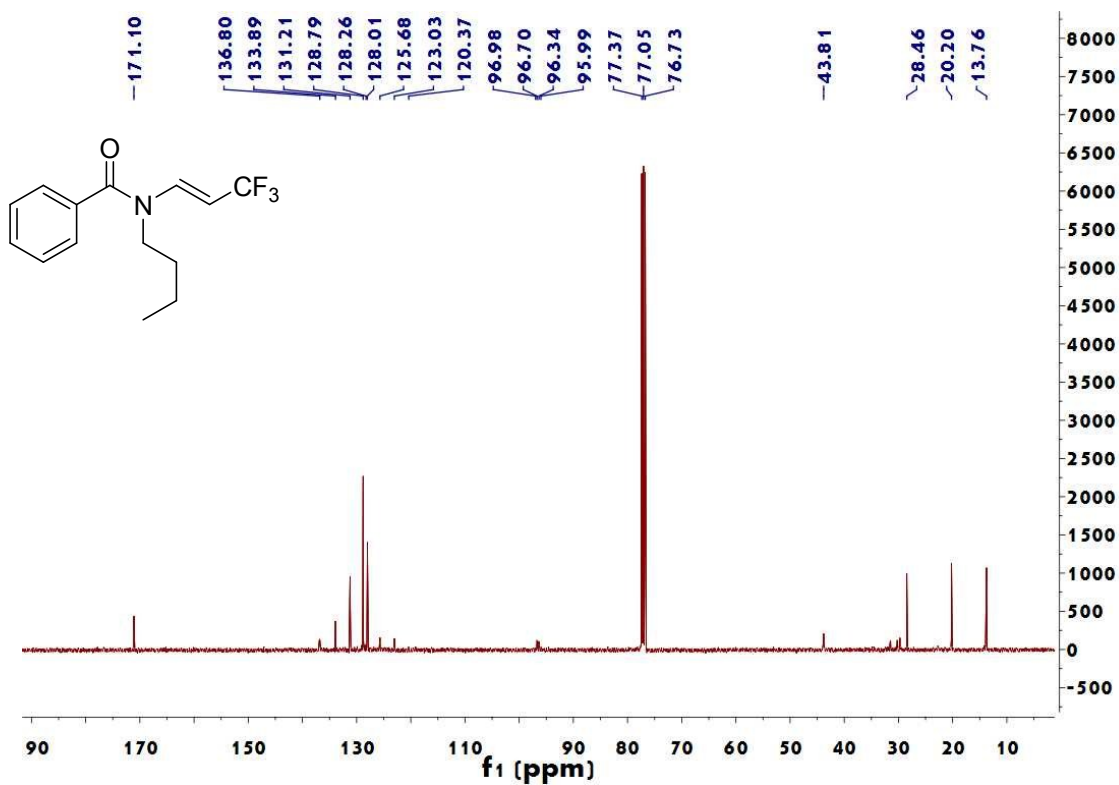

4b'. <sup>1</sup>H NMR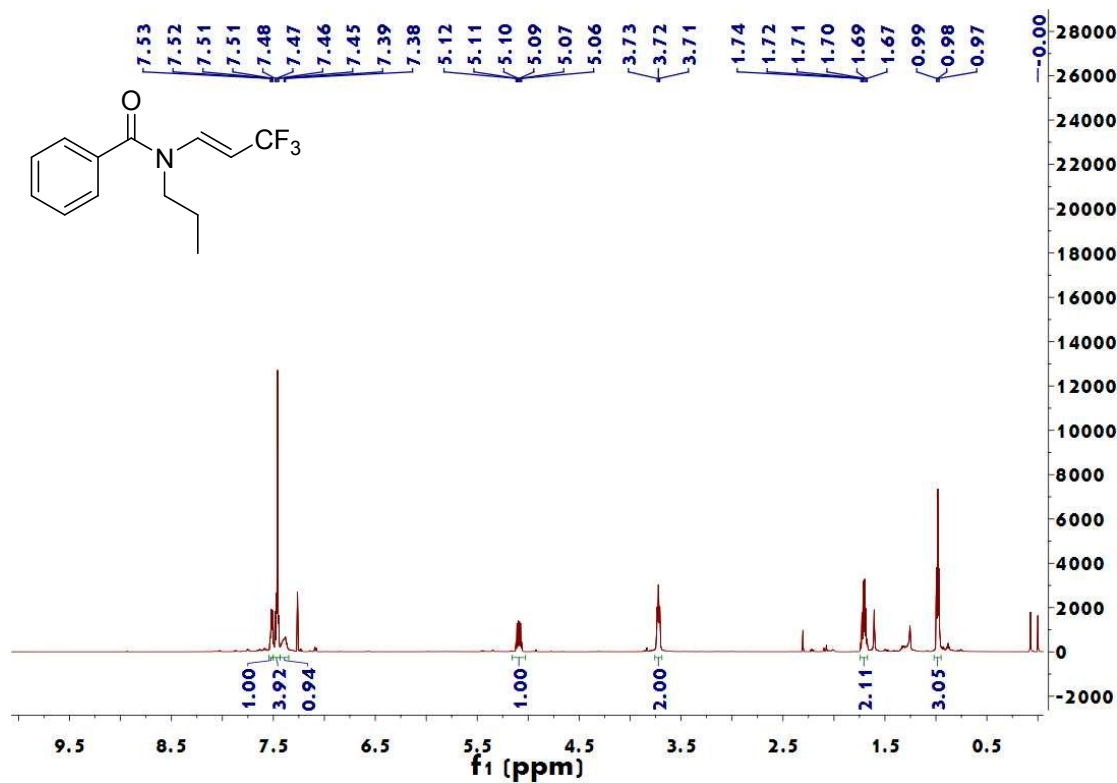4b'. <sup>13</sup>C NMR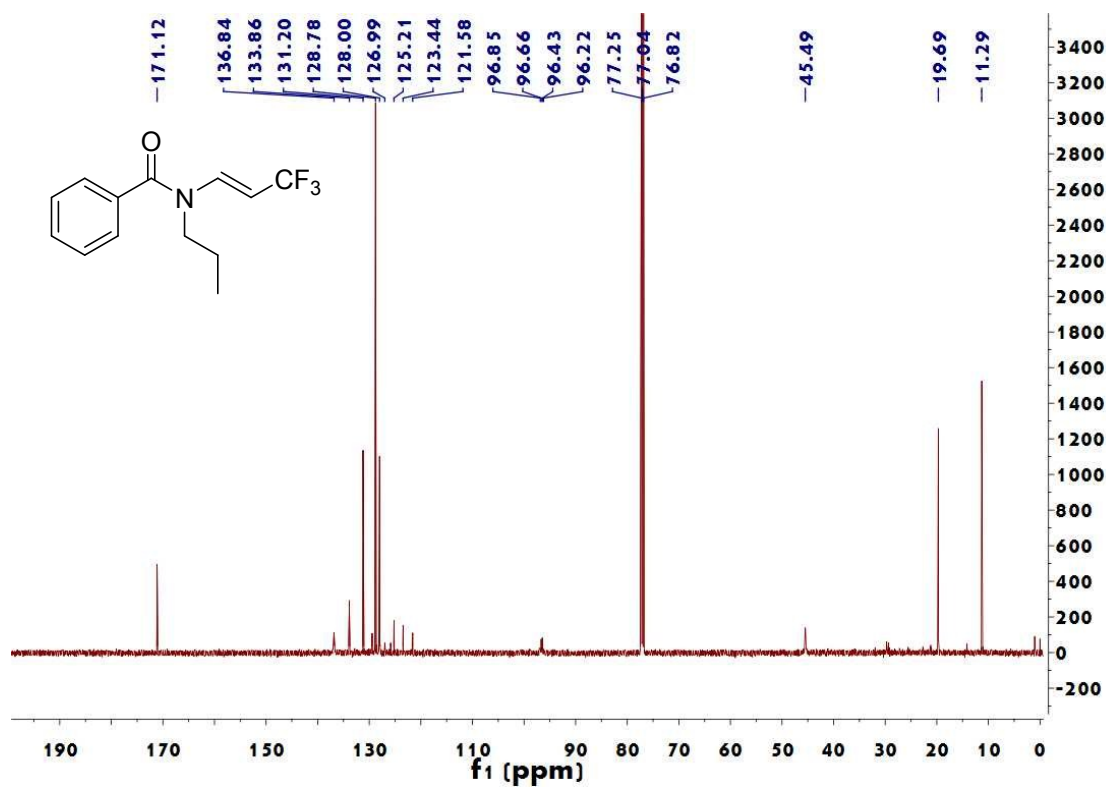

4c'.  $^1\text{H}$  NMR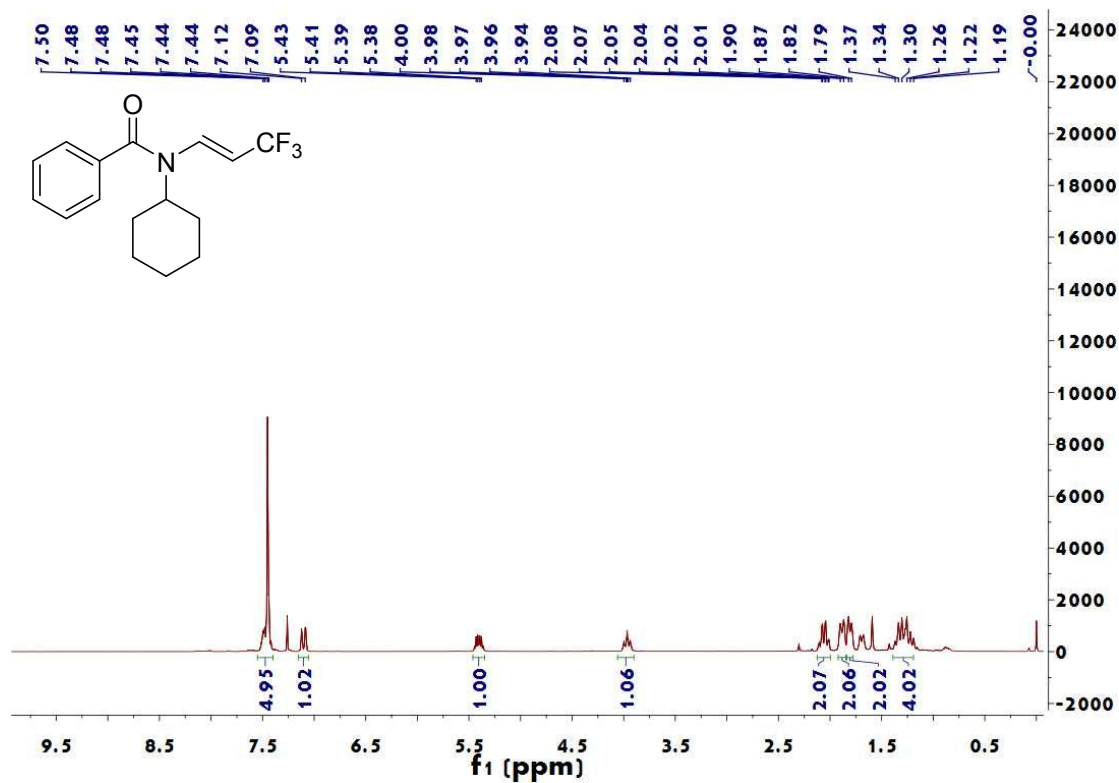4c'.  $^{13}\text{C}$  NMR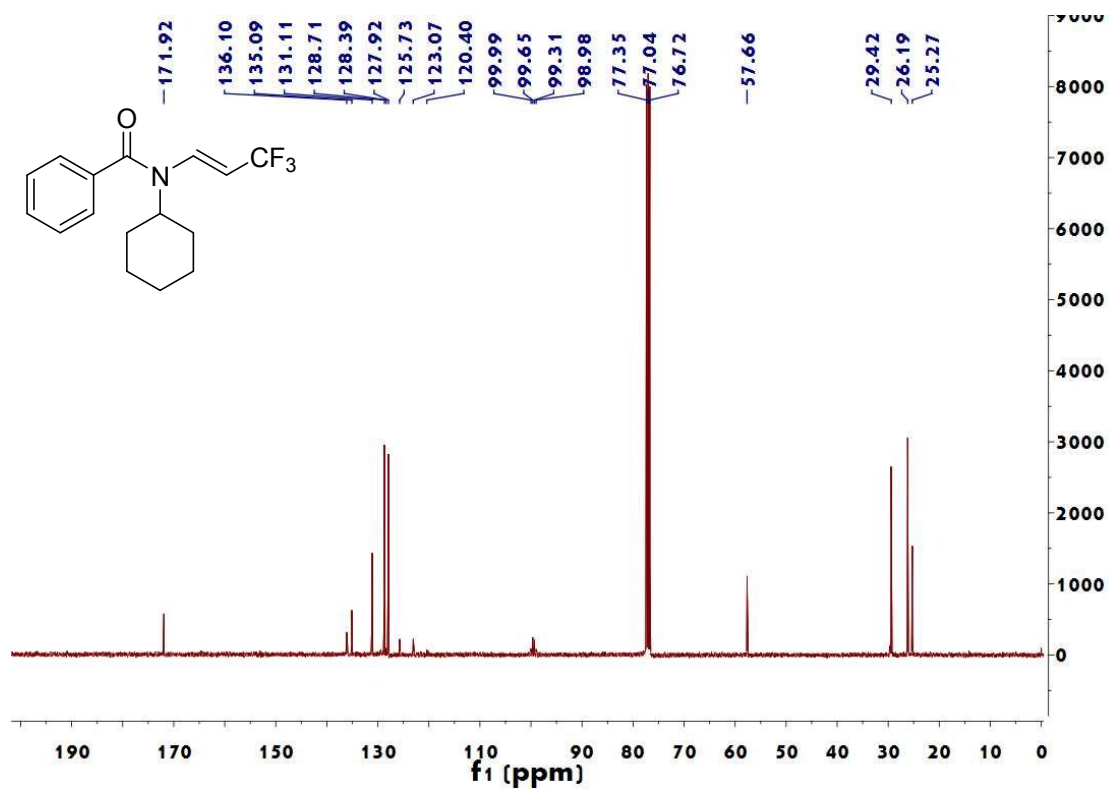

4d'.  $^1\text{H}$  NMR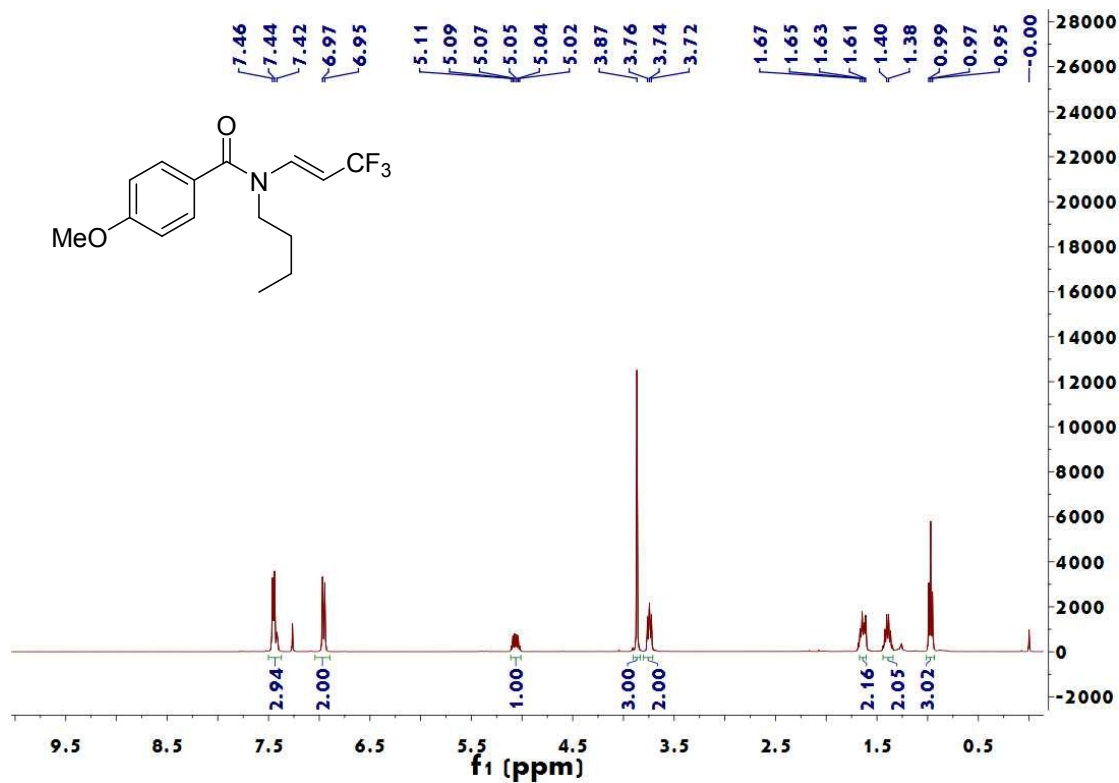4d'.  $^{13}\text{C}$  NMR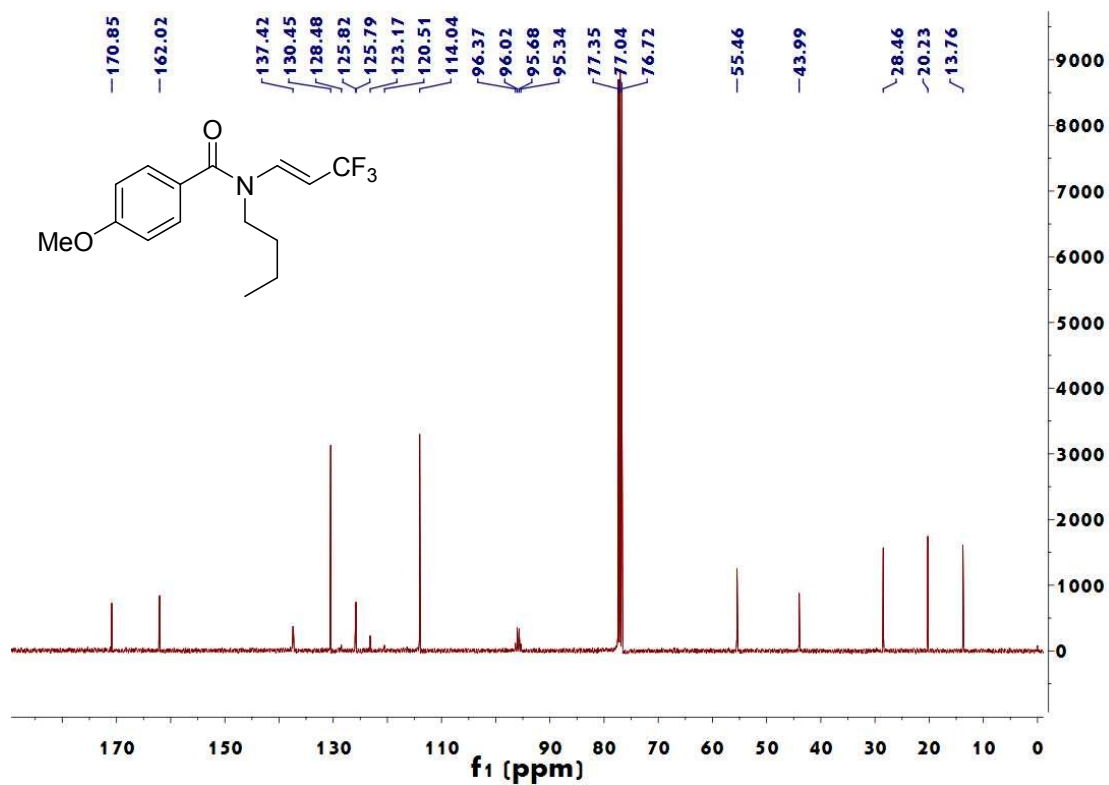

4e.  $^1\text{H}$  NMR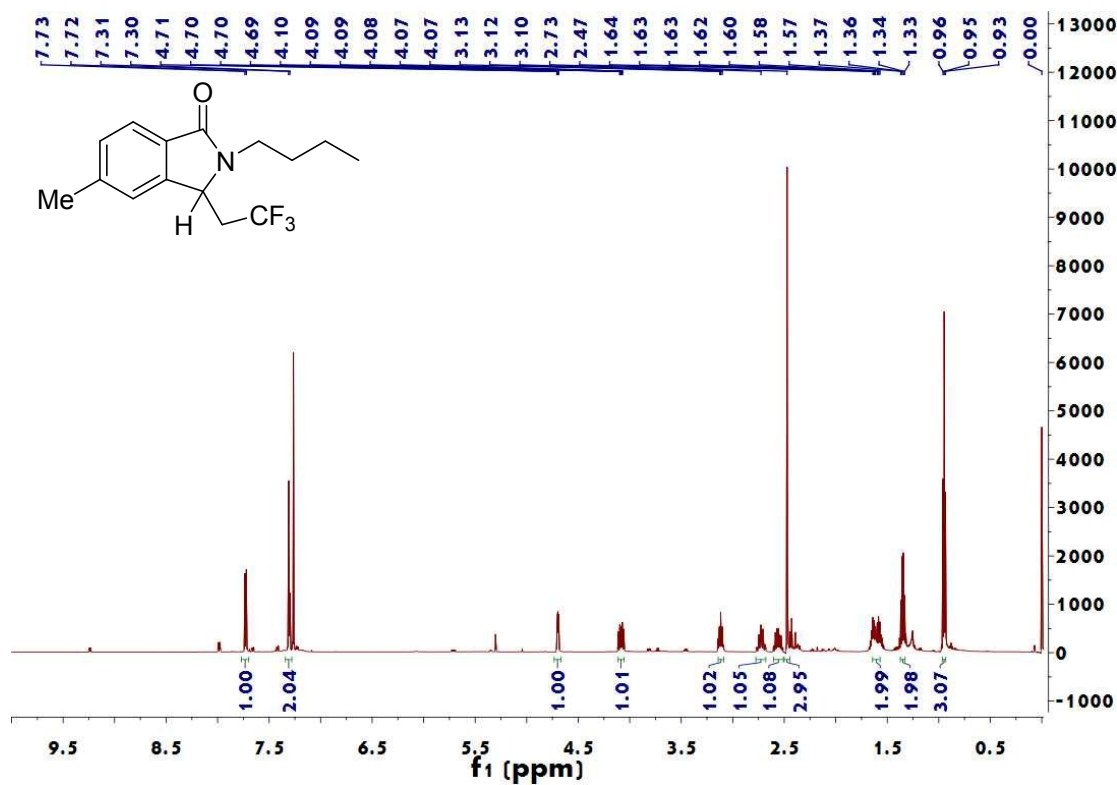4e.  $^{13}\text{C}$  NMR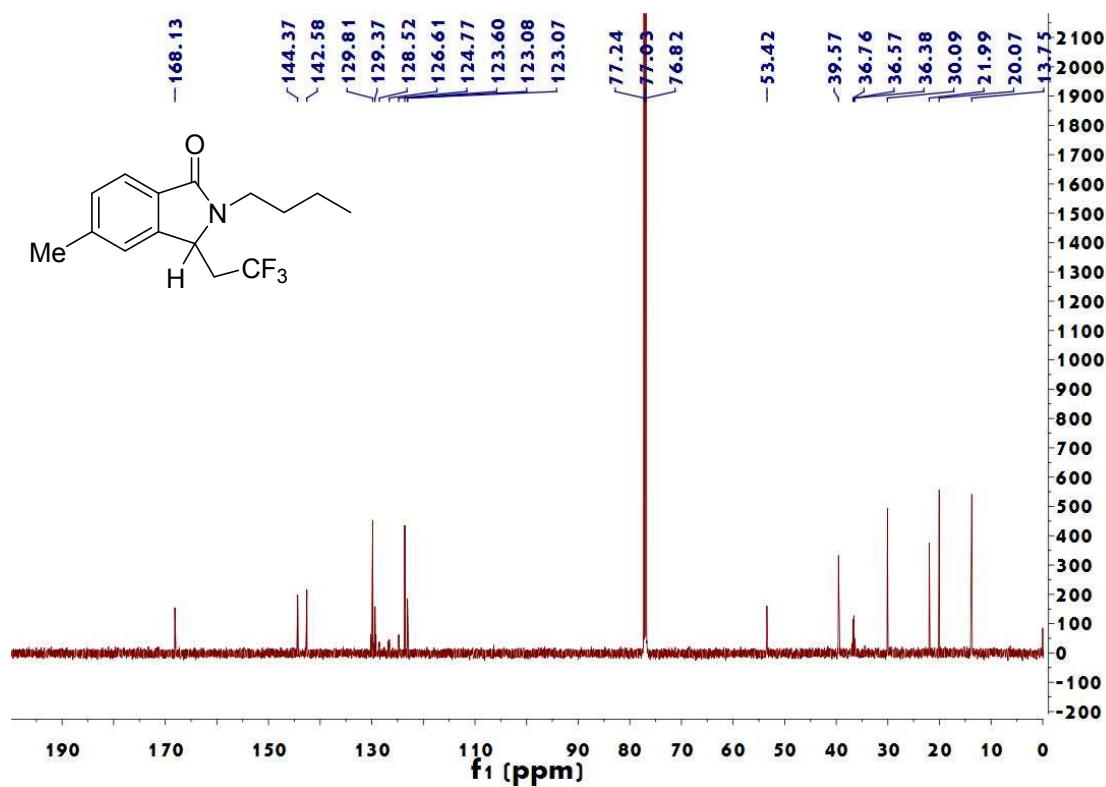



4e'.  $^1\text{H}$  NMR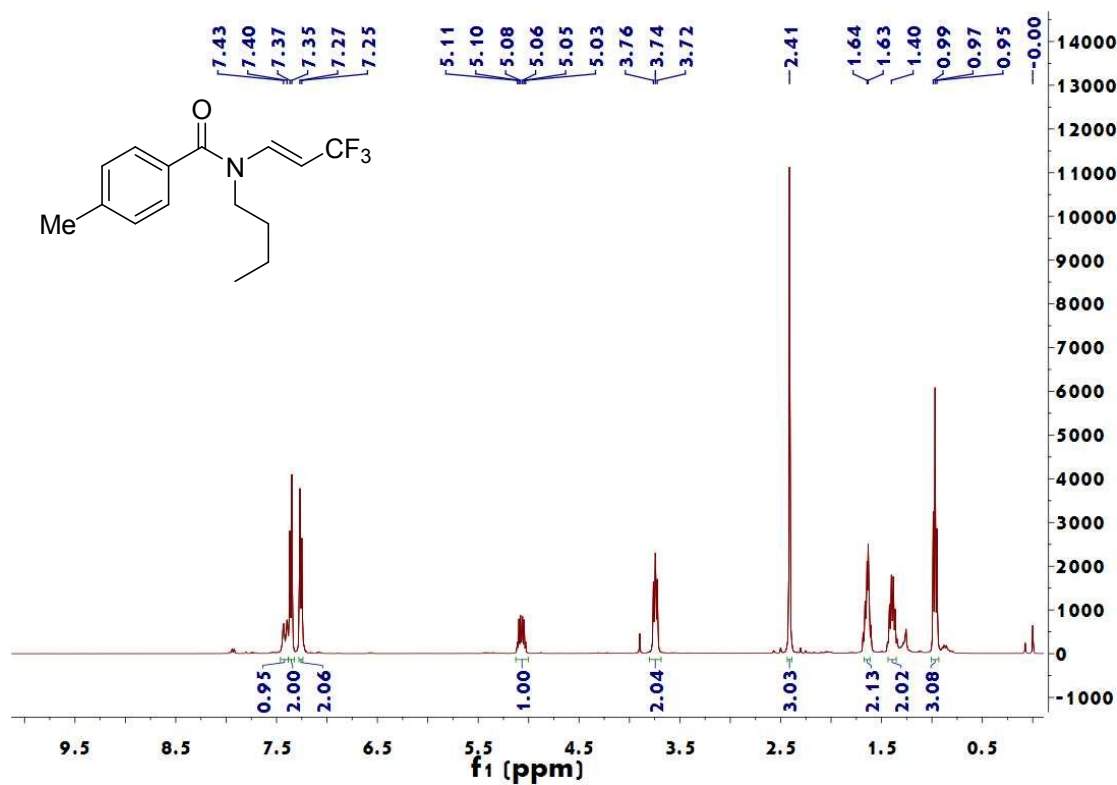4e'.  $^{13}\text{C}$  NMR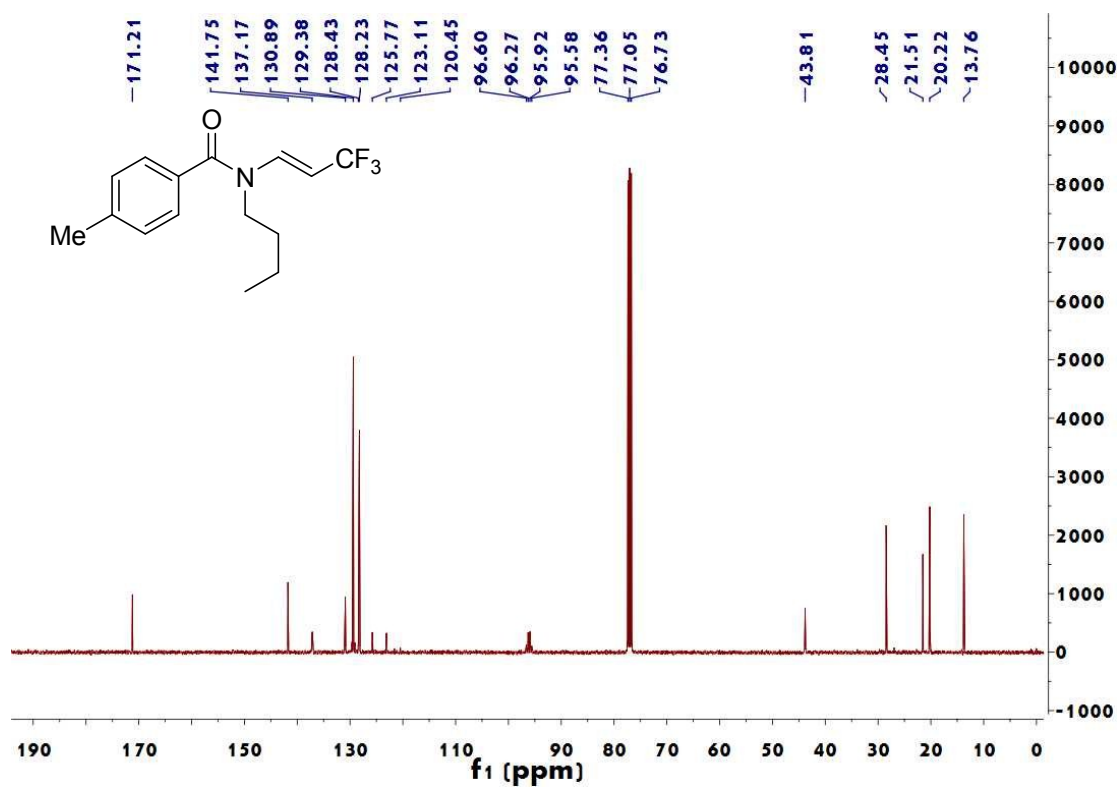

4f.  $^1\text{H}$  NMR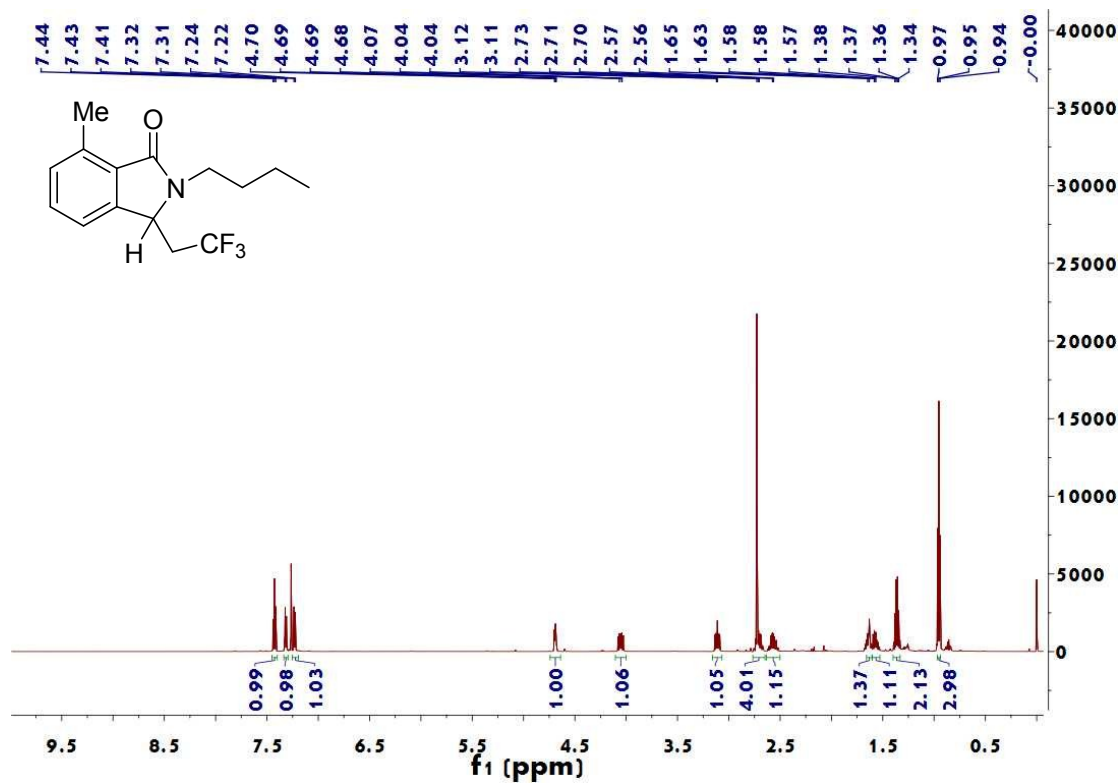4f.  $^{13}\text{C}$  NMR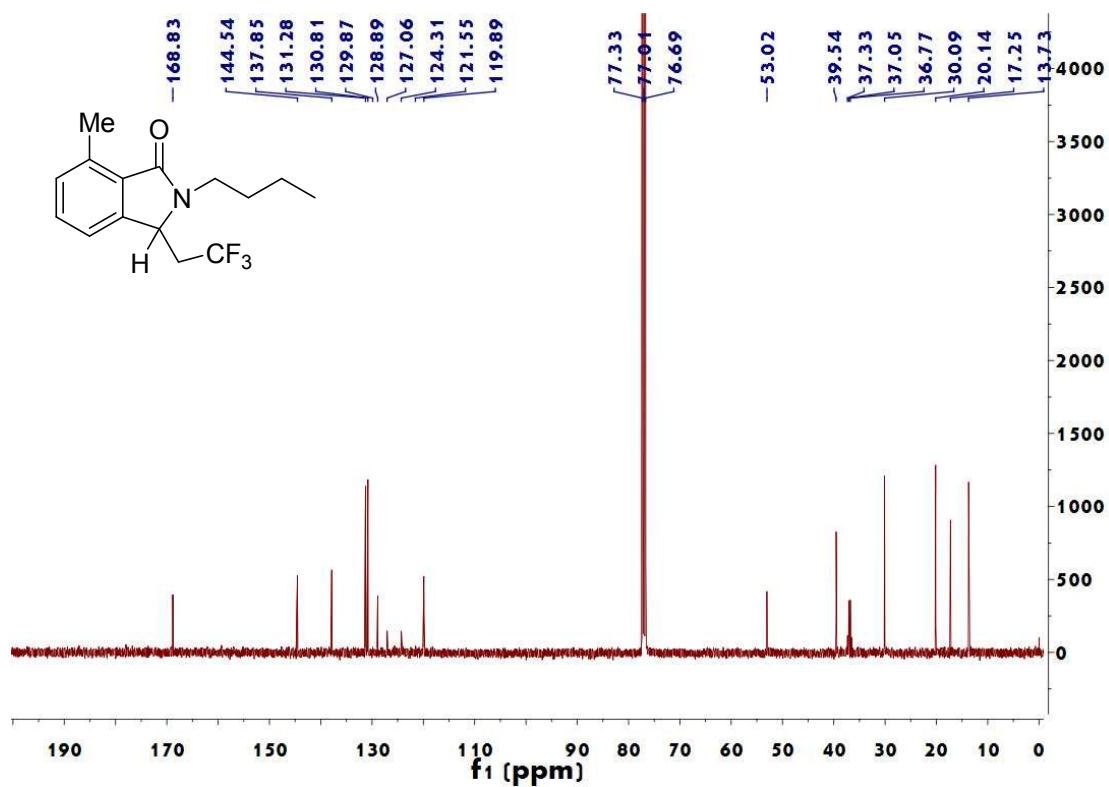

4g.  $^1\text{H}$  NMR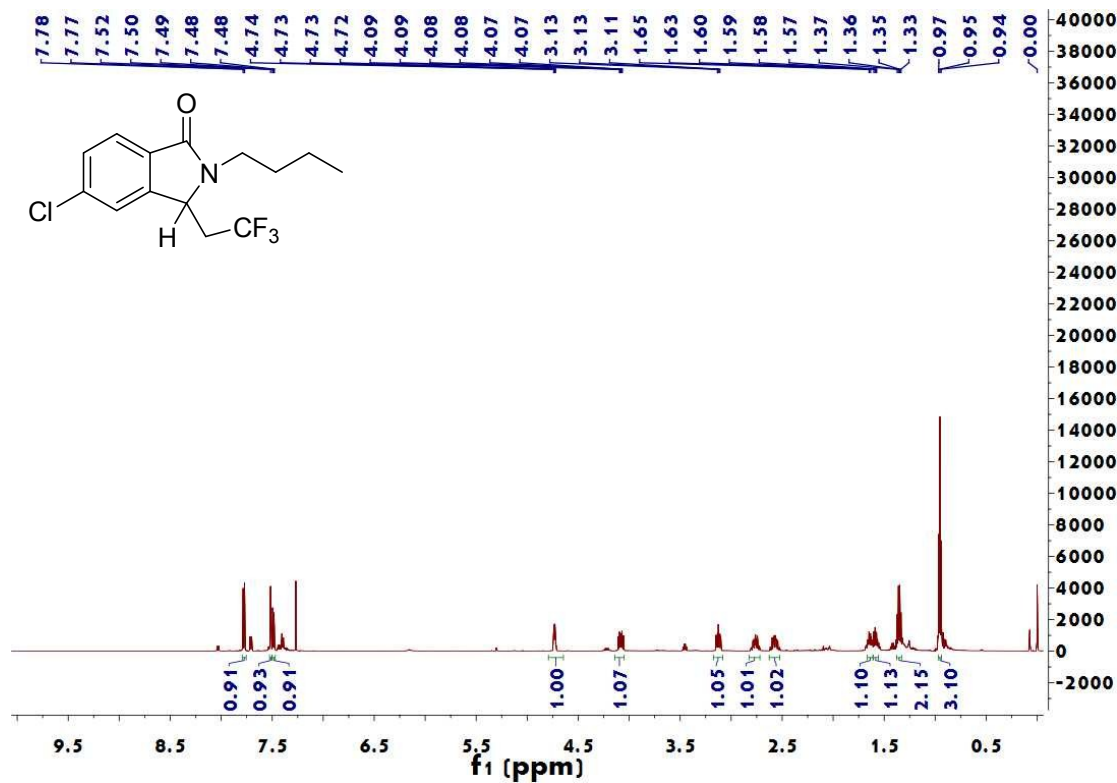4g.  $^{13}\text{C}$  NMR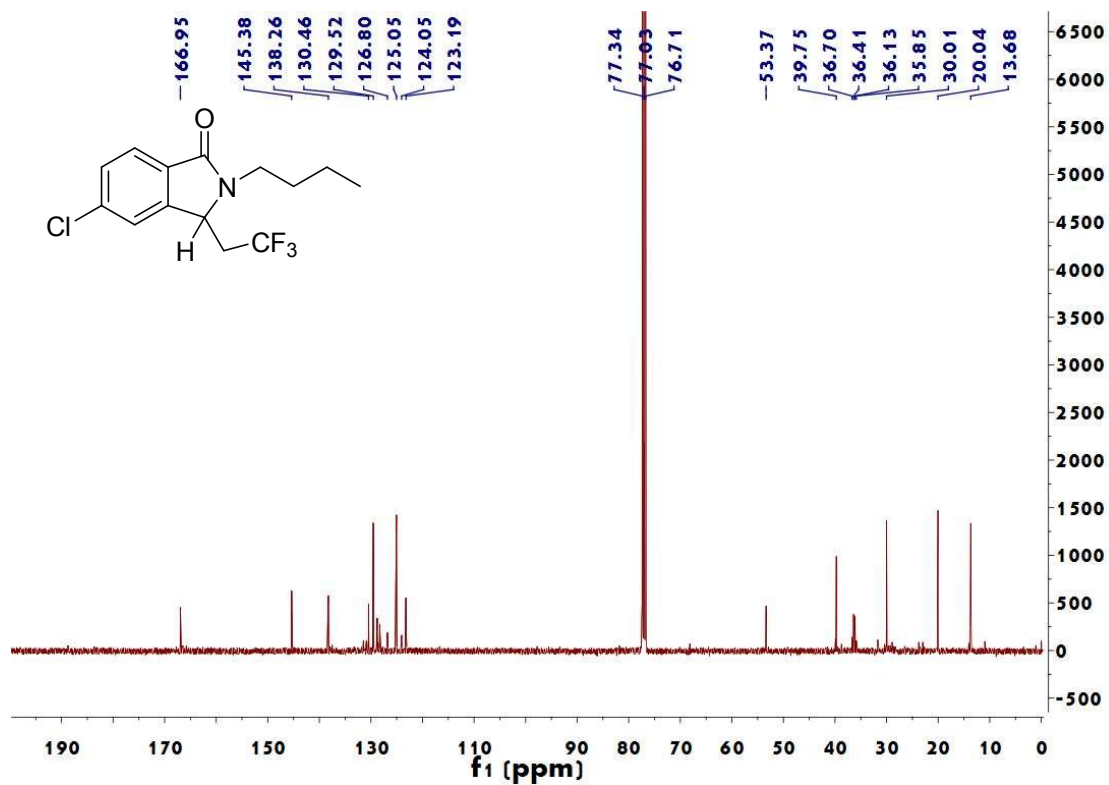

4h.  $^1\text{H}$  NMR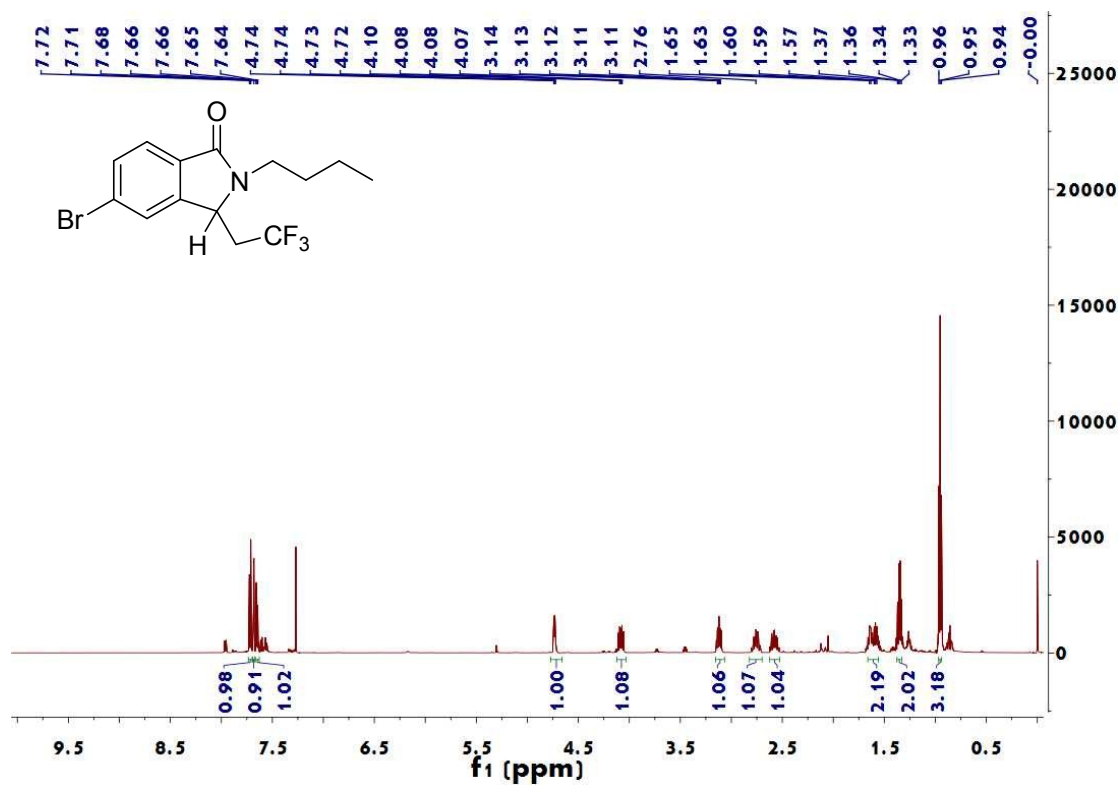4h.  $^{13}\text{C}$  NMR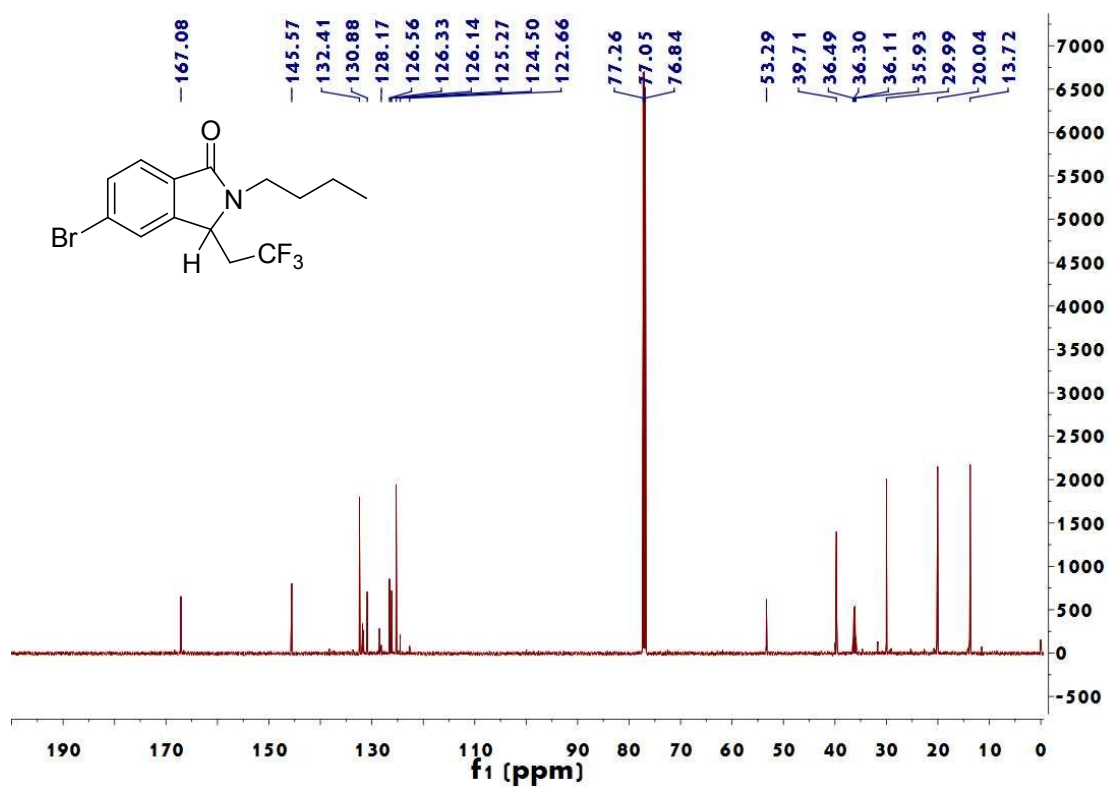

6a.  $^1\text{H}$  NMR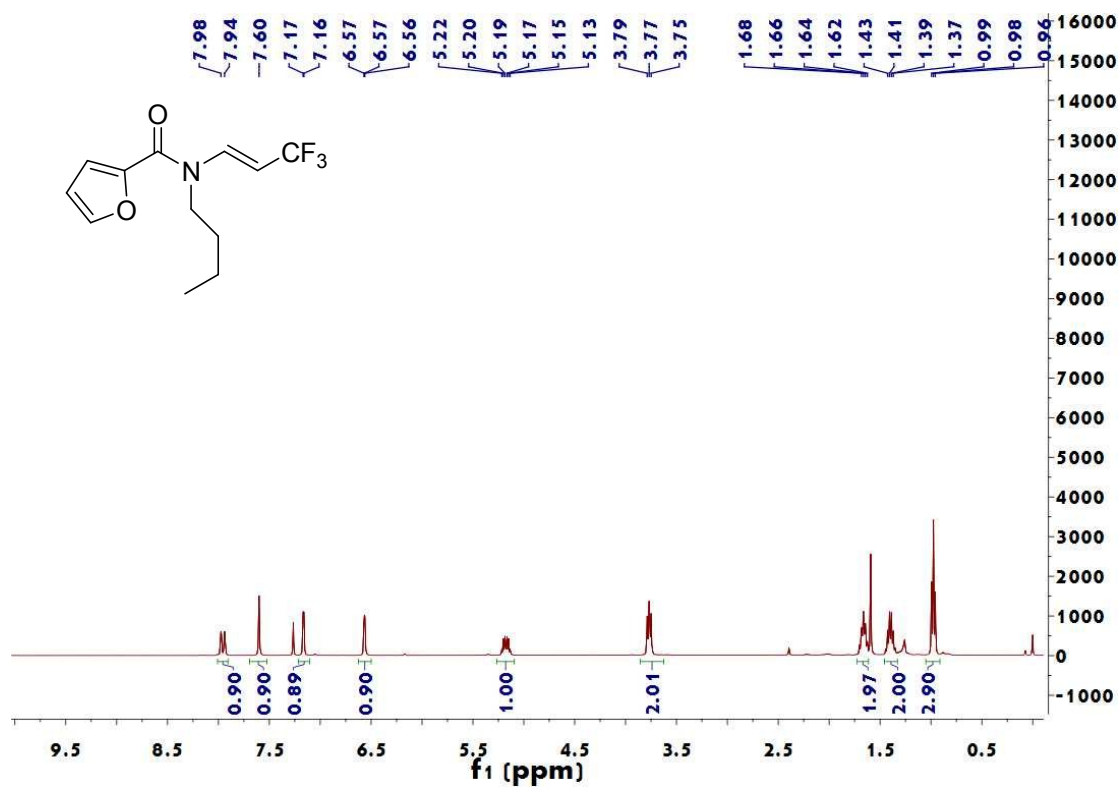6a.  $^{13}\text{C}$  NMR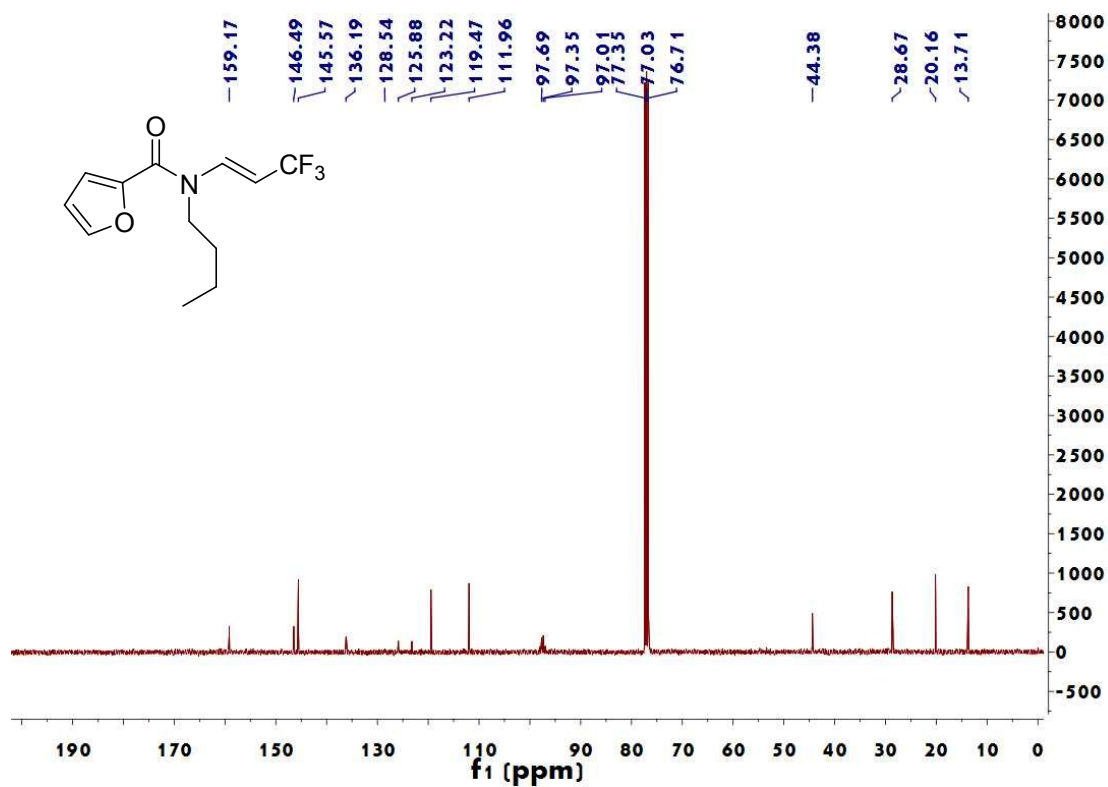

6b.  $^1\text{H}$  NMR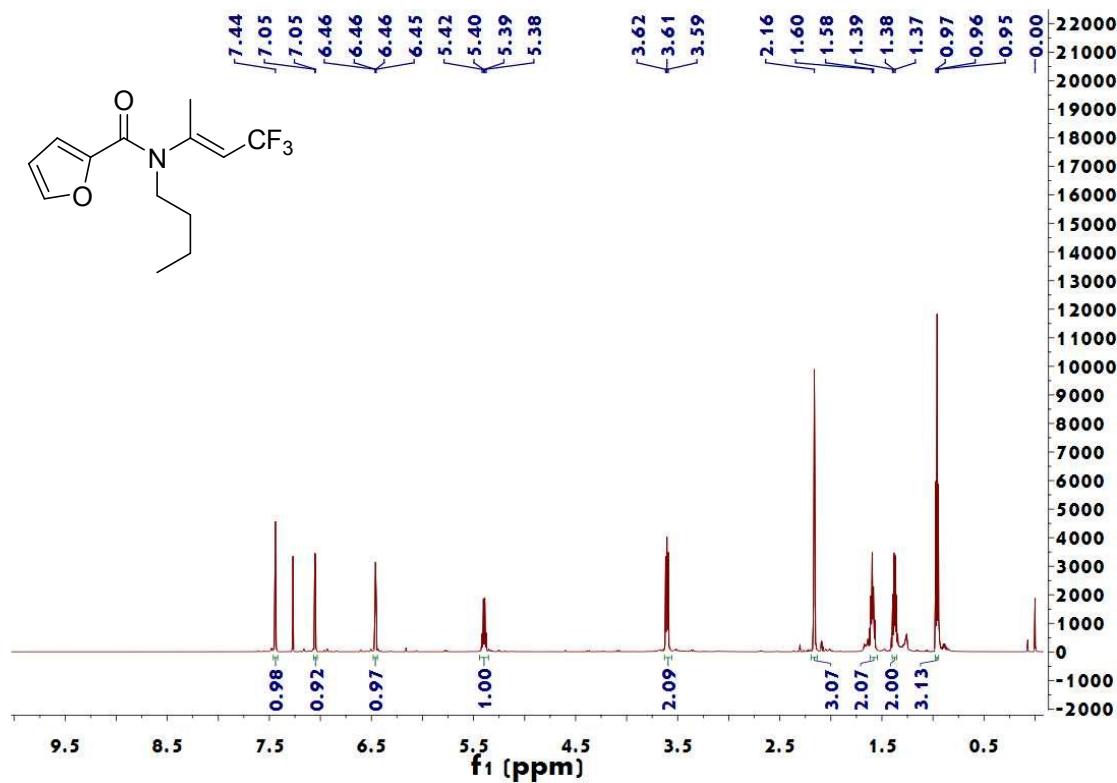6b.  $^{13}\text{C}$  NMR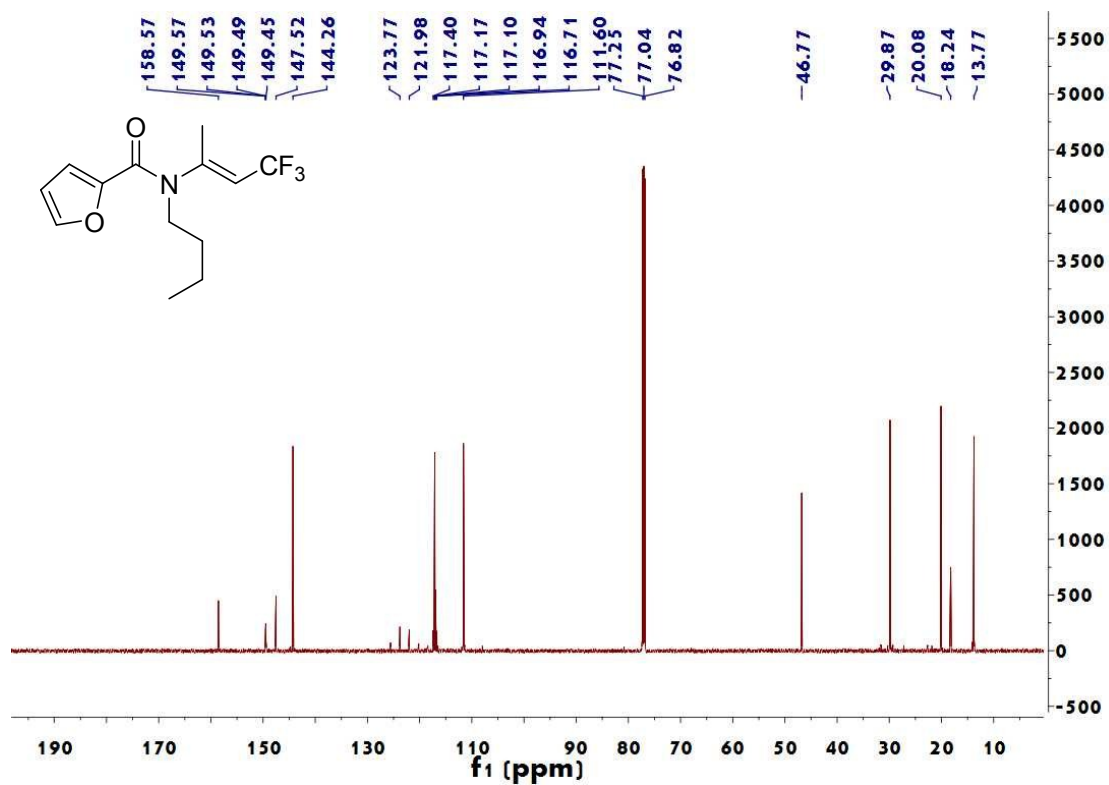

Supplement: c8ra03696a1.pdf [file c8ra03696a1.pdf]
